# Supplementary material
Source: PubMed Central journal article supplement (PMC6233652)
Supplement: jamacardiol-3-849-s001.pdf [file jamacardiol-3-849-s001.pdf]

## Supplementary Online Content

Cai T, Zhang Y, Ho Y-L, et al. Association of interleukin 6 receptor variant with cardiovascular disease effects of interleukin 6 receptor blocking therapy: a phenome-wide association study. *JAMA Cardiol*. Published online August 8, 2018. doi:10.1001/jamacardio.2018.2287

**eTable 1.** Association between *IL6R* and PheWAS codes in the Million Veteran Program

**eTable 2.** Positive predictive value of PheWAS codes based on medical record review

**eTable 3.** Replication of significant associations in the Million Veteran Program (false discovery rate < 0.05) in the UK Biobank and BioVU

**eFigure.** PheWAS plot for *IL6R* showing phenotypes (defined as  $\geq 1$  PheWAS code) with significant associations in the Million Veteran Program

This supplementary material has been provided by the authors to give readers additional information about their work.

**eTable 1.** Association between *IL6R* and PheWAS codes in the Million Veteran Program

| PheWAS code | Phenotype description                                                                | Prevalence (%) | p-value  | Odds Ratio (95% CI) |
|-------------|--------------------------------------------------------------------------------------|----------------|----------|---------------------|
| 442.11      | Abdominal aortic aneurysm                                                            | 2.39           | 3.73E-15 | 0.87 (0.84, 0.9)    |
| 411.4       | Coronary atherosclerosis                                                             | 20.5           | 3.43E-12 | 0.95 (0.94, 0.97)   |
| 411         | Ischemic Heart Disease                                                               | 25.36          | 3.97E-12 | 0.95 (0.94, 0.97)   |
| 411.8       | Other chronic ischemic heart disease, unspecified                                    | 14.89          | 6.04E-12 | 0.95 (0.93, 0.96)   |
| 442.1       | Aortic aneurysm                                                                      | 3.01           | 1.02E-11 | 0.9 (0.87, 0.93)    |
| 442         | Other aneurysm                                                                       | 3.44           | 2.57E-09 | 0.92 (0.89, 0.94)   |
| 411.2       | Myocardial infarction                                                                | 5.52           | 1.69E-06 | 0.94 (0.92, 0.97)   |
| 440.22      | Atherosclerosis of native arteries of the extremities with intermittent claudication | 1.57           | 3.92E-06 | 0.9 (0.87, 0.94)    |
| 443.9       | Peripheral vascular disease, unspecified                                             | 6.49           | 5.02E-06 | 0.95 (0.93, 0.97)   |
| 440.2       | Atherosclerosis of the extremities                                                   | 2.35           | 9.73E-06 | 0.92 (0.89, 0.96)   |
| 440         | Atherosclerosis                                                                      | 3.09           | 1.80E-05 | 0.93 (0.91, 0.96)   |
| 443         | Peripheral vascular disease                                                          | 6.94           | 3.87E-05 | 0.96 (0.94, 0.98)   |
| 702         | Degenerative skin conditions and other dermatoses                                    | 19.42          | 1.72E-04 | 1.03 (1.01, 1.04)   |
| 736.2       | Acquired deformities of finger                                                       | 0.3            | 2.57E-04 | 1.19 (1.09, 1.31)   |
| 442.2       | Aneurysm of iliac artery                                                             | 0.27           | 2.73E-04 | 0.83 (0.75, 0.92)   |
| 690.1       | Seborrheic dermatitis                                                                | 4.53           | 3.30E-04 | 1.05 (1.02, 1.07)   |
| 507         | Pleurisy; pleural effusion                                                           | 1.83           | 3.47E-04 | 1.07 (1.03, 1.12)   |
| 939         | Atopic/contact dermatitis due to other or unspecified                                | 11.93          | 3.72E-04 | 1.03 (1.01, 1.05)   |
| 588         | Disorders resulting from impaired renal function                                     | 1.06           | 4.92E-04 | 1.1 (1.04, 1.16)    |
| 690         | Erythematousquamous dermatosis                                                       | 4.58           | 5.10E-04 | 1.04 (1.02, 1.07)   |
| 274.11      | Gouty arthropathy                                                                    | 1.49           | 5.23E-04 | 1.08 (1.03, 1.13)   |
| 371.2       | Conjunctivitis, noninfectious                                                        | 1.41           | 6.60E-04 | 1.08 (1.03, 1.13)   |
| 411.3       | Angina pectoris                                                                      | 4.1            | 9.43E-04 | 0.96 (0.93, 0.98)   |
| 274         | Gout and other crystal arthropathies                                                 | 8.32           | 1.01E-03 | 1.03 (1.01, 1.05)   |
| 702.1       | Actinic keratosis                                                                    | 13.4           | 1.12E-03 | 1.03 (1.01, 1.04)   |

| PheWAS code | Phenotype description                                           | Prevalence (%) | p-value  | Odds Ratio (95% CI) |
|-------------|-----------------------------------------------------------------|----------------|----------|---------------------|
| 274.1       | Gout                                                            | 8.06           | 1.27E-03 | 1.03 (1.01, 1.05)   |
| 371.21      | Allergic conjunctivitis                                         | 1.28           | 1.69E-03 | 1.08 (1.03, 1.13)   |
| 769         | Nonallopathic lesions<br>NEC                                    | 1.48           | 1.99E-03 | 1.07 (1.02, 1.12)   |
| 338         | Pain                                                            | 6.14           | 2.23E-03 | 1.04 (1.01, 1.06)   |
| 433.11      | Occlusion of cerebral<br>arteries, with cerebral<br>infarction  | 0.36           | 2.65E-03 | 0.88 (0.8, 0.96)    |
| 215         | Other benign neoplasm<br>of connective and other<br>soft tissue | 0.5            | 2.91E-03 | 1.12 (1.04, 1.21)   |
| 594.1       | Calculus of kidney                                              | 5              | 3.66E-03 | 1.04 (1.01, 1.06)   |
| 588.2       | Secondary<br>hyperparathyroidism (of<br>renal origin)           | 0.82           | 3.68E-03 | 1.09 (1.03, 1.16)   |
| 295.2       | Paranoid disorders                                              | 0.42           | 3.76E-03 | 1.13 (1.04, 1.23)   |
| 594         | Urinary calculus                                                | 6.02           | 3.76E-03 | 1.03 (1.01, 1.05)   |
| 585.31      | Renal dialysis                                                  | 0.82           | 4.19E-03 | 1.1 (1.03, 1.17)    |
| 760         | Back pain                                                       | 41.8           | 4.56E-03 | 1.02 (1.01, 1.03)   |
| 1013        | Asphyxia and<br>hypoxemia                                       | 1.74           | 4.84E-03 | 1.06 (1.02, 1.1)    |
| 338.2       | Chronic pain                                                    | 5.31           | 5.26E-03 | 1.03 (1.01, 1.06)   |
| 740.1       | Osteoarthritis; localized                                       | 11.78          | 5.38E-03 | 1.02 (1.01, 1.04)   |
| 411.1       | Unstable angina<br>(intermediate coronary<br>syndrome)          | 2.27           | 5.46E-03 | 0.95 (0.92, 0.99)   |
| 250.2       | Type 2 diabetes                                                 | 32.81          | 5.73E-03 | 0.98 (0.97, 1)      |
| 603.1       | Hydrocele                                                       | 1.06           | 5.75E-03 | 1.07 (1.02, 1.13)   |
| 555.1       | Regional enteritis                                              | 0.55           | 5.89E-03 | 0.91 (0.85, 0.97)   |
| 250         | Diabetes mellitus                                               | 33.03          | 6.15E-03 | 0.98 (0.97, 1)      |
| 709.2       | Sicca syndrome                                                  | 0.19           | 6.55E-03 | 0.84 (0.75, 0.95)   |
| 472         | Chronic pharyngitis and<br>nasopharyngitis                      | 3.7            | 6.65E-03 | 1.04 (1.01, 1.07)   |
| 427         | Cardiac dysrhythmias                                            | 22.58          | 7.55E-03 | 0.98 (0.97, 1)      |
| 474.1       | Acute tonsillitis                                               | 0.17           | 8.17E-03 | 1.19 (1.05, 1.35)   |
| 350.3       | Lack of coordination                                            | 0.65           | 8.38E-03 | 0.92 (0.86, 0.98)   |
| 260.3       | Adult failure to thrive                                         | 0.24           | 8.54E-03 | 0.86 (0.77, 0.96)   |
| 743.11      | Osteoporosis NOS                                                | 3.02           | 8.54E-03 | 1.04 (1.01, 1.07)   |
| 530.13      | Barrett's esophagus                                             | 1.95           | 8.77E-03 | 1.05 (1.01, 1.09)   |
| 285         | Other anemias                                                   | 15.1           | 8.77E-03 | 0.98 (0.96, 0.99)   |
| 598         | Abnormal findings on<br>examination of urine                    | 1.15           | 8.93E-03 | 1.07 (1.02, 1.12)   |
| 362.27      | Drusen (degenerative) of<br>retina                              | 1.08           | 1.00E-02 | 0.94 (0.89, 0.98)   |
| 473.4       | Voice disturbance                                               | 2.63           | 1.05E-02 | 0.96 (0.93, 0.99)   |
| 132         | Infestation (lice, mites)                                       | 0.29           | 1.11E-02 | 0.88 (0.8, 0.97)    |
| 401.1       | Essential hypertension                                          | 67.89          | 1.13E-02 | 0.98 (0.97, 1)      |
| 401         | Hypertension                                                    | 68.08          | 1.14E-02 | 0.98 (0.97, 1)      |

| PheWAS code | Phenotype description                                             | Prevalence (%) | p-value  | Odds Ratio (95% CI) |
|-------------|-------------------------------------------------------------------|----------------|----------|---------------------|
| 473         | Diseases of the larynx and vocal cords                            | 3.26           | 1.17E-02 | 0.96 (0.93, 0.99)   |
| 414         | Other forms of chronic heart disease                              | 2.65           | 1.29E-02 | 0.96 (0.93, 0.99)   |
| 703         | Diseases of nail, NOS                                             | 5.69           | 1.34E-02 | 0.97 (0.95, 0.99)   |
| 496.3       | Bronchiectasis                                                    | 0.27           | 1.39E-02 | 0.88 (0.8, 0.97)    |
| 427.21      | Atrial fibrillation                                               | 9.23           | 1.47E-02 | 0.98 (0.96, 1)      |
| 280.1       | Iron deficiency anemias, unspecified or not due to blood loss     | 5.1            | 1.47E-02 | 0.97 (0.95, 0.99)   |
| 306         | Other mental disorder                                             | 8.11           | 1.50E-02 | 1.03 (1, 1.05)      |
| 362.9       | Retinal edema                                                     | 1.04           | 1.53E-02 | 0.94 (0.89, 0.99)   |
| 452.2       | Deep vein thrombosis [DVT]                                        | 1.98           | 1.54E-02 | 1.05 (1.01, 1.09)   |
| 720         | Spinal stenosis                                                   | 6.65           | 1.66E-02 | 1.03 (1, 1.05)      |
| 306.9       | Tension headache                                                  | 0.41           | 1.66E-02 | 1.11 (1.02, 1.2)    |
| 244         | Hypothyroidism                                                    | 10.09          | 1.67E-02 | 0.98 (0.96, 1)      |
| 227.2       | Benign neoplasm of parathyroid gland                              | 0.1            | 1.67E-02 | 1.22 (1.04, 1.43)   |
| 427.2       | Atrial fibrillation and flutter                                   | 9.69           | 1.70E-02 | 0.98 (0.96, 1)      |
| 603         | Other disorders of testis                                         | 1.4            | 1.73E-02 | 1.06 (1.01, 1.1)    |
| 480.5       | Bronchopneumonia and lung abscess                                 | 0.11           | 1.76E-02 | 0.82 (0.7, 0.97)    |
| 71.1        | HIV infection, symptomatic                                        | 1.22           | 1.76E-02 | 1.06 (1.01, 1.12)   |
| 681         | Superficial cellulitis and abscess                                | 12.95          | 1.80E-02 | 1.02 (1, 1.04)      |
| 286.2       | Encounter for long-term (current) use of anticoagulants           | 10.18          | 1.81E-02 | 0.98 (0.96, 1)      |
| 764         | Sciatica                                                          | 3.15           | 1.83E-02 | 1.04 (1.01, 1.07)   |
| 496.21      | Obstructive chronic bronchitis                                    | 2.29           | 1.86E-02 | 0.96 (0.93, 0.99)   |
| 495         | Asthma                                                            | 7.16           | 1.87E-02 | 1.02 (1, 1.05)      |
| 371         | Inflammation of the eye                                           | 9.01           | 1.88E-02 | 1.02 (1, 1.04)      |
| 244.4       | Hypothyroidism NOS                                                | 9.8            | 1.89E-02 | 0.98 (0.96, 1)      |
| 715.2       | Ankylosing spondylitis                                            | 0.29           | 1.94E-02 | 0.89 (0.81, 0.98)   |
| 689         | Disorder of skin and subcutaneous tissue NOS                      | 6.72           | 2.00E-02 | 1.02 (1, 1.05)      |
| 280         | Iron deficiency anemias                                           | 5.45           | 2.00E-02 | 0.97 (0.95, 1)      |
| 695.3       | Rosacea                                                           | 2.2            | 2.03E-02 | 1.04 (1.01, 1.08)   |
| 291         | Other specified nonpsychotic and/or transient mental disorders    | 1.42           | 2.04E-02 | 1.05 (1.01, 1.1)    |
| 528         | Diseases of the oral soft tissues, excluding lesions specific for | 2.07           | 2.08E-02 | 1.04 (1.01, 1.08)   |

| PheWAS code | Phenotype description                                               | Prevalence (%) | p-value  | Odds Ratio (95% CI) |
|-------------|---------------------------------------------------------------------|----------------|----------|---------------------|
|             | gingiva and tongue                                                  |                |          |                     |
| 339         | Other headache syndromes                                            | 11.85          | 2.09E-02 | 1.02 (1, 1.04)      |
| 1005        | Other symptoms                                                      | 7.31           | 2.27E-02 | 0.98 (0.96, 1)      |
| 598.9       | Other nonspecific findings on examination of urine                  | 1.07           | 2.30E-02 | 1.06 (1.01, 1.12)   |
| 523         | Gingival and periodontal diseases                                   | 15.82          | 2.30E-02 | 1.02 (1, 1.03)      |
| 261         | Vitamin deficiency                                                  | 13.61          | 2.37E-02 | 1.02 (1, 1.03)      |
| 743.1       | Osteoporosis                                                        | 3.13           | 2.53E-02 | 1.03 (1, 1.07)      |
| 573         | Other disorders of liver                                            | 1.07           | 2.54E-02 | 1.06 (1.01, 1.11)   |
| 447         | Other disorders of arteries and arterioles                          | 0.58           | 2.54E-02 | 1.08 (1.01, 1.16)   |
| 703.1       | Ingrowing nail                                                      | 4.2            | 2.57E-02 | 1.03 (1, 1.06)      |
| 745         | Pain in joint                                                       | 53.2           | 2.66E-02 | 1.01 (1, 1.03)      |
| 465         | Acute upper respiratory infections of multiple or unspecified sites | 15.77          | 2.80E-02 | 1.02 (1, 1.03)      |
| 372         | Disorders of conjunctiva                                            | 2.03           | 2.84E-02 | 0.96 (0.92, 1)      |
| 335         | Multiple sclerosis                                                  | 0.55           | 2.84E-02 | 0.92 (0.86, 0.99)   |
| 568         | Other disorders of peritoneum                                       | 0.35           | 3.01E-02 | 0.91 (0.83, 0.99)   |
| 754.2       | Spondylolisthesis, congenital                                       | 0.37           | 3.04E-02 | 1.1 (1.01, 1.19)    |
| 71          | Human immunodeficiency virus [HIV] disease                          | 1.25           | 3.15E-02 | 1.06 (1, 1.11)      |
| 750         | Digestive congenital anomalies                                      | 0.21           | 3.18E-02 | 1.13 (1.01, 1.26)   |
| 334.1       | Spinocerebellar disease                                             | 0.14           | 3.27E-02 | 0.86 (0.75, 0.99)   |
| 720.1       | Spinal stenosis of lumbar region                                    | 4.05           | 3.44E-02 | 1.03 (1, 1.06)      |
| 771.2       | Cramp of limb                                                       | 1.1            | 3.64E-02 | 0.95 (0.9, 1)       |
| 301.2       | Antisocial/borderline personality disorder                          | 1.51           | 3.68E-02 | 1.05 (1, 1.1)       |
| 626.8       | Infertility, female                                                 | 0.13           | 3.85E-02 | 0.84 (0.72, 0.99)   |
| 550.4       | Umbilical hernia                                                    | 2.34           | 3.85E-02 | 1.04 (1, 1.07)      |
| 456         | Chronic venous insufficiency [CVI]                                  | 3.6            | 3.91E-02 | 1.03 (1, 1.06)      |
| 377         | Disorders of optic nerve and visual pathways                        | 1.75           | 3.99E-02 | 0.96 (0.92, 1)      |
| 255         | Disorders of adrenal glands                                         | 0.85           | 3.99E-02 | 0.94 (0.89, 1)      |
| 912         | Insect bite                                                         | 0.68           | 4.00E-02 | 1.07 (1, 1.14)      |
| 327.71      | Restless legs syndrome                                              | 1.83           | 4.01E-02 | 0.96 (0.93, 1)      |
| 575.8       | Other disorders of biliary tract                                    | 0.21           | 4.08E-02 | 1.12 (1, 1.26)      |

| PheWAS code | Phenotype description                                            | Prevalence (%) | p-value  | Odds Ratio (95% CI) |
|-------------|------------------------------------------------------------------|----------------|----------|---------------------|
| 687.4       | Disturbance of skin sensation                                    | 6.49           | 4.09E-02 | 1.02 (1, 1.05)      |
| 296.1       | Bipolar                                                          | 5.8            | 4.14E-02 | 1.02 (1, 1.05)      |
| 555         | Inflammatory bowel disease and other gastroenteritis and colitis | 1.21           | 4.15E-02 | 0.95 (0.91, 1)      |
| 687.1       | Rash and other nonspecific skin eruption                         | 6.66           | 4.40E-02 | 1.02 (1, 1.04)      |
| 738.4       | Acquired spondylolisthesis                                       | 0.34           | 4.41E-02 | 1.09 (1, 1.19)      |
| 722         | Intervertebral disc disorders                                    | 13.57          | 4.46E-02 | 1.02 (1, 1.03)      |
| 695         | Erythematous conditions                                          | 5.1            | 4.50E-02 | 1.02 (1, 1.05)      |
| 452         | Other venous embolism and thrombosis                             | 4.17           | 4.52E-02 | 1.03 (1, 1.06)      |
| 726         | Peripheral enthesopathies and allied syndromes                   | 19.39          | 4.57E-02 | 1.01 (1, 1.03)      |
| 292.6       | Hallucinations                                                   | 0.2            | 4.62E-02 | 1.13 (1, 1.28)      |
| 289.8       | Polycythemia vera, secondary                                     | 0.52           | 4.66E-02 | 1.07 (1, 1.15)      |
| 172.2       | Other non-epithelial cancer of skin                              | 9.99           | 4.78E-02 | 1.02 (1, 1.04)      |
| 204.22      | Myeloid leukemia, chronic                                        | 0.13           | 4.82E-02 | 1.15 (1, 1.31)      |
| 727.6       | Rupture of tendon, nontraumatic                                  | 2.31           | 4.83E-02 | 1.04 (1, 1.07)      |
| 540         | Appendiceal conditions                                           | 0.57           | 4.83E-02 | 0.93 (0.87, 1)      |
| 1002        | Symptoms concerning nutrition, metabolism, and development       | 3.68           | 4.85E-02 | 0.97 (0.94, 1)      |
| 362.2       | Degeneration of macula and posterior pole of retina              | 8.18           | 4.95E-02 | 0.98 (0.96, 1)      |
| 601.12      | Chronic prostatitis                                              | 0.87           | 4.97E-02 | 1.06 (1, 1.12)      |
| 286.9       | Abnormal coagulation profile                                     | 0.53           | 5.10E-02 | 0.93 (0.86, 1)      |
| 754         | Congenital musculoskeletal deformities of spine                  | 0.52           | 5.11E-02 | 1.07 (1, 1.15)      |
| 256.4       | Polycystic ovaries                                               | 0.13           | 5.19E-02 | 0.86 (0.73, 1)      |
| 915         | Superficial injury without mention of infection                  | 2.47           | 5.26E-02 | 1.03 (1, 1.07)      |
| 53          | Herpes zoster                                                    | 2.24           | 5.38E-02 | 1.03 (1, 1.07)      |
| 509.8       | Dependence on respirator [Ventilator] or supplemental oxygen     | 0.91           | 5.40E-02 | 1.05 (1, 1.11)      |
| 530.12      | Ulcer of esophagus                                               | 0.44           | 5.40E-02 | 1.08 (1, 1.16)      |
| 736         | Other acquired deformities of limbs                              | 2.12           | 5.42E-02 | 1.04 (1, 1.07)      |
| 345.12      | Partial epilepsy                                                 | 0.52           | 5.42E-02 | 1.07 (1, 1.15)      |

| <b>PheWAS code</b> | <b>Phenotype description</b>                               | <b>Prevalence (%)</b> | <b>p-value</b> | <b>Odds Ratio (95% CI)</b> |
|--------------------|------------------------------------------------------------|-----------------------|----------------|----------------------------|
| 189                | Cancer of urinary organs<br>(incl. kidney and bladder)     | 2.59                  | 5.52E-02       | 1.03 (1, 1.07)             |
| 772                | Symptoms of the muscles                                    | 0.46                  | 5.52E-02       | 1.08 (1, 1.17)             |
| 557.1              | Celiac disease                                             | 0.19                  | 5.59E-02       | 1.12 (1, 1.25)             |
| 516                | Abnormal sputum                                            | 0.89                  | 5.63E-02       | 0.95 (0.89, 1)             |
| 426.92             | Cardiac defibrillator in situ                              | 1.77                  | 5.67E-02       | 0.96 (0.92, 1)             |
| 296                | Mood disorders                                             | 40.42                 | 5.78E-02       | 1.01 (1, 1.02)             |
| 947                | Urticaria                                                  | 1.08                  | 5.81E-02       | 1.05 (1, 1.11)             |
| 480                | Pneumonia                                                  | 5.88                  | 5.82E-02       | 1.02 (1, 1.05)             |
| 451.2              | Phlebitis and thrombophlebitis of lower extremities        | 0.39                  | 5.90E-02       | 0.92 (0.85, 1)             |
| 772.2              | Spasm of muscle                                            | 2.12                  | 5.99E-02       | 1.04 (1, 1.08)             |
| 272.1              | Hyperlipidemia                                             | 67.23                 | 6.03E-02       | 0.99 (0.98, 1)             |
| 381.3              | Mastoiditis & related conditions                           | 0.2                   | 6.09E-02       | 1.11 (1, 1.24)             |
| 368.1              | Amblyopia                                                  | 0.99                  | 6.13E-02       | 0.95 (0.9, 1)              |
| 364.4              | Corneal degenerations                                      | 0.6                   | 6.20E-02       | 1.07 (1, 1.14)             |
| 362.23             | Cystoid macular degeneration of retina                     | 1.23                  | 6.26E-02       | 0.96 (0.91, 1)             |
| 721                | Spondylosis and allied disorders                           | 9.72                  | 6.28E-02       | 1.02 (1, 1.04)             |
| 571.5              | Other chronic nonalcoholic liver disease                   | 3.45                  | 6.52E-02       | 1.03 (1, 1.06)             |
| 496.2              | Chronic bronchitis                                         | 2.92                  | 6.52E-02       | 0.97 (0.94, 1)             |
| 327.7              | Sleep related movement disorders                           | 2.33                  | 6.58E-02       | 0.97 (0.94, 1)             |
| 736.4              | Genu valgum or varum (acquired)                            | 0.19                  | 6.66E-02       | 1.11 (0.99, 1.25)          |
| 204.4              | Multiple myeloma                                           | 0.29                  | 6.75E-02       | 1.1 (0.99, 1.21)           |
| 370.1              | Corneal ulcer                                              | 0.24                  | 6.77E-02       | 1.1 (0.99, 1.22)           |
| 256                | Ovarian dysfunction                                        | 0.14                  | 6.85E-02       | 0.87 (0.75, 1.01)          |
| 272                | Disorders of lipid metabolism                              | 67.28                 | 6.88E-02       | 0.99 (0.98, 1)             |
| 573.3              | Hepatomegaly                                               | 0.37                  | 7.23E-02       | 1.08 (0.99, 1.18)          |
| 255.1              | Adrenal hyperfunction                                      | 0.24                  | 7.23E-02       | 0.9 (0.81, 1.01)           |
| 303.4              | Somatoform disorder                                        | 1.79                  | 7.33E-02       | 1.04 (1, 1.08)             |
| 946                | Anaphylactic shock NOS                                     | 0.55                  | 7.39E-02       | 0.93 (0.86, 1.01)          |
| 291.4              | Specific nonpsychotic mental disorders due to brain damage | 0.72                  | 7.42E-02       | 1.06 (0.99, 1.12)          |
| 731.1              | Osteitis deformans [Paget's disease of bone]               | 0.12                  | 7.43E-02       | 1.15 (0.99, 1.34)          |
| 574.1              | Cholelithiasis                                             | 2.86                  | 7.46E-02       | 1.03 (1, 1.06)             |
| 301                | Personality disorders                                      | 4.02                  | 7.49E-02       | 1.03 (1, 1.06)             |

| <b>PheWAS code</b> | <b>Phenotype description</b>                                 | <b>Prevalence</b> | <b>p-value</b> | <b>Odds Ratio (95% CI)</b> |
|--------------------|--------------------------------------------------------------|-------------------|----------------|----------------------------|
| 252                | Disorders of parathyroid gland                               | 0.84              | 7.55E-02       | 1.05 (0.99, 1.12)          |
| 196                | Radiotherapy                                                 | 1.17              | 7.64E-02       | 1.05 (1, 1.1)              |
| 315                | Developmental delays and disorders                           | 0.29              | 7.69E-02       | 1.09 (0.99, 1.2)           |
| 540.1              | Appendicitis                                                 | 0.54              | 7.71E-02       | 0.94 (0.87, 1.01)          |
| 216.1              | Screening for malignant neoplasms of the skin                | 2.64              | 7.73E-02       | 1.03 (1, 1.06)             |
| 389.2              | Conductive hearing loss                                      | 0.82              | 7.93E-02       | 1.05 (0.99, 1.11)          |
| 599.9              | Other abnormality of urination                               | 2.28              | 7.95E-02       | 1.03 (1, 1.07)             |
| 428                | Congestive heart failure; nonhypertensive                    | 8.61              | 7.99E-02       | 0.98 (0.96, 1)             |
| 374                | Other disorders of eyelids                                   | 4.48              | 8.04E-02       | 1.02 (1, 1.05)             |
| 702.2              | Seborrheic keratosis                                         | 10.69             | 8.04E-02       | 1.02 (1, 1.03)             |
| 366                | Cataract                                                     | 39.15             | 8.26E-02       | 0.99 (0.98, 1)             |
| 244.1              | Secondary hypothyroidism                                     | 0.59              | 8.27E-02       | 0.94 (0.88, 1.01)          |
| 260.2              | severe protein-calorie malnutrition                          | 0.11              | 8.33E-02       | 1.15 (0.98, 1.34)          |
| 573.2              | Liver replaced by transplant                                 | 0.18              | 8.39E-02       | 0.9 (0.79, 1.01)           |
| 574                | Cholelithiasis and cholecystitis                             | 3.49              | 8.40E-02       | 1.03 (1, 1.05)             |
| 303                | Psychogenic and somatoform disorders                         | 2                 | 8.46E-02       | 1.03 (1, 1.07)             |
| 153.2              | Colon cancer                                                 | 1.66              | 8.50E-02       | 1.04 (1, 1.08)             |
| 698                | Pruritus and related conditions                              | 2.24              | 8.55E-02       | 1.03 (1, 1.07)             |
| 276.5              | Hypovolemia                                                  | 3.08              | 8.57E-02       | 1.03 (1, 1.06)             |
| 530.14             | Reflux esophagitis                                           | 1.18              | 8.65E-02       | 1.04 (0.99, 1.09)          |
| 763                | Thoracic or lumbosacral neuritis or radiculitis, unspecified | 6.53              | 8.68E-02       | 1.02 (1, 1.04)             |
| 395                | Heart valve disorders                                        | 5.05              | 8.79E-02       | 0.98 (0.96, 1)             |
| 500                | Lung disease due to external agents                          | 0.48              | 8.81E-02       | 1.07 (0.99, 1.15)          |
| 172                | Skin cancer                                                  | 11.13             | 8.82E-02       | 1.01 (1, 1.03)             |
| 271                | Disorders of carbohydrate transport and metabolism           | 0.67              | 8.83E-02       | 1.06 (0.99, 1.13)          |
| 277.7              | Dysmetabolic syndrome X                                      | 0.65              | 8.86E-02       | 1.06 (0.99, 1.13)          |
| 428.1              | Congestive heart failure (CHF) NOS                           | 7.9               | 8.90E-02       | 0.98 (0.96, 1)             |
| 840.2              | Rotator cuff (capsule) sprain                                | 2.35              | 9.01E-02       | 1.03 (1, 1.07)             |
| 242.1              | Graves' disease                                              | 0.42              | 9.17E-02       | 0.93 (0.85, 1.01)          |
| 618                | Genital prolapse                                             | 0.29              | 9.30E-02       | 1.09 (0.99, 1.2)           |
| 574.11             | Cholelithiasis with acute                                    | 0.16              | 9.34E-02       | 0.9 (0.79, 1.02)           |



| PheWAS code | Phenotype description                                                             | Prevalence (%) | p-value  | Odds Ratio (95% CI) |
|-------------|-----------------------------------------------------------------------------------|----------------|----------|---------------------|
| 627.2       | cholecystitis<br>Symptomatic menopause                                            | 1.8            | 9.56E-02 | 1.04 (0.99, 1.1)    |
| 362.4       | Retinal vascular changes and abnormalities                                        | 1.95           | 9.64E-02 | 0.97 (0.93, 1.01)   |
| 870.1       | Open wound or laceration of eye or eyelid                                         | 0.3            | 9.67E-02 | 0.92 (0.83, 1.02)   |
| 189.21      | Malignant neoplasm of bladder                                                     | 1.53           | 9.67E-02 | 1.04 (0.99, 1.08)   |
| 540.11      | Acute appendicitis                                                                | 0.44           | 9.75E-02 | 0.94 (0.87, 1.01)   |
| 516.1       | Hemoptysis                                                                        | 0.83           | 9.82E-02 | 0.95 (0.9, 1.01)    |
| 362.8       | Retinal hemorrhage/ischemia                                                       | 0.72           | 9.87E-02 | 0.95 (0.89, 1.01)   |
| 255.12      | Hyperaldosteronism                                                                | 0.2            | 9.94E-02 | 0.9 (0.79, 1.02)    |
| 252.1       | Hyperparathyroidism                                                               | 0.77           | 9.98E-02 | 1.05 (0.99, 1.12)   |
| 261.4       | Vitamin D deficiency                                                              | 10.14          | 1.01E-01 | 1.01 (1, 1.03)      |
| 271.3       | Intestinal disaccharidase deficiencies and disaccharide malabsorption             | 0.57           | 1.01E-01 | 1.06 (0.99, 1.14)   |
| 287.32      | Secondary thrombocytopenia                                                        | 0.19           | 1.01E-01 | 0.9 (0.8, 1.02)     |
| 753         | Congenital anomalies of the eye                                                   | 0.22           | 1.02E-01 | 1.1 (0.98, 1.23)    |
| 276         | Disorders of fluid, electrolyte, and acid-base balance                            | 11.64          | 1.02E-01 | 1.01 (1, 1.03)      |
| 568.1       | Peritoneal adhesions (postoperative) (postinfection)                              | 0.28           | 1.04E-01 | 0.92 (0.84, 1.02)   |
| 771.1       | Swelling of limb                                                                  | 1.88           | 1.05E-01 | 1.03 (0.99, 1.07)   |
| 191.1       | Cancer of brain and nervous system                                                | 0.16           | 1.05E-01 | 0.9 (0.79, 1.02)    |
| 371.3       | Inflammation of eyelids                                                           | 6.49           | 1.05E-01 | 1.02 (1, 1.04)      |
| 572         | Ascites (nonmalignant)                                                            | 0.62           | 1.06E-01 | 1.06 (0.99, 1.13)   |
| 742.2       | Pathological, developmental or recurrent dislocation                              | 0.22           | 1.07E-01 | 1.09 (0.98, 1.22)   |
| 362         | Other retinal disorders                                                           | 14.3           | 1.07E-01 | 0.99 (0.97, 1)      |
| 627         | Menopausal and postmenopausal disorders                                           | 2.45           | 1.09E-01 | 1.04 (0.99, 1.09)   |
| 571         | Chronic liver disease and cirrhosis                                               | 3.69           | 1.10E-01 | 1.02 (0.99, 1.05)   |
| 596.1       | Bladder neck obstruction                                                          | 1              | 1.11E-01 | 1.04 (0.99, 1.1)    |
| 440.21      | Atherosclerosis of native arteries of the extremities with ulceration or gangrene | 0.4            | 1.11E-01 | 0.93 (0.86, 1.02)   |

| PheWAS code | Phenotype description                                                | Prevalence (%) | p-value  | Odds Ratio (95% CI) |
|-------------|----------------------------------------------------------------------|----------------|----------|---------------------|
| 781         | Symptoms involving nervous and musculoskeletal systems               | 0.68           | 1.12E-01 | 1.05 (0.99, 1.12)   |
| 41.11       | Methicillin sensitive Staphylococcus aureus                          | 0.68           | 1.14E-01 | 0.95 (0.89, 1.01)   |
| 420.2       | Pericarditis                                                         | 0.53           | 1.15E-01 | 1.06 (0.99, 1.14)   |
| 739         | Contracture of joint                                                 | 0.4            | 1.18E-01 | 1.07 (0.98, 1.16)   |
| 276.11      | Hyperosmolality and/or hypernatremia                                 | 0.15           | 1.18E-01 | 0.89 (0.78, 1.03)   |
| 153         | Colorectal cancer                                                    | 1.92           | 1.18E-01 | 1.03 (0.99, 1.07)   |
| 840.1       | Muscle/tendon sprain                                                 | 0.22           | 1.18E-01 | 1.09 (0.98, 1.22)   |
| 444         | Arterial embolism and thrombosis                                     | 0.66           | 1.18E-01 | 0.95 (0.89, 1.01)   |
| 807         | Fracture of ribs                                                     | 0.86           | 1.20E-01 | 0.96 (0.91, 1.01)   |
| 585.32      | End stage renal disease                                              | 1.21           | 1.20E-01 | 1.04 (0.99, 1.1)    |
| 227.3       | Benign neoplasm of pituitary gland and craniopharyngeal duct (pouch) | 0.41           | 1.22E-01 | 0.94 (0.86, 1.02)   |
| 340         | Migraine                                                             | 5.7            | 1.22E-01 | 1.02 (0.99, 1.04)   |
| 327.6       | Circadian rhythm sleep disorder                                      | 0.14           | 1.23E-01 | 1.11 (0.97, 1.28)   |
| 500.2       | Pneumoconiosis                                                       | 0.38           | 1.24E-01 | 1.07 (0.98, 1.16)   |
| 836         | Traumatic arthropathy                                                | 1.29           | 1.24E-01 | 0.96 (0.92, 1.01)   |
| 303.1       | Dissociative disorder                                                | 0.11           | 1.24E-01 | 1.13 (0.97, 1.32)   |
| 189.11      | Malignant neoplasm of kidney, except pelvis                          | 0.95           | 1.24E-01 | 1.04 (0.99, 1.1)    |
| 277.4       | Disorders of bilirubin excretion                                     | 0.22           | 1.26E-01 | 1.09 (0.98, 1.21)   |
| 279         | Disorders involving the immune mechanism                             | 0.26           | 1.26E-01 | 1.08 (0.98, 1.2)    |
| 772.1       | Muscular wasting and disuse atrophy                                  | 0.24           | 1.26E-01 | 1.09 (0.98, 1.21)   |
| 575.1       | Cholangitis                                                          | 0.16           | 1.28E-01 | 0.9 (0.79, 1.03)    |
| 250.1       | Type 1 diabetes                                                      | 3.36           | 1.28E-01 | 0.98 (0.95, 1.01)   |
| 592.12      | Chronic cystitis                                                     | 0.14           | 1.28E-01 | 1.11 (0.97, 1.27)   |
| 426.25      | Other heart block                                                    | 0.16           | 1.30E-01 | 1.1 (0.97, 1.25)    |
| 601.3       | Orchitis and epididymitis                                            | 1.28           | 1.30E-01 | 1.04 (0.99, 1.09)   |
| 501         | Pneumonitis due to inhalation of food or vomitus                     | 0.34           | 1.31E-01 | 0.93 (0.85, 1.02)   |
| 227.1       | Benign neoplasm of adrenal gland                                     | 0.37           | 1.31E-01 | 0.93 (0.86, 1.02)   |
| 275.1       | Disorders of iron metabolism                                         | 0.52           | 1.32E-01 | 1.06 (0.98, 1.13)   |
| 276.13      | Hyperpotassemia                                                      | 2.56           | 1.32E-01 | 1.03 (0.99, 1.06)   |
| 716.1       | Unspecified polyarthropathy or polyarthritis                         | 0.28           | 1.32E-01 | 1.08 (0.98, 1.19)   |
| 369         | Infection of the eye                                                 | 2.54           | 1.34E-01 | 1.03 (0.99, 1.06)   |

| <b>PheWAS code</b> | <b>Phenotype description</b>                                        | <b>Prevalence (%)</b> | <b>p-value</b> | <b>Odds Ratio (95% CI)</b> |
|--------------------|---------------------------------------------------------------------|-----------------------|----------------|----------------------------|
| 521                | Diseases of hard tissues of teeth                                   | 17.75                 | 1.34E-01       | 1.01 (1, 1.03)             |
| 585.2              | Renal failure NOS                                                   | 1.72                  | 1.34E-01       | 1.03 (0.99, 1.08)          |
| 366.2              | Senile cataract                                                     | 30.85                 | 1.34E-01       | 0.99 (0.98, 1)             |
| 401.21             | Hypertensive heart disease                                          | 0.82                  | 1.37E-01       | 0.96 (0.9, 1.01)           |
| 448                | Disease of capillaries                                              | 0.14                  | 1.38E-01       | 1.11 (0.97, 1.26)          |
| 571.8              | Liver abscess and sequelae of chronic liver disease                 | 0.73                  | 1.39E-01       | 1.05 (0.99, 1.11)          |
| 743.13             | Other specified osteoporosis                                        | 0.16                  | 1.39E-01       | 0.91 (0.8, 1.03)           |
| 189.1              | Cancer of kidney and renal pelvis                                   | 1.04                  | 1.40E-01       | 1.04 (0.99, 1.09)          |
| 253                | Disorders of the pituitary gland and its hypothalamic control       | 1.15                  | 1.41E-01       | 0.96 (0.92, 1.01)          |
| 285.1              | Acute posthemorrhagic anemia                                        | 0.31                  | 1.42E-01       | 1.07 (0.98, 1.18)          |
| 367                | Disorders of refraction and accommodation; blindness and low vision | 55.42                 | 1.42E-01       | 0.99 (0.98, 1)             |
| 189.2              | Cancer of bladder                                                   | 1.64                  | 1.44E-01       | 1.03 (0.99, 1.07)          |
| 286.81             | Primary hypercoagulable state                                       | 0.35                  | 1.47E-01       | 1.07 (0.98, 1.16)          |
| 571.81             | Portal hypertension                                                 | 0.38                  | 1.48E-01       | 1.06 (0.98, 1.16)          |
| 227                | Benign neoplasm of other endocrine glands and related structures    | 0.89                  | 1.49E-01       | 0.96 (0.91, 1.02)          |
| 246.7              | Abnormal results of function study of thyroid                       | 0.42                  | 1.50E-01       | 0.94 (0.87, 1.02)          |
| 368                | Visual disturbances                                                 | 8.56                  | 1.50E-01       | 0.99 (0.97, 1.01)          |
| 619.2              | Disorders of uterus, NEC                                            | 0.52                  | 1.53E-01       | 1.06 (0.98, 1.15)          |
| 707                | Chronic ulcer of skin                                               | 4.28                  | 1.53E-01       | 1.02 (0.99, 1.05)          |
| 622                | Polyp of female genital organs                                      | 0.15                  | 1.53E-01       | 0.9 (0.78, 1.04)           |
| 38                 | Septicemia                                                          | 2.06                  | 1.53E-01       | 1.03 (0.99, 1.07)          |
| 440.1              | Atherosclerosis of renal artery                                     | 0.18                  | 1.54E-01       | 0.91 (0.81, 1.03)          |
| 426.9              | Cardiac pacemaker/device in situ                                    | 3.81                  | 1.55E-01       | 0.98 (0.95, 1.01)          |
| 300.13             | Phobia                                                              | 0.23                  | 1.55E-01       | 1.08 (0.97, 1.21)          |
| 377.3              | Optic neuritis/neuropathy                                           | 0.62                  | 1.59E-01       | 0.95 (0.89, 1.02)          |
| 374.2              | Lagophthalmos                                                       | 0.15                  | 1.60E-01       | 1.1 (0.96, 1.25)           |
| 585                | Renal failure                                                       | 13.87                 | 1.60E-01       | 0.99 (0.97, 1)             |
| 578.8              | Hemorrhage of rectum and anus                                       | 3.17                  | 1.61E-01       | 1.02 (0.99, 1.05)          |
| 296.2              | Depression                                                          | 37.88                 | 1.61E-01       | 1.01 (1, 1.02)             |

| PheWAS code | Phenotype description                                                  | Prevalence (%) | p-value  | Odds Ratio (95% CI) |
|-------------|------------------------------------------------------------------------|----------------|----------|---------------------|
| 586         | Other disorders of the kidney and ureters                              | 5              | 1.62E-01 | 1.02 (0.99, 1.04)   |
| 433.6       | Acute, but ill-defined cerebrovascular disease                         | 3.49           | 1.62E-01 | 1.02 (0.99, 1.05)   |
| 792.1       | Papanicolaou smear of cervix or vagina with atypical squamous cells    | 0.3            | 1.63E-01 | 1.07 (0.97, 1.19)   |
| 295.3       | Psychosis                                                              | 2.75           | 1.63E-01 | 1.03 (0.99, 1.06)   |
| 727.4       | Ganglion and cyst of synovium, tendon, and bursa                       | 1.44           | 1.63E-01 | 1.03 (0.99, 1.08)   |
| 949         | Allergies, other                                                       | 2.32           | 1.64E-01 | 1.03 (0.99, 1.06)   |
| 242         | Thyrotoxicosis with or without goiter                                  | 1.24           | 1.64E-01 | 0.97 (0.92, 1.01)   |
| 364         | Corneal opacity and other disorders of cornea                          | 1.82           | 1.64E-01 | 1.03 (0.99, 1.07)   |
| 345.1       | Epilepsy                                                               | 0.8            | 1.65E-01 | 1.04 (0.98, 1.11)   |
| 599.8       | Other symptoms involving urinary system                                | 1.51           | 1.65E-01 | 1.03 (0.99, 1.08)   |
| 356         | Hereditary and idiopathic peripheral neuropathy                        | 7.26           | 1.65E-01 | 1.01 (0.99, 1.04)   |
| 362.6       | Peripheral retinal degenerations                                       | 1.27           | 1.65E-01 | 1.03 (0.99, 1.08)   |
| 172.22      | Squamous cell carcinoma                                                | 1.27           | 1.67E-01 | 1.03 (0.99, 1.08)   |
| 288.1       | Decreased white blood cell count                                       | 1.25           | 1.67E-01 | 0.97 (0.92, 1.01)   |
| 136         | Other infectious and parasitic diseases                                | 0.53           | 1.68E-01 | 1.05 (0.98, 1.13)   |
| 575         | Other biliary tract disease                                            | 1.1            | 1.68E-01 | 1.04 (0.99, 1.09)   |
| 145.2       | Cancer of tongue                                                       | 0.27           | 1.70E-01 | 1.07 (0.97, 1.18)   |
| 172.3       | Carcinoma in situ of skin                                              | 0.75           | 1.70E-01 | 1.04 (0.98, 1.1)    |
| 681.5       | Cellulitis and abscess of leg, except foot                             | 2.36           | 1.71E-01 | 1.02 (0.99, 1.06)   |
| 588.1       | Renal osteodystrophy                                                   | 0.15           | 1.72E-01 | 1.1 (0.96, 1.27)    |
| 457.2       | Encounter for long-term (current) use of antiplatelets/antithrombotics | 0.49           | 1.72E-01 | 0.95 (0.88, 1.02)   |
| 474         | Acute and chronic tonsillitis                                          | 0.54           | 1.73E-01 | 1.05 (0.98, 1.13)   |
| 528.6       | Leukoplakia of oral mucosa                                             | 0.19           | 1.75E-01 | 1.08 (0.96, 1.22)   |
| 594.2       | Calculus of lower urinary tract                                        | 0.43           | 1.76E-01 | 1.06 (0.98, 1.14)   |
| 331.1       | Hydrocephalus                                                          | 0.14           | 1.76E-01 | 0.91 (0.79, 1.04)   |
| 458.2       | Iatrogenic hypotension                                                 | 0.14           | 1.76E-01 | 0.91 (0.79, 1.04)   |
| 288         | Diseases of white blood cells                                          | 2.42           | 1.77E-01 | 1.02 (0.99, 1.06)   |

| PheWAS code | Phenotype description                                                                 | Prevalence (%) | p-value  | Odds Ratio (95% CI) |
|-------------|---------------------------------------------------------------------------------------|----------------|----------|---------------------|
| 994.1       | Systemic inflammatory response syndrome (SIRS)                                        | 0.14           | 1.77E-01 | 0.91 (0.79, 1.04)   |
| 715.1       | Sacroiliitis NEC                                                                      | 0.68           | 1.79E-01 | 1.04 (0.98, 1.11)   |
| 41.2        | Streptococcus infection                                                               | 0.37           | 1.80E-01 | 0.94 (0.86, 1.03)   |
| 286.8       | Hypercoagulable state                                                                 | 0.38           | 1.80E-01 | 1.06 (0.97, 1.15)   |
| 340.1       | Migraine with aura                                                                    | 0.47           | 1.80E-01 | 1.05 (0.98, 1.14)   |
| 296.22      | Major depressive disorder                                                             | 17.36          | 1.81E-01 | 1.01 (1, 1.03)      |
| 194         | Cancer of other endocrine glands                                                      | 0.13           | 1.81E-01 | 0.9 (0.78, 1.05)    |
| 250.25      | Diabetes type 2 with peripheral circulatory disorders                                 | 0.85           | 1.82E-01 | 0.96 (0.91, 1.02)   |
| 355         | Complex regional/central pain syndrome                                                | 0.34           | 1.82E-01 | 1.06 (0.97, 1.16)   |
| 743         | Osteoporosis, osteopenia and pathological fracture                                    | 6.41           | 1.83E-01 | 1.01 (0.99, 1.04)   |
| 721.2       | Spondylosis with myelopathy                                                           | 1.14           | 1.83E-01 | 1.03 (0.98, 1.09)   |
| 512.1       | Wheezing                                                                              | 0.61           | 1.85E-01 | 1.05 (0.98, 1.12)   |
| 379.1       | Scleritis and episcleritis                                                            | 0.24           | 1.87E-01 | 1.08 (0.96, 1.21)   |
| 327.41      | Organic or persistent insomnia                                                        | 0.53           | 1.87E-01 | 0.95 (0.89, 1.02)   |
| 740.11      | Osteoarthritis, localized, primary                                                    | 2.34           | 1.87E-01 | 1.02 (0.99, 1.06)   |
| 911         | Blister                                                                               | 0.32           | 1.88E-01 | 1.06 (0.97, 1.17)   |
| 191.11      | Cancer of brain                                                                       | 0.14           | 1.91E-01 | 0.91 (0.79, 1.05)   |
| 290.13      | Senile dementia                                                                       | 0.18           | 1.92E-01 | 1.08 (0.96, 1.22)   |
| 585.4       | Chronic kidney disease, Stage I or II                                                 | 1.18           | 1.92E-01 | 0.97 (0.92, 1.02)   |
| 458.1       | Orthostatic hypotension                                                               | 1.74           | 1.92E-01 | 1.03 (0.99, 1.07)   |
| 728         | Disorders of muscle, ligament, and fascia                                             | 0.32           | 1.93E-01 | 0.94 (0.86, 1.03)   |
| 722.6       | Degeneration of intervertebral disc                                                   | 10.44          | 1.94E-01 | 1.01 (0.99, 1.03)   |
| 989         | Toxic effect of other substances, chiefly nonmedicinal as to source                   | 0.17           | 1.95E-01 | 1.08 (0.96, 1.23)   |
| 794         | Abnormal results of other function studies (bladder, pancreas, placenta, spleen, etc) | 0.11           | 1.95E-01 | 1.11 (0.95, 1.29)   |
| 556.1       | Ulceration of intestine                                                               | 0.18           | 1.96E-01 | 1.08 (0.96, 1.23)   |
| 535.6       | Duodenitis                                                                            | 0.31           | 1.96E-01 | 0.94 (0.86, 1.03)   |
| 738         | Other acquired musculoskeletal deformity                                              | 0.69           | 1.96E-01 | 1.04 (0.98, 1.11)   |
| 440.9       | Atherosclerosis of aorta                                                              | 0.23           | 1.98E-01 | 0.93 (0.84, 1.04)   |

| PheWAS code | Phenotype description                                    | Prevalence (%) | p-value  | Odds Ratio (95% CI) |
|-------------|----------------------------------------------------------|----------------|----------|---------------------|
| 747.11      | Cardiac shunt/ heart septal defect                       | 0.19           | 1.99E-01 | 1.08 (0.96, 1.21)   |
| 427.6       | Premature beats                                          | 1.09           | 1.99E-01 | 1.03 (0.98, 1.09)   |
| 771         | Musculoskeletal symptoms referable to limbs              | 0.22           | 2.00E-01 | 1.07 (0.96, 1.2)    |
| 389.3       | Degenerative and vascular disorders of ear               | 0.36           | 2.00E-01 | 1.06 (0.97, 1.15)   |
| 386.1       | Meniere's disease                                        | 0.35           | 2.01E-01 | 0.95 (0.87, 1.03)   |
| 426.31      | Right bundle branch block                                | 0.84           | 2.01E-01 | 0.96 (0.91, 1.02)   |
| 495.11      | Chronic obstructive asthma with exacerbation             | 0.26           | 2.02E-01 | 0.93 (0.84, 1.04)   |
| 285.21      | Anemia in chronic kidney disease                         | 1.05           | 2.02E-01 | 1.04 (0.98, 1.09)   |
| 370.3       | Keratoconjunctivitis                                     | 0.37           | 2.04E-01 | 0.95 (0.87, 1.03)   |
| 782.6       | Pallor and flushing                                      | 0.11           | 2.05E-01 | 0.91 (0.78, 1.06)   |
| 259.3       | Delay in sexual development and puberty NEC              | 0.31           | 2.06E-01 | 1.06 (0.97, 1.16)   |
| 333.4       | Torsion dystonia                                         | 0.4            | 2.07E-01 | 0.95 (0.87, 1.03)   |
| 979         | Adverse drug events and drug allergies                   | 1.21           | 2.09E-01 | 1.03 (0.98, 1.08)   |
| 1009        | Injury, NOS                                              | 5.13           | 2.11E-01 | 1.02 (0.99, 1.04)   |
| 580.2       | Nephrotic syndrome without mention of glomerulonephritis | 0.24           | 2.13E-01 | 0.93 (0.83, 1.04)   |
| 41.9        | Infection with drug-resistant microorganisms             | 0.27           | 2.13E-01 | 0.94 (0.85, 1.04)   |
| 532         | Dysphagia                                                | 7.87           | 2.14E-01 | 0.99 (0.97, 1.01)   |
| 475         | Chronic sinusitis                                        | 7.39           | 2.14E-01 | 1.01 (0.99, 1.03)   |
| 681.3       | Cellulitis and abscess of arm/hand                       | 1.01           | 2.15E-01 | 0.97 (0.92, 1.02)   |
| 172.21      | Basal cell carcinoma                                     | 2.49           | 2.17E-01 | 0.98 (0.95, 1.01)   |
| 263         | Other nutritional deficiency                             | 0.13           | 2.17E-01 | 0.9 (0.76, 1.06)    |
| 300         | Anxiety, phobic and dissociative disorders               | 36.54          | 2.18E-01 | 1.01 (1, 1.02)      |
| 550         | Abdominal hernia                                         | 12.07          | 2.20E-01 | 1.01 (0.99, 1.03)   |
| 735.1       | Flat foot                                                | 3.7            | 2.20E-01 | 1.02 (0.99, 1.05)   |
| 536         | Disorders of function of stomach                         | 2.68           | 2.20E-01 | 1.02 (0.99, 1.05)   |
| 331         | Other cerebral degenerations                             | 0.24           | 2.21E-01 | 0.94 (0.84, 1.04)   |
| 575.7       | Other disorders of gallbladder                           | 0.49           | 2.22E-01 | 1.05 (0.97, 1.12)   |
| 151         | Cancer of stomach                                        | 0.18           | 2.23E-01 | 1.08 (0.95, 1.22)   |
| 721.1       | Spondylosis without myelopathy                           | 8.7            | 2.24E-01 | 1.01 (0.99, 1.03)   |

| PheWAS code | Phenotype description                                          | Prevalence (%) | p-value  | Odds Ratio (95% CI) |
|-------------|----------------------------------------------------------------|----------------|----------|---------------------|
| 723         | Other disorders of cervical region                             | 0.47           | 2.24E-01 | 0.95 (0.88, 1.03)   |
| 627.4       | Premenopausal menorrhagia                                      | 0.1            | 2.25E-01 | 1.11 (0.94, 1.31)   |
| 531.4       | Peptic ulcer, site unspecified                                 | 2.03           | 2.26E-01 | 0.98 (0.94, 1.01)   |
| 735         | Acquired foot deformities                                      | 12.83          | 2.26E-01 | 1.01 (0.99, 1.03)   |
| 697         | Sarcoidosis                                                    | 0.47           | 2.26E-01 | 0.95 (0.87, 1.03)   |
| 1006        | Crushing injury                                                | 0.14           | 2.27E-01 | 0.92 (0.8, 1.05)    |
| 536.8       | Dyspepsia and other specified disorders of function of stomach | 2.09           | 2.30E-01 | 1.02 (0.99, 1.06)   |
| 305.2       | Eating disorder                                                | 0.24           | 2.30E-01 | 0.94 (0.84, 1.04)   |
| 796         | Elevated prostate specific antigen [PSA]                       | 10.59          | 2.31E-01 | 1.01 (0.99, 1.03)   |
| 250.12      | Type 1 diabetes with renal manifestations                      | 0.15           | 2.31E-01 | 0.92 (0.8, 1.06)    |
| 246         | Other disorders of thyroid                                     | 0.67           | 2.32E-01 | 0.96 (0.9, 1.03)    |
| 742         | Derangement of joint, non-traumatic                            | 1.22           | 2.33E-01 | 1.03 (0.98, 1.08)   |
| 344         | Other paralytic syndromes                                      | 1.03           | 2.33E-01 | 0.97 (0.92, 1.02)   |
| 840         | Sprains and strains                                            | 8.66           | 2.33E-01 | 1.01 (0.99, 1.03)   |
| 514         | Abnormal findings examination of lungs                         | 3.61           | 2.33E-01 | 1.02 (0.99, 1.05)   |
| 601.1       | Prostatitis                                                    | 2.32           | 2.33E-01 | 1.02 (0.99, 1.06)   |
| 187.2       | Malignant neoplasm of testis                                   | 0.21           | 2.34E-01 | 0.93 (0.84, 1.04)   |
| 773         | Pain in limb                                                   | 15.33          | 2.36E-01 | 1.01 (0.99, 1.03)   |
| 272.9       | Unspecified disorder of lipid metabolism                       | 0.39           | 2.37E-01 | 1.05 (0.97, 1.14)   |
| 369.5       | Conjunctivitis, infectious                                     | 1.8            | 2.37E-01 | 1.02 (0.98, 1.07)   |
| 722.1       | Displacement of intervertebral disc                            | 3.05           | 2.41E-01 | 1.02 (0.99, 1.05)   |
| 530.2       | Esophageal bleeding (varices/hemorrhage)                       | 0.64           | 2.41E-01 | 1.04 (0.97, 1.11)   |
| 348.9       | Other conditions of brain, NOS                                 | 0.38           | 2.41E-01 | 0.95 (0.87, 1.03)   |
| 627.3       | Postmenopausal atrophic vaginitis                              | 0.37           | 2.43E-01 | 0.95 (0.87, 1.04)   |
| 347         | Cataplexy and narcolepsy                                       | 0.21           | 2.44E-01 | 1.07 (0.95, 1.2)    |
| 416         | Cardiomegaly                                                   | 1.41           | 2.44E-01 | 0.97 (0.93, 1.02)   |
| 380.1       | Otitis externa                                                 | 2.29           | 2.47E-01 | 1.02 (0.99, 1.06)   |
| 509         | Respiratory failure, insufficiency, arrest                     | 2.64           | 2.47E-01 | 1.02 (0.99, 1.05)   |
| 185         | Cancer of prostate                                             | 8.46           | 2.48E-01 | 1.01 (0.99, 1.03)   |
| 870.3       | Other open wound of head and face                              | 0.21           | 2.48E-01 | 1.07 (0.96, 1.2)    |

| PheWAS code | Phenotype description                                  | Prevalence (%) | p-value  | Odds Ratio (95% CI) |
|-------------|--------------------------------------------------------|----------------|----------|---------------------|
| 596         | Other disorders of bladder                             | 4.16           | 2.48E-01 | 1.02 (0.99, 1.04)   |
| 740.9       | Osteoarthritis NOS                                     | 32.17          | 2.48E-01 | 0.99 (0.98, 1)      |
| 174.11      | Malignant neoplasm of female breast                    | 0.45           | 2.48E-01 | 0.95 (0.88, 1.03)   |
| 218         | Benign neoplasm of uterus                              | 0.7            | 2.49E-01 | 1.05 (0.97, 1.13)   |
| 913         | Toxic effect of venom                                  | 0.11           | 2.50E-01 | 1.09 (0.94, 1.27)   |
| 427.11      | Paroxysmal supraventricular tachycardia                | 0.67           | 2.51E-01 | 1.04 (0.97, 1.1)    |
| 370.31      | Keratoconjunctivitis sicca                             | 0.19           | 2.51E-01 | 0.93 (0.82, 1.05)   |
| 362.26      | Macular puckering of retina                            | 2.18           | 2.52E-01 | 0.98 (0.95, 1.01)   |
| 526.41      | Temporomandibular joint disorder, unspecified          | 0.87           | 2.56E-01 | 1.03 (0.98, 1.09)   |
| 727.5       | Rupture of synovium                                    | 0.34           | 2.57E-01 | 0.95 (0.87, 1.04)   |
| 724.9       | Other unspecified back disorders                       | 0.84           | 2.58E-01 | 0.97 (0.91, 1.03)   |
| 528.1       | Stomatitis and mucositis                               | 0.31           | 2.58E-01 | 1.05 (0.96, 1.16)   |
| 755.1       | Congenital deformities of feet                         | 1.01           | 2.58E-01 | 1.03 (0.98, 1.09)   |
| 433.1       | Occlusion and stenosis of precerebral arteries         | 3.86           | 2.58E-01 | 0.98 (0.96, 1.01)   |
| 214         | Lipoma                                                 | 2.89           | 2.60E-01 | 0.98 (0.95, 1.01)   |
| 496         | Chronic airway obstruction                             | 16.31          | 2.61E-01 | 0.99 (0.98, 1.01)   |
| 381         | Otitis media and Eustachian tube disorders             | 4.16           | 2.62E-01 | 1.02 (0.99, 1.04)   |
| 571.51      | Cirrhosis of liver without mention of alcohol          | 2.05           | 2.62E-01 | 1.02 (0.98, 1.06)   |
| 722.9       | Other and unspecified disc disorder                    | 0.63           | 2.63E-01 | 1.04 (0.97, 1.11)   |
| 835         | Internal derangement of knee                           | 4.5            | 2.64E-01 | 1.01 (0.99, 1.04)   |
| 427.41      | Ventricular fibrillation and flutter                   | 0.14           | 2.66E-01 | 0.92 (0.8, 1.06)    |
| 443.7       | Peripheral angiopathy in diseases classified elsewhere | 0.11           | 2.66E-01 | 0.91 (0.78, 1.07)   |
| 275         | Disorders of mineral metabolism                        | 3.61           | 2.66E-01 | 1.02 (0.99, 1.05)   |
| 70.9        | Hepatitis NOS                                          | 0.67           | 2.66E-01 | 0.96 (0.9, 1.03)    |
| 429.9       | Cardiac complications, not elsewhere classified        | 0.13           | 2.67E-01 | 0.92 (0.8, 1.07)    |
| 785         | Abdominal pain                                         | 15.36          | 2.69E-01 | 1.01 (0.99, 1.02)   |
| 594.8       | Renal colic                                            | 0.18           | 2.69E-01 | 1.07 (0.95, 1.21)   |
| 842         | Other sprains and strains                              | 0.96           | 2.69E-01 | 0.97 (0.92, 1.02)   |



| <b>PheWAS code</b> | <b>Phenotype description</b>                               | <b>Prevalence (%)</b> | <b>p-value</b> | <b>Odds Ratio (95% CI)</b> |
|--------------------|------------------------------------------------------------|-----------------------|----------------|----------------------------|
| 218.1              | Uterine leiomyoma                                          | 0.68                  | 2.71E-01       | 1.04 (0.97, 1.13)          |
| 530.9              | Heartburn                                                  | 0.64                  | 2.71E-01       | 1.04 (0.97, 1.11)          |
| 527                | Diseases of the salivary glands                            | 0.79                  | 2.71E-01       | 0.97 (0.91, 1.03)          |
| 208                | Benign neoplasm of colon                                   | 20.31                 | 2.72E-01       | 1.01 (0.99, 1.02)          |
| 706.3              | Seborrhea                                                  | 0.24                  | 2.74E-01       | 1.06 (0.96, 1.17)          |
| 531.1              | Hemorrhage from gastrointestinal ulcer                     | 0.22                  | 2.75E-01       | 1.06 (0.95, 1.19)          |
| 513.8              | Disorders of diaphragm                                     | 0.24                  | 2.76E-01       | 0.94 (0.84, 1.05)          |
| 41.8               | H. pylori                                                  | 0.72                  | 2.76E-01       | 1.04 (0.97, 1.11)          |
| 427.4              | Cardiac arrest and ventricular fibrillation                | 0.29                  | 2.76E-01       | 0.95 (0.86, 1.04)          |
| 317.11             | Alcoholic liver damage                                     | 1.23                  | 2.76E-01       | 0.97 (0.93, 1.02)          |
| 270.3              | Disorders of plasma protein metabolism                     | 0.87                  | 2.77E-01       | 1.03 (0.97, 1.09)          |
| 70.2               | Viral hepatitis B                                          | 0.71                  | 2.77E-01       | 1.04 (0.97, 1.11)          |
| 353.1              | Nerve plexus lesions                                       | 0.2                   | 2.77E-01       | 0.94 (0.83, 1.05)          |
| 253.1              | Pituitary hyperfunction                                    | 0.18                  | 2.78E-01       | 0.93 (0.82, 1.06)          |
| 624.9              | stress incontinence, female                                | 0.51                  | 2.78E-01       | 1.04 (0.97, 1.13)          |
| 1004               | Other signs and symptoms involving emotional state         | 0.38                  | 2.79E-01       | 1.05 (0.96, 1.14)          |
| 601                | Inflammatory diseases of prostate                          | 4.19                  | 2.79E-01       | 1.01 (0.99, 1.04)          |
| 228.1              | Hemangioma of skin and subcutaneous tissue                 | 0.24                  | 2.80E-01       | 1.06 (0.96, 1.17)          |
| 687                | Symptoms affecting skin                                    | 1.63                  | 2.81E-01       | 1.02 (0.98, 1.07)          |
| 447.1              | Stricture of artery                                        | 0.15                  | 2.81E-01       | 0.93 (0.82, 1.06)          |
| 535.8              | Other specified gastritis                                  | 0.53                  | 2.81E-01       | 1.04 (0.97, 1.12)          |
| 969                | Poisoning by psychotropic agents                           | 0.41                  | 2.81E-01       | 0.95 (0.88, 1.04)          |
| 300.4              | Dysthymic disorder                                         | 6.96                  | 2.82E-01       | 1.01 (0.99, 1.03)          |
| 378.1              | Strabismus (not specified as paralytic)                    | 1.51                  | 2.82E-01       | 0.98 (0.94, 1.02)          |
| 802                | Fracture of pelvis                                         | 0.18                  | 2.82E-01       | 1.07 (0.95, 1.2)           |
| 701.4              | Keloid scar                                                | 0.56                  | 2.83E-01       | 0.96 (0.88, 1.04)          |
| 281.1              | Megaloblastic anemia                                       | 0.9                   | 2.84E-01       | 0.97 (0.92, 1.03)          |
| 580.14             | Chronic glomerulonephritis, NOS                            | 0.13                  | 2.86E-01       | 0.92 (0.79, 1.07)          |
| 276.12             | Hyposmolality and/or hyponatremia                          | 1.99                  | 2.87E-01       | 0.98 (0.94, 1.02)          |
| 362.22             | Macular degeneration, wet                                  | 0.82                  | 2.89E-01       | 1.03 (0.97, 1.09)          |
| 225                | Benign neoplasm of brain and other parts of nervous system | 0.48                  | 2.90E-01       | 1.04 (0.97, 1.12)          |
| 555.2              | Ulcerative colitis                                         | 0.77                  | 2.91E-01       | 0.97 (0.91, 1.03)          |

| PheWAS code | Phenotype description                                                               | Prevalence (%) | p-value  | Odds Ratio (95% CI) |
|-------------|-------------------------------------------------------------------------------------|----------------|----------|---------------------|
| 379.4       | Anomalies of pupillary function                                                     | 0.27           | 2.91E-01 | 1.06 (0.96, 1.17)   |
| 337         | Disorders of the autonomic nervous system                                           | 0.58           | 2.92E-01 | 1.04 (0.97, 1.11)   |
| 292.12      | Symbolic dysfunction                                                                | 0.12           | 2.94E-01 | 1.09 (0.93, 1.27)   |
| 707.2       | Chronic ulcer of leg or foot                                                        | 3.1            | 2.95E-01 | 1.02 (0.99, 1.05)   |
| 510         | Other diseases of lung                                                              | 4.02           | 2.95E-01 | 1.01 (0.99, 1.04)   |
| 352.2       | Facial nerve disorders [CN7]                                                        | 0.74           | 2.96E-01 | 1.03 (0.97, 1.1)    |
| 174.1       | Breast cancer [female]                                                              | 0.45           | 2.97E-01 | 0.96 (0.88, 1.04)   |
| 290.12      | Dementia with cerebral degenerations                                                | 0.13           | 2.97E-01 | 0.93 (0.81, 1.07)   |
| 304         | Adjustment reaction                                                                 | 12.07          | 2.98E-01 | 1.01 (0.99, 1.03)   |
| 711         | Arthropathy associated with infections                                              | 0.49           | 2.99E-01 | 0.96 (0.89, 1.04)   |
| 526.4       | Temporomandibular joint disorders                                                   | 0.99           | 3.01E-01 | 1.03 (0.98, 1.08)   |
| 293.1       | Swelling, mass, or lump in head and neck [Space-occupying lesion, intracranial NOS] | 1.52           | 3.01E-01 | 0.98 (0.94, 1.02)   |
| 364.41      | Keratoconus                                                                         | 0.13           | 3.02E-01 | 1.08 (0.93, 1.26)   |
| 110.1       | Dermatophytosis                                                                     | 18.93          | 3.02E-01 | 1.01 (0.99, 1.02)   |
| 38.1        | Gram negative septicemia                                                            | 0.13           | 3.02E-01 | 1.08 (0.94, 1.24)   |
| 443.1       | Raynaud's syndrome                                                                  | 0.32           | 3.03E-01 | 1.05 (0.96, 1.15)   |
| 523.3       | Periodontitis (acute or chronic)                                                    | 8.19           | 3.03E-01 | 1.01 (0.99, 1.03)   |
| 873         | Broken tooth                                                                        | 0.52           | 3.04E-01 | 1.04 (0.97, 1.12)   |
| 817         | Concussion                                                                          | 0.63           | 3.05E-01 | 0.97 (0.9, 1.03)    |
| 285.22      | Anemia in neoplastic disease                                                        | 0.17           | 3.05E-01 | 1.07 (0.94, 1.21)   |
| 741.3       | Difficulty in walking                                                               | 2.45           | 3.06E-01 | 0.98 (0.95, 1.02)   |
| 291.8       | Alteration of consciousness                                                         | 0.47           | 3.07E-01 | 1.04 (0.96, 1.12)   |
| 797         | Shock                                                                               | 0.1            | 3.07E-01 | 0.92 (0.78, 1.08)   |
| 38.2        | Gram positive septicemia                                                            | 0.11           | 3.07E-01 | 1.09 (0.93, 1.27)   |
| 962.1       | Adrenal cortical steroids causing adverse effects in therapeutic use                | 0.12           | 3.09E-01 | 1.08 (0.93, 1.26)   |
| 691         | Congenital anomalies of skin                                                        | 0.5            | 3.10E-01 | 0.96 (0.89, 1.04)   |
| 695.7       | Prurigo and Lichen                                                                  | 1.49           | 3.10E-01 | 1.02 (0.98, 1.07)   |
| 706         | Diseases of sebaceous glands                                                        | 10.39          | 3.11E-01 | 1.01 (0.99, 1.03)   |
| 550.6       | Incisional hernia                                                                   | 0.87           | 3.13E-01 | 1.03 (0.97, 1.09)   |
| 721.8       | Other allied disorders of spine                                                     | 0.15           | 3.13E-01 | 1.07 (0.94, 1.23)   |

| PheWAS code | Phenotype description                                      | Prevalence (%) | p-value  | Odds Ratio (95% CI) |
|-------------|------------------------------------------------------------|----------------|----------|---------------------|
| 724.2       | Disorders of coccyx                                        | 0.15           | 3.13E-01 | 1.07 (0.94, 1.22)   |
| 521.1       | Dental caries                                              | 17.29          | 3.13E-01 | 1.01 (0.99, 1.02)   |
| 444.1       | Arterial embolism and thrombosis of lower extremity artery | 0.33           | 3.13E-01 | 0.95 (0.87, 1.05)   |
| 686.3       | Pilonidal cyst                                             | 0.24           | 3.13E-01 | 1.06 (0.95, 1.18)   |
| 578.2       | Blood in stool                                             | 4.7            | 3.13E-01 | 0.99 (0.96, 1.01)   |
| 274.2       | Crystal arthropathies                                      | 0.34           | 3.14E-01 | 1.05 (0.96, 1.14)   |
| 228         | Hemangioma and lymphangioma, any site                      | 0.79           | 3.14E-01 | 1.03 (0.97, 1.09)   |
| 686.1       | Carbuncle and furuncle                                     | 0.81           | 3.14E-01 | 1.03 (0.97, 1.1)    |
| 257         | Testicular dysfunction                                     | 4.39           | 3.17E-01 | 1.01 (0.99, 1.04)   |
| 704.2       | Hirsutism                                                  | 0.11           | 3.18E-01 | 0.91 (0.77, 1.09)   |
| 564.9       | Personal history of diseases of digestive system           | 0.19           | 3.18E-01 | 0.94 (0.84, 1.06)   |
| 728.7       | Fasciitis                                                  | 6.8            | 3.18E-01 | 0.99 (0.97, 1.01)   |
| 257.1       | Testicular hypofunction                                    | 4.23           | 3.19E-01 | 1.01 (0.99, 1.04)   |
| 281.11      | Pernicious anemia                                          | 0.22           | 3.19E-01 | 0.95 (0.85, 1.05)   |
| 618.1       | Prolapse of vaginal walls                                  | 0.22           | 3.19E-01 | 1.06 (0.95, 1.18)   |
| 200.1       | Polycythemia vera                                          | 0.36           | 3.20E-01 | 1.04 (0.96, 1.14)   |
| 362.3       | Other nondiabetic retinopathy                              | 2.37           | 3.21E-01 | 0.98 (0.95, 1.02)   |
| 338.1       | Acute pain                                                 | 0.63           | 3.23E-01 | 1.03 (0.97, 1.1)    |
| 303.3       | Psychogenic disorder                                       | 0.17           | 3.25E-01 | 0.94 (0.82, 1.07)   |
| 377.1       | Optic atrophy                                              | 0.86           | 3.26E-01 | 0.97 (0.92, 1.03)   |
| 580.32      | Nephritis and nephropathy with pathological lesion         | 0.36           | 3.27E-01 | 1.04 (0.96, 1.14)   |
| 352         | Disorders of other cranial nerves                          | 1.21           | 3.27E-01 | 1.02 (0.98, 1.07)   |
| 766         | Neuralgia, neuritis, and radiculitis NOS                   | 2.31           | 3.27E-01 | 1.02 (0.98, 1.05)   |
| 916         | Contusion                                                  | 3.84           | 3.28E-01 | 0.99 (0.96, 1.01)   |
| 345.11      | Generalized convulsive epilepsy                            | 0.18           | 3.28E-01 | 1.06 (0.94, 1.2)    |
| 531         | Peptic ulcer (excl. esophageal)                            | 3.15           | 3.29E-01 | 0.99 (0.96, 1.02)   |
| 333.1       | Essential tremor                                           | 1.6            | 3.29E-01 | 1.02 (0.98, 1.06)   |
| 714.1       | Rheumatoid arthritis                                       | 1.94           | 3.29E-01 | 0.98 (0.95, 1.02)   |
| 275.6       | Hypercalcemia                                              | 0.88           | 3.31E-01 | 1.03 (0.97, 1.09)   |
| 202.21      | Nodular lymphoma                                           | 0.13           | 3.32E-01 | 0.93 (0.81, 1.07)   |
| 579         | Other symptoms involving abdomen and pelvis                | 1.02           | 3.32E-01 | 1.03 (0.97, 1.08)   |
| 300.1       | Anxiety disorder                                           | 20.49          | 3.32E-01 | 1.01 (0.99, 1.02)   |
| 446.9       | Arteritis NOS                                              | 0.15           | 3.32E-01 | 1.07 (0.94, 1.21)   |
| 255.2       | Adrenal hypofunction                                       | 0.23           | 3.34E-01 | 0.95 (0.85, 1.06)   |

| PheWAS code | Phenotype description                                  | Prevalence (%) | p-value  | Odds Ratio (95% CI) |
|-------------|--------------------------------------------------------|----------------|----------|---------------------|
| 381.11      | Suppurative and unspecified otitis media               | 2.11           | 3.35E-01 | 1.02 (0.98, 1.06)   |
| 246.2       | Thyroid cyst                                           | 0.1            | 3.36E-01 | 0.92 (0.78, 1.09)   |
| 38.3        | Bacteremia                                             | 0.91           | 3.36E-01 | 1.03 (0.97, 1.09)   |
| 54          | Herpes simplex                                         | 1.87           | 3.37E-01 | 1.02 (0.98, 1.06)   |
| 792         | Abnormal Papanicolaou smear of cervix and cervical HPV | 0.88           | 3.37E-01 | 1.03 (0.97, 1.1)    |
| 367.8       | Hypermetropia                                          | 10.21          | 3.37E-01 | 0.99 (0.97, 1.01)   |
| 526.5       | Inflammatory conditions of jaw                         | 0.12           | 3.38E-01 | 1.08 (0.93, 1.25)   |
| 276.1       | Electrolyte imbalance                                  | 8.49           | 3.38E-01 | 1.01 (0.99, 1.03)   |
| 362.7       | Hereditary retinal dystrophies                         | 0.22           | 3.39E-01 | 1.05 (0.95, 1.18)   |
| 260         | Protein-calorie malnutrition                           | 1.35           | 3.39E-01 | 0.98 (0.93, 1.02)   |
| 599         | Other symptoms/disorders or the urinary system         | 14.19          | 3.42E-01 | 1.01 (0.99, 1.02)   |
| 791         | Gangrene                                               | 0.36           | 3.42E-01 | 0.96 (0.87, 1.05)   |
| 433.8       | Late effects of cerebrovascular disease                | 2.24           | 3.42E-01 | 0.98 (0.95, 1.02)   |
| 526         | Diseases of the jaws                                   | 1.73           | 3.43E-01 | 1.02 (0.98, 1.06)   |
| 524.3       | Anomalies of tooth position/malocclusion               | 0.88           | 3.43E-01 | 0.97 (0.92, 1.03)   |
| 458.9       | Hypotension NOS                                        | 2.94           | 3.44E-01 | 0.98 (0.95, 1.02)   |
| 586.2       | Cyst of kidney, acquired                               | 1.14           | 3.46E-01 | 1.02 (0.97, 1.08)   |
| 362.21      | Macular degeneration, dry                              | 3.39           | 3.47E-01 | 0.99 (0.96, 1.02)   |
| 385         | Other disorders of middle ear and mastoid              | 0.28           | 3.48E-01 | 1.05 (0.95, 1.15)   |
| 577.1       | Acute pancreatitis                                     | 1.38           | 3.48E-01 | 1.02 (0.98, 1.07)   |
| 253.2       | Pituitary hypofunction                                 | 0.15           | 3.49E-01 | 0.94 (0.82, 1.07)   |
| 292.3       | Memory loss                                            | 3.06           | 3.50E-01 | 0.99 (0.96, 1.02)   |
| 513.31      | Apnea                                                  | 0.25           | 3.50E-01 | 0.95 (0.86, 1.06)   |
| 599.1       | Urinary obstruction                                    | 0.55           | 3.52E-01 | 0.97 (0.9, 1.04)    |
| 316         | Substance addiction and disorders                      | 12.7           | 3.53E-01 | 1.01 (0.99, 1.03)   |
| 427.61      | Supraventricular premature beats                       | 0.21           | 3.54E-01 | 1.05 (0.94, 1.18)   |
| 318         | Tobacco use disorder                                   | 30.47          | 3.55E-01 | 0.99 (0.98, 1.01)   |
| 295         | Schizophrenia and other psychotic disorders            | 4.81           | 3.56E-01 | 1.01 (0.99, 1.04)   |
| 420         | Carditis                                               | 1.19           | 3.57E-01 | 1.02 (0.97, 1.07)   |
| 853         | Complication of colostomy or enterostomy               | 0.12           | 3.58E-01 | 1.07 (0.92, 1.25)   |
| 800         | Fracture of lower limb                                 | 2.12           | 3.59E-01 | 1.02 (0.98, 1.05)   |
| 512         | Other symptoms of                                      | 27.77          | 3.59E-01 | 1.01 (0.99, 1.02)   |

| <b>PheWAS code</b> | <b>Phenotype description</b>                           | <b>Prevalence (%)</b> | <b>p-value</b> | <b>Odds Ratio (95% CI)</b> |
|--------------------|--------------------------------------------------------|-----------------------|----------------|----------------------------|
|                    | respiratory system                                     |                       |                |                            |
| 244.2              | Acquired hypothyroidism                                | 0.23                  | 3.59E-01       | 0.95 (0.85, 1.06)          |
| 716                | Other arthropathies                                    | 9.38                  | 3.62E-01       | 1.01 (0.99, 1.03)          |
| 696.41             | Psoriasis vulgaris                                     | 2.61                  | 3.62E-01       | 0.99 (0.95, 1.02)          |
| 379.3              | Aphakia and other disorders of lens                    | 1.84                  | 3.62E-01       | 0.98 (0.95, 1.02)          |
| 386.9              | Dizziness and giddiness (Light-headedness and vertigo) | 10.22                 | 3.63E-01       | 1.01 (0.99, 1.03)          |
| 451                | Phlebitis and thrombophlebitis                         | 0.79                  | 3.64E-01       | 0.97 (0.92, 1.03)          |
| 360                | Disorders of the globe                                 | 0.25                  | 3.64E-01       | 0.95 (0.86, 1.06)          |
| 514.2              | Solitary pulmonary nodule                              | 1.33                  | 3.65E-01       | 1.02 (0.98, 1.07)          |
| 199                | Neoplasm of uncertain behavior                         | 2.42                  | 3.66E-01       | 1.02 (0.98, 1.05)          |
| 414.2              | ASCVD                                                  | 0.89                  | 3.66E-01       | 0.98 (0.92, 1.03)          |
| 593.2              | Microscopic hematuria                                  | 2.75                  | 3.67E-01       | 0.99 (0.95, 1.02)          |
| 574.2              | Calculus of bile duct                                  | 0.36                  | 3.68E-01       | 1.04 (0.96, 1.13)          |
| 592                | Cystitis and urethritis                                | 0.84                  | 3.69E-01       | 1.03 (0.97, 1.09)          |
| 211                | Benign neoplasm of other parts of digestive system     | 0.46                  | 3.69E-01       | 1.04 (0.96, 1.12)          |
| 803.21             | Colles' fracture                                       | 0.14                  | 3.70E-01       | 0.94 (0.82, 1.08)          |
| 415.2              | Chronic pulmonary heart disease                        | 1.4                   | 3.71E-01       | 0.98 (0.94, 1.02)          |
| 696                | Psoriasis and related disorders                        | 2.82                  | 3.71E-01       | 0.99 (0.96, 1.02)          |
| 707.1              | Decubitus ulcer                                        | 1.1                   | 3.73E-01       | 0.98 (0.93, 1.03)          |
| 427.12             | Paroxysmal ventricular tachycardia                     | 1.05                  | 3.74E-01       | 0.98 (0.93, 1.03)          |
| 395.3              | Nonrheumatic tricuspid valve disorders                 | 0.14                  | 3.76E-01       | 1.06 (0.93, 1.22)          |
| 747.1              | Cardiac congenital anomalies                           | 0.46                  | 3.76E-01       | 0.97 (0.9, 1.04)           |
| 446.5              | Giant cell arteritis                                   | 0.13                  | 3.76E-01       | 0.94 (0.81, 1.08)          |
| 379                | Other disorders of eye                                 | 9.64                  | 3.77E-01       | 0.99 (0.97, 1.01)          |
| 282.5              | Sickle cell anemia                                     | 0.18                  | 3.78E-01       | 1.08 (0.91, 1.27)          |
| 707.3              | Chronic ulcer of unspecified site                      | 1.12                  | 3.78E-01       | 1.02 (0.97, 1.07)          |
| 613.5              | Mastodynia                                             | 0.28                  | 3.78E-01       | 1.05 (0.95, 1.16)          |
| 288.2              | Elevated white blood cell count                        | 1.18                  | 3.78E-01       | 1.02 (0.97, 1.07)          |
| 728.71             | Contracture of palmar fascia [Dupuytren's disease]     | 0.99                  | 3.79E-01       | 0.98 (0.93, 1.03)          |
| 681.7              | Cellulitis and abscess of trunk                        | 1.1                   | 3.80E-01       | 1.02 (0.97, 1.08)          |
| 577                | Diseases of pancreas                                   | 2.08                  | 3.80E-01       | 1.02 (0.98, 1.06)          |
| 599.5              | Frequency of urination                                 | 5.57                  | 3.81E-01       | 1.01 (0.99, 1.03)          |

| PheWAS code | Phenotype description                                                                         | Prevalence (%) | p-value  | Odds Ratio (95% CI) |
|-------------|-----------------------------------------------------------------------------------------------|----------------|----------|---------------------|
|             | and polyuria                                                                                  |                |          |                     |
| 465.2       | Acute pharyngitis                                                                             | 2.84           | 3.81E-01 | 1.01 (0.98, 1.05)   |
| 751.2       | Congenital anomalies of urinary system                                                        | 1.31           | 3.82E-01 | 1.02 (0.97, 1.07)   |
| 357         | Inflammatory and toxic neuropathy                                                             | 0.38           | 3.82E-01 | 1.04 (0.96, 1.13)   |
| 601.11      | Acute prostatitis                                                                             | 0.3            | 3.84E-01 | 1.04 (0.95, 1.15)   |
| 379.2       | Disorders of vitreous body                                                                    | 6.12           | 3.85E-01 | 0.99 (0.97, 1.01)   |
| 225.1       | Benign neoplasm of brain, cranial nerves, meninges                                            | 0.46           | 3.86E-01 | 1.03 (0.96, 1.11)   |
| 727.2       | Bursitis disorders                                                                            | 1.47           | 3.86E-01 | 1.02 (0.98, 1.06)   |
| 1000        | Burns                                                                                         | 0.91           | 3.87E-01 | 0.98 (0.92, 1.03)   |
| 459.9       | Circulatory disease NEC                                                                       | 2.38           | 3.88E-01 | 0.98 (0.95, 1.02)   |
| 819         | Skull and face fracture and other intercranial injury                                         | 2.71           | 3.89E-01 | 1.01 (0.98, 1.05)   |
| 367.2       | Astigmatism                                                                                   | 15.71          | 3.89E-01 | 0.99 (0.98, 1.01)   |
| 585.34      | Chronic Kidney Disease, Stage IV                                                              | 1.52           | 3.89E-01 | 1.02 (0.98, 1.07)   |
| 560.1       | Paralytic ileus                                                                               | 0.27           | 3.89E-01 | 1.04 (0.95, 1.15)   |
| 213         | Benign neoplasm of bone and articular cartilage                                               | 0.14           | 3.90E-01 | 1.06 (0.93, 1.22)   |
| 709         | Diffuse diseases of connective tissue                                                         | 0.39           | 3.91E-01 | 0.96 (0.88, 1.05)   |
| 260.1       | Cachexia                                                                                      | 0.11           | 3.91E-01 | 0.93 (0.79, 1.1)    |
| 370         | Keratitis                                                                                     | 1.2            | 3.92E-01 | 1.02 (0.97, 1.07)   |
| 506         | Empyema and pneumothorax                                                                      | 0.49           | 3.92E-01 | 0.97 (0.9, 1.04)    |
| 369.2       | Eye infection, viral                                                                          | 0.48           | 3.92E-01 | 1.03 (0.96, 1.11)   |
| 362.31      | Separation of retinal layers                                                                  | 0.24           | 3.92E-01 | 1.05 (0.94, 1.16)   |
| 798.1       | Chronic fatigue syndrome                                                                      | 0.31           | 3.94E-01 | 0.96 (0.88, 1.05)   |
| 384.4       | Perforation of tympanic membrane                                                              | 0.5            | 3.95E-01 | 1.03 (0.96, 1.11)   |
| 801.1       | Fracture of foot                                                                              | 1.48           | 3.95E-01 | 1.02 (0.98, 1.06)   |
| 793         | Nonspecific abnormal findings on radiological and other examination of musculoskeletal system | 0.32           | 3.95E-01 | 0.96 (0.87, 1.05)   |
| 360.2       | Progressive myopia                                                                            | 0.11           | 3.95E-01 | 0.93 (0.79, 1.1)    |
| 994.2       | Sepsis                                                                                        | 1              | 3.95E-01 | 1.02 (0.97, 1.08)   |
| 930         | Allergic reaction to food                                                                     | 0.17           | 3.96E-01 | 0.94 (0.83, 1.08)   |
| 751.1       | Congenital anomalies of genital organs                                                        | 0.27           | 3.97E-01 | 0.96 (0.87, 1.06)   |
| 733.9       | Chondromalacia                                                                                | 0.24           | 3.97E-01 | 1.05 (0.94, 1.17)   |
| 716.9       | Arthropathy NOS                                                                               | 8.73           | 3.97E-01 | 1.01 (0.99, 1.03)   |

| <b>PheWAS code</b> | <b>Phenotype description</b>                                                | <b>Prevalence (%)</b> | <b>p-value</b> | <b>Odds Ratio (95% CI)</b> |
|--------------------|-----------------------------------------------------------------------------|-----------------------|----------------|----------------------------|
| 871.1              | Open wound of hand except finger(s)                                         | 0.28                  | 3.98E-01       | 0.96 (0.87, 1.06)          |
| 312                | Conduct disorders                                                           | 1.25                  | 3.98E-01       | 1.02 (0.97, 1.07)          |
| 695.2              | Bullous dermatoses                                                          | 0.14                  | 3.99E-01       | 1.06 (0.92, 1.22)          |
| 250.13             | Type 1 diabetes with ophthalmic manifestations                              | 0.4                   | 3.99E-01       | 0.96 (0.89, 1.05)          |
| 334.2              | Anterior horn cell disease                                                  | 0.15                  | 3.99E-01       | 1.06 (0.93, 1.21)          |
| 241.1              | Nontoxic uninodular goiter                                                  | 1.9                   | 3.99E-01       | 1.02 (0.98, 1.06)          |
| 580.1              | Glomerulonephritis                                                          | 0.32                  | 4.00E-01       | 0.96 (0.87, 1.06)          |
| 567                | Peritonitis and retroperitoneal infections                                  | 0.33                  | 4.01E-01       | 1.04 (0.95, 1.14)          |
| 297                | Suicidal ideation or attempt                                                | 3.73                  | 4.01E-01       | 1.01 (0.98, 1.04)          |
| 597                | Other disorders of urethra and urinary tract                                | 0.94                  | 4.03E-01       | 0.98 (0.93, 1.03)          |
| 537                | Other disorders of stomach and duodenum                                     | 0.9                   | 4.03E-01       | 1.02 (0.97, 1.08)          |
| 714                | Rheumatoid arthritis and other inflammatory polyarthropathies               | 2.12                  | 4.04E-01       | 0.98 (0.95, 1.02)          |
| 509.3              | Pulmonary insufficiency or respiratory failure following trauma and surgery | 0.25                  | 4.05E-01       | 1.04 (0.94, 1.16)          |
| 429                | Ill-defined descriptions and complications of heart disease                 | 1.81                  | 4.06E-01       | 0.98 (0.95, 1.02)          |
| 508                | Pulmonary collapse; interstitial and compensatory emphysema                 | 0.6                   | 4.08E-01       | 1.03 (0.96, 1.1)           |
| 317.1              | Alcoholism                                                                  | 13.11                 | 4.08E-01       | 0.99 (0.98, 1.01)          |
| 261.2              | Vitamin B-complex deficiencies                                              | 4.29                  | 4.08E-01       | 1.01 (0.99, 1.04)          |
| 110                | Dermatophytosis / Dermatomycosis                                            | 19.6                  | 4.09E-01       | 1.01 (0.99, 1.02)          |
| 696.4              | Psoriasis                                                                   | 2.72                  | 4.09E-01       | 0.99 (0.96, 1.02)          |
| 320                | Meningitis                                                                  | 0.16                  | 4.09E-01       | 1.06 (0.93, 1.21)          |
| 427.9              | Palpitations                                                                | 3.07                  | 4.10E-01       | 1.01 (0.98, 1.04)          |
| 374.3              | Ptosis of eyelid                                                            | 1.83                  | 4.13E-01       | 1.02 (0.98, 1.06)          |
| 585.1              | Acute renal failure                                                         | 5.21                  | 4.14E-01       | 0.99 (0.96, 1.01)          |
| 724.1              | Disorders of sacrum                                                         | 0.64                  | 4.15E-01       | 1.03 (0.96, 1.1)           |
| 250.14             | Type 1 diabetes with neurological manifestations                            | 0.43                  | 4.15E-01       | 0.97 (0.89, 1.05)          |
| 379.9              | Pain, swelling or discharge of eye                                          | 0.78                  | 4.17E-01       | 1.03 (0.96, 1.09)          |

| <b>PheWAS code</b> | <b>Phenotype description</b>                                       | <b>Prevalence (%)</b> | <b>p-value</b> | <b>Odds Ratio (95% CI)</b> |
|--------------------|--------------------------------------------------------------------|-----------------------|----------------|----------------------------|
| 210                | Benign neoplasm of lip, oral cavity, and pharynx                   | 0.42                  | 4.19E-01       | 0.97 (0.89, 1.05)          |
| 204.12             | Lymphoid leukemia, chronic                                         | 0.43                  | 4.20E-01       | 1.03 (0.96, 1.11)          |
| 345                | Epilepsy, recurrent seizures, convulsions                          | 3.48                  | 4.22E-01       | 0.99 (0.96, 1.02)          |
| 358                | Myoneural disorders                                                | 0.2                   | 4.22E-01       | 1.05 (0.94, 1.17)          |
| 594.3              | Calculus of ureter                                                 | 1.28                  | 4.24E-01       | 1.02 (0.97, 1.07)          |
| 259                | Other endocrine disorders                                          | 0.23                  | 4.24E-01       | 0.96 (0.86, 1.07)          |
| 286.1              | Congenital coagulation defects                                     | 0.11                  | 4.24E-01       | 1.06 (0.91, 1.24)          |
| 353                | Nerve root and plexus disorders                                    | 1.29                  | 4.25E-01       | 0.98 (0.94, 1.03)          |
| 735.21             | Hammer toe (acquired)                                              | 3.26                  | 4.25E-01       | 0.99 (0.96, 1.02)          |
| 741                | Symptoms and disorders of the joints                               | 6.16                  | 4.26E-01       | 0.99 (0.97, 1.01)          |
| 627.22             | Need for Hormone replacement therapy (postmenopausal)              | 0.32                  | 4.26E-01       | 1.04 (0.94, 1.14)          |
| 313.2              | Tics and stuttering                                                | 0.19                  | 4.27E-01       | 1.05 (0.93, 1.18)          |
| 288.11             | Neutropenia                                                        | 0.81                  | 4.28E-01       | 0.98 (0.92, 1.04)          |
| 801                | Fracture of ankle and foot                                         | 2.86                  | 4.29E-01       | 1.01 (0.98, 1.05)          |
| 426.24             | Atrioventricular block, complete                                   | 1.04                  | 4.30E-01       | 0.98 (0.93, 1.03)          |
| 850                | Hemorrhage or hematoma complicating a procedure                    | 0.8                   | 4.32E-01       | 1.02 (0.97, 1.09)          |
| 800.1              | Fracture of neck of femur                                          | 0.59                  | 4.32E-01       | 0.97 (0.91, 1.04)          |
| 701.1              | Keratoderma, acquired                                              | 3.15                  | 4.32E-01       | 0.99 (0.96, 1.02)          |
| 240                | Simple and unspecified goiter                                      | 0.53                  | 4.32E-01       | 0.97 (0.9, 1.05)           |
| 415                | Pulmonary heart disease                                            | 3.06                  | 4.33E-01       | 0.99 (0.96, 1.02)          |
| 362.29             | Macular degeneration (senile) of retina NOS                        | 1.87                  | 4.33E-01       | 1.02 (0.98, 1.05)          |
| 859                | Complication due to other implant and internal device              | 0.33                  | 4.34E-01       | 1.04 (0.95, 1.14)          |
| 907                | Injuries to the nervous system                                     | 0.94                  | 4.34E-01       | 1.02 (0.97, 1.08)          |
| 334                | Degenerative disease of the spinal cord                            | 0.58                  | 4.35E-01       | 0.97 (0.91, 1.04)          |
| 963.1              | Antineoplastic and immunosuppressive drugs causing adverse effects | 0.26                  | 4.37E-01       | 1.04 (0.94, 1.15)          |
| 704                | Diseases of hair and hair follicles                                | 2.91                  | 4.38E-01       | 1.01 (0.98, 1.05)          |
| 289.5              | Diseases of spleen                                                 | 0.26                  | 4.39E-01       | 1.04 (0.94, 1.15)          |



| PheWAS code | Phenotype description                                                         | Prevalence (%) | p-value  | Odds Ratio (95% CI) |
|-------------|-------------------------------------------------------------------------------|----------------|----------|---------------------|
| 226         | Benign neoplasm of thyroid glands                                             | 0.1            | 4.39E-01 | 0.94 (0.79, 1.11)   |
| 681.1       | Cellulitis and abscess of fingers/toes                                        | 1.97           | 4.39E-01 | 1.02 (0.98, 1.05)   |
| 757         | Congenital anomalies of the integument                                        | 0.11           | 4.39E-01 | 1.06 (0.91, 1.25)   |
| 433.5       | Cerebral aneurysm                                                             | 0.24           | 4.40E-01 | 0.96 (0.86, 1.07)   |
| 333         | Extrapyramidal disease and abnormal movement disorders                        | 3.31           | 4.40E-01 | 0.99 (0.96, 1.02)   |
| 509.2       | Respiratory insufficiency                                                     | 0.35           | 4.40E-01 | 0.97 (0.88, 1.06)   |
| 385.3       | Cholesteatoma                                                                 | 0.23           | 4.41E-01 | 1.04 (0.94, 1.16)   |
| 591         | Urinary tract infection                                                       | 7.85           | 4.42E-01 | 1.01 (0.99, 1.03)   |
| 585.3       | Chronic renal failure [CKD]                                                   | 10.16          | 4.44E-01 | 0.99 (0.97, 1.01)   |
| 477         | Epistaxis or throat hemorrhage                                                | 1.54           | 4.44E-01 | 0.98 (0.94, 1.03)   |
| 740.2       | Osteoarthritis, generalized                                                   | 1.94           | 4.45E-01 | 0.99 (0.95, 1.02)   |
| 726.2       | Synoviopathy                                                                  | 0.65           | 4.45E-01 | 0.98 (0.91, 1.04)   |
| 433.12      | Cerebral atherosclerosis                                                      | 0.2            | 4.45E-01 | 1.05 (0.93, 1.18)   |
| 625.1       | Dyspareunia                                                                   | 0.16           | 4.46E-01 | 1.05 (0.92, 1.2)    |
| 427.22      | Atrial flutter                                                                | 2.16           | 4.46E-01 | 0.99 (0.95, 1.02)   |
| 614         | Inflammatory diseases of female pelvic organs                                 | 1.32           | 4.47E-01 | 1.02 (0.97, 1.08)   |
| 710.11      | Acute osteomyelitis                                                           | 0.48           | 4.49E-01 | 0.97 (0.9, 1.05)    |
| 367.9       | Blindness and low vision                                                      | 3.72           | 4.49E-01 | 0.99 (0.96, 1.02)   |
| 512.7       | Shortness of breath                                                           | 9.98           | 4.50E-01 | 1.01 (0.99, 1.03)   |
| 597.1       | Urethral stricture (not specified as infectious)                              | 0.84           | 4.51E-01 | 0.98 (0.92, 1.04)   |
| 191         | Malignant and unknown neoplasms of brain and nervous system                   | 0.25           | 4.51E-01 | 0.96 (0.87, 1.06)   |
| 871.4       | Open wound of toe(s)                                                          | 0.17           | 4.52E-01 | 1.05 (0.93, 1.19)   |
| 747         | Cardiac and circulatory congenital anomalies                                  | 0.58           | 4.53E-01 | 0.97 (0.91, 1.04)   |
| 705.1       | Dyshidrosis                                                                   | 0.33           | 4.53E-01 | 1.04 (0.94, 1.14)   |
| 605         | Erectile dysfunction [ED]                                                     | 23.27          | 4.54E-01 | 0.99 (0.98, 1.01)   |
| 41.12       | Methicillin resistant Staphylococcus aureus                                   | 0.53           | 4.54E-01 | 1.03 (0.96, 1.1)    |
| 531.3       | Duodenal ulcer                                                                | 0.4            | 4.56E-01 | 0.97 (0.89, 1.05)   |
| 433.31      | Transient cerebral ischemia                                                   | 4.27           | 4.57E-01 | 1.01 (0.98, 1.04)   |
| 740.3       | Osteoarthritis involving more than one site, but not specified as generalized | 1.07           | 4.57E-01 | 1.02 (0.97, 1.07)   |

| PheWAS code | Phenotype description                                           | Prevalence (%) | p-value  | Odds Ratio (95% CI) |
|-------------|-----------------------------------------------------------------|----------------|----------|---------------------|
| 378         | Strabismus and other disorders of binocular eye movements       | 2.24           | 4.58E-01 | 0.99 (0.95, 1.02)   |
| 389.1       | Sensorineural hearing loss                                      | 29.11          | 4.59E-01 | 1 (0.98, 1.01)      |
| 384         | Other disorders of tympanic membrane                            | 0.57           | 4.59E-01 | 1.03 (0.96, 1.1)    |
| 313         | Pervasive developmental disorders                               | 1.77           | 4.60E-01 | 1.01 (0.98, 1.06)   |
| 173         | Neoplasm of uncertain behavior of skin                          | 6.14           | 4.60E-01 | 1.01 (0.99, 1.03)   |
| 854         | Complications of cardiac/vascular device, implant, and graft    | 0.64           | 4.61E-01 | 1.03 (0.96, 1.1)    |
| 8.52        | Intestinal infection due to C. difficile                        | 0.56           | 4.62E-01 | 0.97 (0.91, 1.04)   |
| 289         | Other diseases of blood and blood-forming organs                | 0.69           | 4.63E-01 | 0.98 (0.92, 1.04)   |
| 710.19      | Unspecified osteomyelitis                                       | 1.12           | 4.66E-01 | 0.98 (0.93, 1.03)   |
| 990         | Effects radiation NOS                                           | 0.6            | 4.67E-01 | 1.03 (0.96, 1.1)    |
| 389.4       | Tinnitus                                                        | 11.1           | 4.68E-01 | 1.01 (0.99, 1.02)   |
| 379.5       | Disorders of iris and ciliary body                              | 0.74           | 4.69E-01 | 1.02 (0.96, 1.09)   |
| 429.3       | Symptoms involving cardiovascular system                        | 0.71           | 4.70E-01 | 1.02 (0.96, 1.09)   |
| 197         | Chemotherapy                                                    | 2.03           | 4.70E-01 | 1.01 (0.98, 1.05)   |
| 275.11      | Hereditary hemochromatosis                                      | 0.15           | 4.70E-01 | 1.05 (0.92, 1.19)   |
| 250.3       | Insulin pump user                                               | 3.21           | 4.71E-01 | 0.99 (0.96, 1.02)   |
| 395.2       | Nonrheumatic aortic valve disorders                             | 2.66           | 4.71E-01 | 0.99 (0.96, 1.02)   |
| 278.4       | Abnormal weight gain                                            | 0.47           | 4.72E-01 | 0.97 (0.9, 1.05)    |
| 270         | Disorders of protein plasma/amino-acid transport and metabolism | 1.41           | 4.74E-01 | 1.02 (0.97, 1.06)   |
| 275.51      | Hypocalcemia                                                    | 0.29           | 4.77E-01 | 0.97 (0.88, 1.06)   |
| 701.5       | Abnormal granulation tissue                                     | 0.11           | 4.77E-01 | 1.06 (0.9, 1.24)    |
| 149.1       | Cancer of oropharynx                                            | 0.29           | 4.80E-01 | 1.03 (0.94, 1.14)   |
| 595         | Hydronephrosis                                                  | 0.81           | 4.81E-01 | 1.02 (0.96, 1.08)   |
| 327.5       | Parasomnia                                                      | 1.46           | 4.82E-01 | 1.02 (0.97, 1.06)   |
| 365.5       | Pseudoexfoliation glaucoma                                      | 0.13           | 4.83E-01 | 1.05 (0.92, 1.2)    |
| 174         | Breast cancer                                                   | 0.48           | 4.85E-01 | 0.97 (0.9, 1.05)    |
| 250.21      | Type 2 diabetes with ketoacidosis                               | 0.27           | 4.85E-01 | 1.04 (0.93, 1.16)   |
| 195         | Cancer, suspected or other                                      | 1.39           | 4.85E-01 | 1.02 (0.97, 1.06)   |

| PheWAS code | Phenotype description                                                    | Prevalence (%) | p-value  | Odds Ratio (95% CI) |
|-------------|--------------------------------------------------------------------------|----------------|----------|---------------------|
| 480.3       | Pneumonia due to fungus (mycoses)                                        | 0.13           | 4.88E-01 | 1.05 (0.91, 1.22)   |
| 130.1       | Lyme disease                                                             | 0.14           | 4.88E-01 | 0.95 (0.83, 1.09)   |
| 112.3       | Candidiasis of skin and nails                                            | 0.11           | 4.89E-01 | 1.05 (0.91, 1.23)   |
| 736.6       | Unequal leg length (acquired)                                            | 0.93           | 4.89E-01 | 0.98 (0.93, 1.04)   |
| 348         | Other conditions of brain                                                | 0.37           | 4.89E-01 | 1.03 (0.95, 1.12)   |
| 286         | Coagulation defects                                                      | 2.1            | 4.89E-01 | 0.99 (0.95, 1.02)   |
| 368.4       | Visual field defects                                                     | 1.92           | 4.89E-01 | 0.99 (0.95, 1.03)   |
| 750.1       | Upper gastrointestinal congenital anomalies                              | 0.11           | 4.90E-01 | 1.06 (0.91, 1.23)   |
| 283         | Acquired hemolytic anemias                                               | 0.13           | 4.90E-01 | 0.95 (0.82, 1.1)    |
| 504.1       | Idiopathic fibrosing alveolitis                                          | 0.14           | 4.91E-01 | 1.05 (0.92, 1.2)    |
| 420.3       | Endocarditis                                                             | 0.63           | 4.92E-01 | 0.98 (0.92, 1.04)   |
| 496.1       | Emphysema                                                                | 1.54           | 4.92E-01 | 0.99 (0.94, 1.03)   |
| 271.9       | Other disorders of carbohydrate transport and metabolism                 | 0.11           | 4.93E-01 | 1.06 (0.9, 1.24)    |
| 770         | Myalgia and myositis unspecified                                         | 5.23           | 4.94E-01 | 1.01 (0.98, 1.03)   |
| 286.7       | Other and unspecified coagulation defects                                | 1.05           | 4.96E-01 | 0.98 (0.93, 1.03)   |
| 804         | Fracture of hand or wrist                                                | 1.76           | 4.96E-01 | 0.99 (0.95, 1.03)   |
| 874         | Complication of amputation stump                                         | 0.25           | 4.96E-01 | 0.96 (0.87, 1.07)   |
| 80          | Postoperative infection                                                  | 1.03           | 4.97E-01 | 1.02 (0.97, 1.07)   |
| 1011        | Complications of surgical and medical procedures                         | 0.74           | 4.97E-01 | 1.02 (0.96, 1.09)   |
| 317         | Alcohol-related disorders                                                | 18.46          | 4.97E-01 | 1.01 (0.99, 1.02)   |
| 613.8       | Other specified disorders of breast                                      | 0.12           | 4.97E-01 | 0.95 (0.81, 1.11)   |
| 145         | Cancer of mouth                                                          | 0.64           | 4.99E-01 | 1.02 (0.96, 1.09)   |
| 599.4       | Urinary incontinence                                                     | 4.51           | 4.99E-01 | 0.99 (0.97, 1.02)   |
| 81          | Infection/inflammation of internal prosthetic device; implant; and graft | 0.68           | 5.00E-01 | 1.02 (0.96, 1.09)   |
| 426.23      | Second degree AV block                                                   | 0.22           | 5.03E-01 | 1.04 (0.93, 1.16)   |
| 624         | Symptoms involving female genital tract                                  | 0.14           | 5.04E-01 | 0.95 (0.81, 1.11)   |
| 523.1       | Gingivitis                                                               | 3.68           | 5.06E-01 | 0.99 (0.96, 1.02)   |
| 443.8       | Other specified peripheral vascular diseases                             | 0.25           | 5.07E-01 | 1.04 (0.93, 1.15)   |
| 110.11      | Dermatophytosis of nail                                                  | 14.02          | 5.07E-01 | 1.01 (0.99, 1.02)   |
| 290.1       | Dementias                                                                | 1.62           | 5.08E-01 | 1.01 (0.97, 1.06)   |

| PheWAS code | Phenotype description                                      | Prevalence (%) | p-value  | Odds Ratio (95% CI) |
|-------------|------------------------------------------------------------|----------------|----------|---------------------|
| 274.21      | Chondrocalcinosis                                          | 0.31           | 5.09E-01 | 1.03 (0.94, 1.13)   |
| 601.8       | Other inflammatory disorders of male genital organs        | 0.15           | 5.09E-01 | 0.95 (0.83, 1.1)    |
| 386.2       | Peripheral or central vertigo                              | 1.38           | 5.11E-01 | 1.01 (0.97, 1.06)   |
| 612.2       | Hypertrophy of breast (Gynecomastia)                       | 1              | 5.11E-01 | 0.98 (0.93, 1.04)   |
| 270.32      | Paraproteinemia                                            | 0.65           | 5.13E-01 | 1.02 (0.96, 1.09)   |
| 401.3       | Other hypertensive complications                           | 0.46           | 5.13E-01 | 0.97 (0.9, 1.06)    |
| 530         | Diseases of esophagus                                      | 34.5           | 5.14E-01 | 1 (0.99, 1.02)      |
| 415.1       | Acute pulmonary heart disease                              | 1.69           | 5.14E-01 | 0.99 (0.95, 1.03)   |
| 348.8       | Encephalopathy, not elsewhere classified                   | 0.2            | 5.16E-01 | 1.04 (0.92, 1.17)   |
| 1012        | Late effect                                                | 0.21           | 5.21E-01 | 1.04 (0.93, 1.16)   |
| 964         | Poisoning by agents primarily affecting blood constituents | 0.22           | 5.21E-01 | 0.96 (0.86, 1.08)   |
| 204         | Leukemia                                                   | 1              | 5.22E-01 | 1.02 (0.97, 1.07)   |
| 611.3       | Lump or mass in breast                                     | 1.14           | 5.22E-01 | 1.02 (0.97, 1.07)   |
| 526.8       | Exostosis of jaw                                           | 0.14           | 5.23E-01 | 0.95 (0.82, 1.1)    |
| 381.1       | Otitis media                                               | 3              | 5.23E-01 | 1.01 (0.98, 1.04)   |
| 394.7       | Disease of tricuspid valve                                 | 0.3            | 5.24E-01 | 0.97 (0.88, 1.07)   |
| 433.3       | Cerebral ischemia                                          | 4.34           | 5.25E-01 | 1.01 (0.98, 1.03)   |
| 727.1       | Synovitis and tenosynovitis                                | 3.85           | 5.25E-01 | 0.99 (0.96, 1.02)   |
| 361.2       | Retinoschisis and retinal cysts                            | 0.25           | 5.25E-01 | 1.03 (0.93, 1.14)   |
| 292.4       | Altered mental status                                      | 1.26           | 5.28E-01 | 0.98 (0.94, 1.03)   |
| 270.38      | Other specified disorders of plasma protein metabolism     | 0.14           | 5.29E-01 | 1.05 (0.91, 1.21)   |
| 737.1       | Kyphosis (acquired)                                        | 0.17           | 5.29E-01 | 1.04 (0.92, 1.17)   |
| 528.3       | Cellulitis and abscess of oral soft tissues                | 0.25           | 5.30E-01 | 1.04 (0.93, 1.16)   |
| 277         | Other disorders of metabolism                              | 0.29           | 5.30E-01 | 0.97 (0.88, 1.07)   |
| 803.1       | Fracture of humerus                                        | 0.59           | 5.31E-01 | 0.98 (0.92, 1.05)   |
| 381.2       | Eustachian tube disorders                                  | 1.09           | 5.31E-01 | 1.02 (0.97, 1.07)   |
| 471         | Nasal polyps                                               | 0.71           | 5.33E-01 | 1.02 (0.96, 1.08)   |
| 593         | Hematuria                                                  | 6.71           | 5.33E-01 | 0.99 (0.97, 1.01)   |
| 415.11      | Pulmonary embolism and infarction, acute                   | 1.68           | 5.33E-01 | 0.99 (0.95, 1.03)   |
| 250.7       | Diabetic retinopathy                                       | 5.75           | 5.33E-01 | 1.01 (0.98, 1.03)   |
| 574.3       | Cholecystitis without cholelithiasis                       | 0.92           | 5.35E-01 | 1.02 (0.96, 1.07)   |

| PheWAS code | Phenotype description                                    | Prevalence (%) | p-value  | Odds Ratio (95% CI) |
|-------------|----------------------------------------------------------|----------------|----------|---------------------|
| 573.9       | Abnormal serum enzyme levels                             | 0.86           | 5.35E-01 | 0.98 (0.93, 1.04)   |
| 269         | Proteinuria                                              | 1.95           | 5.36E-01 | 1.01 (0.97, 1.05)   |
| 280.2       | Iron deficiency anemia secondary to blood loss (chronic) | 0.42           | 5.36E-01 | 1.03 (0.95, 1.11)   |
| 687.2       | Localized superficial swelling, mass, or lump            | 1.31           | 5.37E-01 | 1.01 (0.97, 1.06)   |
| 312.3       | Impulse control disorder                                 | 1.07           | 5.38E-01 | 1.02 (0.96, 1.07)   |
| 195.1       | Malignant neoplasm, other                                | 1.04           | 5.38E-01 | 1.02 (0.97, 1.07)   |
| 751.21      | Cystic kidney disease                                    | 1.23           | 5.38E-01 | 1.01 (0.97, 1.06)   |
| 282.9       | Other hereditary hemolytic anemias                       | 0.1            | 5.41E-01 | 1.06 (0.88, 1.29)   |
| 284.1       | Pancytopenia                                             | 0.55           | 5.42E-01 | 0.98 (0.91, 1.05)   |
| 170         | Cancer of bone and connective tissue                     | 0.24           | 5.42E-01 | 1.03 (0.93, 1.15)   |
| 536.3       | Gastroparesis                                            | 0.5            | 5.43E-01 | 0.98 (0.91, 1.05)   |
| 686         | Other local infections of skin and subcutaneous tissue   | 0.75           | 5.44E-01 | 1.02 (0.96, 1.08)   |
| 626.2       | Dysmenorrhea                                             | 0.43           | 5.45E-01 | 0.97 (0.89, 1.06)   |
| 375.2       | Epiphora                                                 | 0.29           | 5.46E-01 | 0.97 (0.88, 1.07)   |
| 519.2       | Respiratory complications                                | 0.1            | 5.47E-01 | 1.05 (0.89, 1.24)   |
| 157         | Pancreatic cancer                                        | 0.21           | 5.47E-01 | 0.97 (0.86, 1.08)   |
| 520.2       | Disturbances in tooth eruption                           | 0.1            | 5.48E-01 | 1.05 (0.89, 1.25)   |
| 353.2       | Nerve root lesions                                       | 0.85           | 5.50E-01 | 1.02 (0.96, 1.08)   |
| 711.1       | Pyogenic arthritis                                       | 0.29           | 5.50E-01 | 0.97 (0.88, 1.07)   |
| 476         | Allergic rhinitis                                        | 16.74          | 5.50E-01 | 1 (0.99, 1.02)      |
| 201         | Hodgkin's disease                                        | 0.14           | 5.52E-01 | 1.04 (0.91, 1.19)   |
| 433.21      | Cerebral artery occlusion, with cerebral infarction      | 2.2            | 5.52E-01 | 0.99 (0.95, 1.03)   |
| 788         | Syncope and collapse                                     | 5.26           | 5.55E-01 | 0.99 (0.97, 1.02)   |
| 550.2       | Diaphragmatic hernia                                     | 3.34           | 5.56E-01 | 1.01 (0.98, 1.04)   |
| 112         | Candidiasis                                              | 1.43           | 5.56E-01 | 1.01 (0.97, 1.06)   |
| 705         | Disorders of sweat glands                                | 0.69           | 5.57E-01 | 1.02 (0.96, 1.09)   |
| 573.5       | Jaundice (not of newborn)                                | 0.4            | 5.57E-01 | 0.98 (0.9, 1.06)    |
| 78          | Viral warts & HPV                                        | 3.67           | 5.58E-01 | 0.99 (0.96, 1.02)   |
| 686.2       | Impetigo                                                 | 0.11           | 5.58E-01 | 0.95 (0.82, 1.11)   |
| 195.3       |                                                          | 0.81           | 5.60E-01 | 1.02 (0.96, 1.08)   |
| 504         | Other alveolar and parietoalveolar pneumonopathy         | 0.48           | 5.65E-01 | 1.02 (0.95, 1.1)    |
| 428.3       | Heart failure with reduced EF [Systolic or               | 1.49           | 5.66E-01 | 0.99 (0.94, 1.03)   |

| PheWAS code | Phenotype description                                   | Prevalence (%) | p-value  | Odds Ratio (95% CI) |
|-------------|---------------------------------------------------------|----------------|----------|---------------------|
|             | combined heart failure]                                 |                |          |                     |
| 433.2       | Occlusion of cerebral arteries                          | 2.29           | 5.68E-01 | 0.99 (0.96, 1.03)   |
| 366.1       | Nonsenile Cataract                                      | 1.21           | 5.68E-01 | 1.01 (0.97, 1.06)   |
| 395.6       | Heart valve replaced                                    | 1.19           | 5.69E-01 | 1.01 (0.97, 1.06)   |
| 475.9       | Postnasal drip                                          | 0.14           | 5.69E-01 | 1.04 (0.91, 1.19)   |
| 202         | Cancer of other lymphoid, histiocytic tissue            | 0.97           | 5.70E-01 | 1.02 (0.96, 1.07)   |
| 994.21      | Septic shock                                            | 0.17           | 5.70E-01 | 1.04 (0.92, 1.17)   |
| 31          | Diseases due to other mycobacteria                      | 0.15           | 5.72E-01 | 0.96 (0.84, 1.1)    |
| 524         | Dentofacial anomalies, including malocclusion           | 1.34           | 5.72E-01 | 0.99 (0.94, 1.03)   |
| 272.12      | Hyperglyceridemia                                       | 3.73           | 5.73E-01 | 1.01 (0.98, 1.04)   |
| 275.3       | Disorders of magnesium metabolism                       | 1.03           | 5.74E-01 | 1.02 (0.96, 1.07)   |
| 870         | Open wounds of head; neck; and trunk                    | 2.14           | 5.74E-01 | 1.01 (0.97, 1.05)   |
| 523.31      | Acute periodontitis                                     | 6.85           | 5.74E-01 | 1.01 (0.98, 1.03)   |
| 41.1        | Staphylococcus infections                               | 1.39           | 5.74E-01 | 0.99 (0.94, 1.03)   |
| 365.2       | Primary angle-closure glaucoma                          | 1.11           | 5.76E-01 | 0.99 (0.94, 1.04)   |
| 276.6       | Fluid overload                                          | 0.52           | 5.76E-01 | 1.02 (0.95, 1.1)    |
| 272.11      | Hypercholesterolemia                                    | 14.46          | 5.79E-01 | 1 (0.98, 1.01)      |
| 313.1       | Attention deficit hyperactivity disorder                | 1.52           | 5.79E-01 | 1.01 (0.97, 1.06)   |
| 117.1       | Histoplasmosis                                          | 0.17           | 5.79E-01 | 0.97 (0.86, 1.09)   |
| 910         | Superficial injury, infected                            | 0.1            | 5.81E-01 | 0.95 (0.81, 1.13)   |
| 530.3       | Stricture and stenosis of esophagus                     | 0.75           | 5.84E-01 | 1.02 (0.96, 1.08)   |
| 358.1       | Myasthenia gravis                                       | 0.18           | 5.84E-01 | 1.03 (0.92, 1.17)   |
| 365.11      | Primary open angle glaucoma                             | 4.58           | 5.85E-01 | 0.99 (0.97, 1.02)   |
| 253.4       | Anterior pituitary disorders                            | 0.67           | 5.86E-01 | 0.98 (0.92, 1.05)   |
| 704.1       | Alopecia                                                | 0.53           | 5.86E-01 | 1.02 (0.95, 1.1)    |
| 337.1       | Peripheral autonomic neuropathy                         | 0.42           | 5.87E-01 | 1.02 (0.94, 1.11)   |
| 430.1       | Subarachnoid hemorrhage                                 | 0.1            | 5.87E-01 | 1.05 (0.89, 1.23)   |
| 212         | Benign neoplasm of respiratory and intrathoracic organs | 0.22           | 5.88E-01 | 1.03 (0.92, 1.15)   |
| 327.72      | Sleep related leg cramps                                | 0.17           | 5.89E-01 | 1.03 (0.92, 1.17)   |
| 251.1       | Hypoglycemia                                            | 1.03           | 5.91E-01 | 1.01 (0.96, 1.07)   |
| 790         | Nonspecific findings on examination of blood            | 0.28           | 5.91E-01 | 0.97 (0.88, 1.07)   |
| 287.31      | Primary                                                 | 0.18           | 5.92E-01 | 0.97 (0.86, 1.09)   |

| PheWAS code | Phenotype description                                             | Prevalence (%) | p-value  | Odds Ratio (95% CI) |
|-------------|-------------------------------------------------------------------|----------------|----------|---------------------|
|             | thrombocytopenia                                                  |                |          |                     |
| 755         | Congenital anomalies of limbs                                     | 1.12           | 5.92E-01 | 1.01 (0.96, 1.07)   |
| 701         | Other hypertrophic and atrophic conditions of skin                | 7.74           | 5.93E-01 | 0.99 (0.97, 1.01)   |
| 503         | Pulmonary congestion and hypostasis                               | 0.22           | 5.94E-01 | 1.03 (0.92, 1.15)   |
| 453         | Chronic venous hypertension                                       | 0.18           | 5.95E-01 | 1.03 (0.92, 1.17)   |
| 285.2       | Anemia of chronic disease                                         | 1.93           | 5.95E-01 | 0.99 (0.95, 1.03)   |
| 626.12      | Excessive or frequent menstruation                                | 0.73           | 5.96E-01 | 0.98 (0.91, 1.05)   |
| 70          | Viral hepatitis                                                   | 6.28           | 5.97E-01 | 1.01 (0.98, 1.03)   |
| 585.33      | Chronic Kidney Disease, Stage III                                 | 5.02           | 5.97E-01 | 1.01 (0.98, 1.03)   |
| 297.1       | Suicidal ideation                                                 | 2.99           | 5.98E-01 | 1.01 (0.98, 1.04)   |
| 740         | Osteoarthritis                                                    | 36.75          | 5.99E-01 | 1 (0.99, 1.01)      |
| 722.8       | Postlaminectomy syndrome                                          | 0.91           | 5.99E-01 | 0.99 (0.93, 1.04)   |
| 291.1       | Transient mental disorders due to conditions classified elsewhere | 0.21           | 6.00E-01 | 0.97 (0.87, 1.09)   |
| 375.1       | Dry eyes                                                          | 11.8           | 6.00E-01 | 1 (0.98, 1.01)      |
| 433         | Cerebrovascular disease                                           | 11.17          | 6.01E-01 | 1 (0.98, 1.01)      |
| 396         | Abnormal heart sounds                                             | 2.26           | 6.01E-01 | 1.01 (0.97, 1.05)   |
| 573.7       | Abnormal results of function study of liver                       | 5.38           | 6.01E-01 | 1.01 (0.98, 1.03)   |
| 800.4       | Fracture of patella                                               | 0.35           | 6.04E-01 | 1.02 (0.94, 1.12)   |
| 726.1       | Enthesopathy                                                      | 7.72           | 6.05E-01 | 1.01 (0.99, 1.03)   |
| 732         | Osteochondropathies                                               | 0.17           | 6.05E-01 | 0.97 (0.85, 1.1)    |
| 350         | Abnormal movement                                                 | 10.38          | 6.06E-01 | 1 (0.98, 1.01)      |
| 241         | Nontoxic nodular goiter                                           | 2.38           | 6.07E-01 | 1.01 (0.97, 1.04)   |
| 8.6         | Viral Enteritis                                                   | 0.2            | 6.07E-01 | 0.97 (0.86, 1.09)   |
| 560.4       | Other intestinal obstruction                                      | 0.94           | 6.08E-01 | 0.99 (0.93, 1.04)   |
| 200         | Myeloproliferative disease                                        | 0.97           | 6.08E-01 | 1.01 (0.96, 1.07)   |
| 425         | Cardiomyopathy                                                    | 3.28           | 6.09E-01 | 0.99 (0.96, 1.02)   |
| 579.8       | Nonspecific abnormal findings in stool contents                   | 1.35           | 6.13E-01 | 0.99 (0.94, 1.03)   |
| 741.4       | Joint effusions                                                   | 1.23           | 6.13E-01 | 0.99 (0.94, 1.04)   |
| 704.8       | Other specified diseases of hair and hair follicles               | 2.36           | 6.14E-01 | 1.01 (0.97, 1.05)   |
| 367.4       | Presbyopia                                                        | 34.97          | 6.15E-01 | 1 (0.98, 1.01)      |
| 604.1       | Redundant prepuce and phimosis/BXO                                | 0.71           | 6.16E-01 | 1.02 (0.95, 1.08)   |
| 187.8       | Neoplasm of uncertain behavior of male genital                    | 0.12           | 6.16E-01 | 1.04 (0.89, 1.21)   |

| PheWAS code | Phenotype description                                           | Prevalence (%) | p-value  | Odds Ratio (95% CI) |
|-------------|-----------------------------------------------------------------|----------------|----------|---------------------|
|             | organs                                                          |                |          |                     |
| 170.2       | Cancer of connective tissue                                     | 0.16           | 6.17E-01 | 1.03 (0.91, 1.17)   |
| 569.2       | Gastrointestinal complications                                  | 0.16           | 6.17E-01 | 1.03 (0.91, 1.18)   |
| 578         | Gastrointestinal hemorrhage                                     | 10.12          | 6.18E-01 | 1 (0.98, 1.01)      |
| 1019        | Other ill-defined and unknown causes of morbidity and mortality | 5.4            | 6.19E-01 | 0.99 (0.97, 1.02)   |
| 1014        | Effects of heat, cold and air pressure                          | 0.15           | 6.19E-01 | 0.97 (0.84, 1.11)   |
| 615         | Endometriosis                                                   | 0.23           | 6.19E-01 | 0.97 (0.86, 1.09)   |
| 535.2       | Atrophic gastritis                                              | 0.28           | 6.20E-01 | 0.98 (0.88, 1.08)   |
| 800.3       | Fracture of tibia and fibula                                    | 0.88           | 6.21E-01 | 0.99 (0.93, 1.04)   |
| 292.1       | Aphasia/speech disturbance                                      | 1.55           | 6.22E-01 | 0.99 (0.95, 1.03)   |
| 282.8       | Other hemoglobinopathies                                        | 0.23           | 6.22E-01 | 0.97 (0.86, 1.09)   |
| 418         | Nonspecific chest pain                                          | 23.6           | 6.23E-01 | 1 (0.99, 1.02)      |
| 527.2       | Sialoadenitis                                                   | 0.33           | 6.23E-01 | 0.98 (0.89, 1.07)   |
| 427.5       | Arrhythmia (cardiac) NOS                                        | 5.14           | 6.24E-01 | 0.99 (0.97, 1.02)   |
| 351         | Other peripheral nerve disorders                                | 16.32          | 6.24E-01 | 1 (0.99, 1.02)      |
| 365         | Glaucoma                                                        | 17.36          | 6.25E-01 | 1 (0.98, 1.01)      |
| 716.2       | Unspecified monoarthritis                                       | 0.26           | 6.25E-01 | 0.97 (0.88, 1.08)   |
| 798         | Malaise and fatigue                                             | 6.78           | 6.26E-01 | 1.01 (0.98, 1.03)   |
| 830         | Dislocation                                                     | 3.12           | 6.26E-01 | 0.99 (0.96, 1.02)   |
| 737.3       | Kyphoscoliosis and scoliosis                                    | 0.53           | 6.26E-01 | 0.98 (0.91, 1.06)   |
| 378.5       | Paralytic strabismus                                            | 0.35           | 6.31E-01 | 1.02 (0.94, 1.11)   |
| 717         | Polymyalgia Rheumatica                                          | 0.38           | 6.31E-01 | 0.98 (0.9, 1.06)    |
| 288.3       | Eosinophilia                                                    | 0.16           | 6.32E-01 | 1.03 (0.91, 1.18)   |
| 479         | Other upper respiratory disease                                 | 2.24           | 6.34E-01 | 0.99 (0.96, 1.03)   |
| 530.1       | Esophagitis, GERD and related diseases                          | 33.65          | 6.34E-01 | 1 (0.99, 1.01)      |
| 366.3       | Traumatic cataract                                              | 0.13           | 6.34E-01 | 1.04 (0.89, 1.2)    |
| 455         | Hemorrhoids                                                     | 11.12          | 6.35E-01 | 1 (0.98, 1.01)      |
| 610.1       | Cystic mastopathy                                               | 0.31           | 6.36E-01 | 1.02 (0.93, 1.13)   |
| 430.3       | Subdural hemorrhage                                             | 0.28           | 6.38E-01 | 0.98 (0.88, 1.08)   |
| 587         | Kidney replaced by transplant                                   | 0.32           | 6.39E-01 | 1.02 (0.93, 1.13)   |
| 727         | Other disorders of synovium, tendon, and bursa                  | 9.58           | 6.40E-01 | 1 (0.99, 1.02)      |
| 735.3       | Hallux valgus (Bunion)                                          | 3.14           | 6.40E-01 | 1.01 (0.98, 1.04)   |



| PheWAS code | Phenotype description                                 | Prevalence (%) | p-value  | Odds Ratio (95% CI) |
|-------------|-------------------------------------------------------|----------------|----------|---------------------|
| 204.1       | Lymphoid leukemia                                     | 0.46           | 6.41E-01 | 1.02 (0.95, 1.1)    |
| 155         | Cancer of liver and intrahepatic bile duct            | 0.45           | 6.42E-01 | 1.02 (0.94, 1.1)    |
| 529         | Diseases and other conditions of the tongue           | 0.27           | 6.43E-01 | 1.02 (0.93, 1.13)   |
| 342         | Hemiplegia                                            | 0.43           | 6.43E-01 | 0.98 (0.9, 1.07)    |
| 428.2       | Heart failure NOS                                     | 0.87           | 6.44E-01 | 0.99 (0.93, 1.04)   |
| 388         | Other disorders of ear                                | 0.55           | 6.46E-01 | 0.98 (0.92, 1.05)   |
| 427.7       | Tachycardia NOS                                       | 1.7            | 6.46E-01 | 0.99 (0.95, 1.03)   |
| 522.5       | Periapical abscess                                    | 0.94           | 6.48E-01 | 1.01 (0.96, 1.07)   |
| 281.9       | Deficiency anemias                                    | 0.59           | 6.49E-01 | 1.02 (0.95, 1.09)   |
| 596.5       | Functional disorders of bladder                       | 2.22           | 6.49E-01 | 1.01 (0.97, 1.04)   |
| 747.12      | Valvular heart disease/ heart chambers                | 0.12           | 6.50E-01 | 0.97 (0.84, 1.12)   |
| 962         | Poisoning by hormones and synthetic substitutes       | 0.2            | 6.51E-01 | 1.03 (0.91, 1.16)   |
| 715         | Other inflammatory spondylopathies                    | 1.06           | 6.52E-01 | 0.99 (0.94, 1.04)   |
| 204.2       | Myeloid leukemia                                      | 0.21           | 6.52E-01 | 1.03 (0.92, 1.15)   |
| 513         | Respiratory abnormalities                             | 2              | 6.52E-01 | 1.01 (0.97, 1.05)   |
| 977         | Personal history of allergy to medicinal agents       | 0.19           | 6.53E-01 | 1.03 (0.91, 1.16)   |
| 522.1       | Pulpitis and necrosis of tooth pulp                   | 2.15           | 6.56E-01 | 1.01 (0.97, 1.05)   |
| 613         | Other nonmalignant breast conditions                  | 0.77           | 6.58E-01 | 1.01 (0.95, 1.08)   |
| 743.21      | Pathologic fracture of vertebrae                      | 0.15           | 6.59E-01 | 1.03 (0.9, 1.17)    |
| 260.6       | Anorexia                                              | 0.28           | 6.59E-01 | 1.02 (0.92, 1.13)   |
| 530.11      | GERD                                                  | 32.23          | 6.61E-01 | 1 (0.99, 1.01)      |
| 349         | Other and unspecified disorders of the nervous system | 0.39           | 6.62E-01 | 0.98 (0.9, 1.07)    |
| 289.4       | Lymphadenitis                                         | 1.83           | 6.62E-01 | 0.99 (0.95, 1.03)   |
| 292.2       | Mild cognitive impairment                             | 1.06           | 6.65E-01 | 0.99 (0.94, 1.04)   |
| 531.2       | Gastric ulcer                                         | 0.58           | 6.67E-01 | 0.98 (0.92, 1.06)   |
| 565.1       | Anal and rectal polyp                                 | 0.6            | 6.67E-01 | 1.01 (0.95, 1.08)   |
| 401.2       | Hypertensive heart and/or renal disease               | 6.5            | 6.68E-01 | 1 (0.97, 1.02)      |
| 275.5       | Disorders of calcium/phosphorus metabolism            | 1.18           | 6.68E-01 | 1.01 (0.96, 1.06)   |
| 426.7       | Abnormal electrocardiogram [ECG] [EKG]                | 3.58           | 6.73E-01 | 1.01 (0.98, 1.04)   |
| 425.11      | Hypertrophic obstructive cardiomyopathy               | 0.14           | 6.74E-01 | 0.97 (0.84, 1.12)   |

| PheWAS code | Phenotype description                                                                    | Prevalence (%) | p-value  | Odds Ratio (95% CI) |
|-------------|------------------------------------------------------------------------------------------|----------------|----------|---------------------|
| 626.14      | Irregular menstrual bleeding                                                             | 0.15           | 6.75E-01 | 0.97 (0.84, 1.12)   |
| 427.8       | Sinoatrial node dysfunction (Bradycardia)                                                | 0.87           | 6.75E-01 | 0.99 (0.94, 1.04)   |
| 180.3       | Cervical intraepithelial neoplasia [CIN] [Cervical dysplasia]                            | 0.3            | 6.76E-01 | 0.98 (0.88, 1.08)   |
| 695.9       | Unspecified erythematous condition                                                       | 0.12           | 6.77E-01 | 1.03 (0.89, 1.2)    |
| 278.11      | Morbid obesity                                                                           | 8.87           | 6.77E-01 | 1 (0.99, 1.02)      |
| 706.2       | Sebaceous cyst                                                                           | 5.68           | 6.77E-01 | 1 (0.98, 1.03)      |
| 509.1       | Respiratory failure                                                                      | 1.41           | 6.78E-01 | 1.01 (0.97, 1.06)   |
| 202.2       | Non-Hodgkin lymphoma                                                                     | 0.92           | 6.79E-01 | 1.01 (0.96, 1.07)   |
| 733         | Other disorders of bone and cartilage                                                    | 0.58           | 6.81E-01 | 0.99 (0.92, 1.06)   |
| 426.3       | Bundle branch block                                                                      | 1.52           | 6.81E-01 | 0.99 (0.95, 1.03)   |
| 724         | Other and unspecified disorders of back                                                  | 2.16           | 6.82E-01 | 1.01 (0.97, 1.05)   |
| 560         | Intestinal obstruction without mention of hernia                                         | 1.33           | 6.82E-01 | 1.01 (0.96, 1.06)   |
| 155.1       | Malignant neoplasm of liver, primary                                                     | 0.39           | 6.82E-01 | 1.02 (0.94, 1.11)   |
| 871.3       | Open wound of foot except toe(s) alone                                                   | 0.35           | 6.83E-01 | 0.98 (0.9, 1.07)    |
| 223         | Benign neoplasm of kidney and other urinary organs                                       | 0.22           | 6.84E-01 | 1.02 (0.92, 1.14)   |
| 149         | Cancer of larynx, pharynx, nasal cavities                                                | 0.89           | 6.84E-01 | 1.01 (0.96, 1.07)   |
| 394         | Rheumatic disease of the heart valves                                                    | 1.08           | 6.85E-01 | 0.99 (0.94, 1.04)   |
| 198.3       | Secondary malignant neoplasm of digestive systems                                        | 0.11           | 6.85E-01 | 1.03 (0.88, 1.21)   |
| 245         | Thyroiditis                                                                              | 0.25           | 6.88E-01 | 0.98 (0.88, 1.08)   |
| 564.8       | Abnormal findings on exam of gastrointestinal tract/ abdominal area                      | 0.59           | 6.89E-01 | 1.01 (0.95, 1.09)   |
| 938.2       | Chronic dermatitis due to solar radiation                                                | 0.52           | 6.90E-01 | 1.01 (0.95, 1.09)   |
| 967         | Adverse effects of sedatives or other central nervous system depressants and anesthetics | 0.14           | 6.90E-01 | 1.03 (0.89, 1.19)   |
| 172.11      | Melanomas of skin                                                                        | 1.33           | 6.91E-01 | 0.99 (0.95, 1.04)   |
| 290.11      | Alzheimer's disease                                                                      | 0.42           | 6.91E-01 | 0.98 (0.91, 1.07)   |
| 333.2       | Myoclonus                                                                                | 0.2            | 6.96E-01 | 0.98 (0.87, 1.1)    |
| 300.9       | Posttraumatic stress disorder                                                            | 21.44          | 6.97E-01 | 1 (0.99, 1.02)      |

| PheWAS code | Phenotype description                                                              | Prevalence (%) | p-value  | Odds Ratio (95% CI) |
|-------------|------------------------------------------------------------------------------------|----------------|----------|---------------------|
| 442.8       | Aneurysm of other specified artery                                                 | 0.13           | 6.97E-01 | 1.03 (0.89, 1.19)   |
| 573.6       | Nonspecific elevation of levels of transaminase or lactic acid dehydrogenase [LDH] | 0.84           | 7.00E-01 | 1.01 (0.96, 1.07)   |
| 963         | Poisoning by primarily systemic agents                                             | 0.3            | 7.01E-01 | 1.02 (0.93, 1.12)   |
| 589         | Abnormal results of function study of kidney                                       | 0.22           | 7.01E-01 | 0.98 (0.87, 1.09)   |
| 474.2       | Chronic tonsillitis and adenoiditis                                                | 0.34           | 7.01E-01 | 1.02 (0.93, 1.12)   |
| 705.8       | Hyperhidrosis                                                                      | 0.45           | 7.01E-01 | 0.98 (0.91, 1.07)   |
| 426.2       | Atrioventricular [AV] block                                                        | 2.13           | 7.01E-01 | 0.99 (0.96, 1.03)   |
| 735.22      | Claw toe (acquired)                                                                | 0.13           | 7.02E-01 | 0.97 (0.84, 1.12)   |
| 724.8       | Other symptoms referable to back                                                   | 0.54           | 7.02E-01 | 1.01 (0.94, 1.09)   |
| 609         | Male infertility and abnormal spermatozoa                                          | 0.34           | 7.03E-01 | 1.02 (0.93, 1.11)   |
| 600         | Hyperplasia of prostate                                                            | 24.32          | 7.03E-01 | 1 (0.99, 1.02)      |
| 604.3       | Peyronie's disease                                                                 | 0.41           | 7.04E-01 | 1.02 (0.94, 1.1)    |
| 279.7       | Other immunological findings                                                       | 0.16           | 7.06E-01 | 0.97 (0.85, 1.12)   |
| 960.2       | Allergy/adverse effect of penicillin                                               | 0.15           | 7.09E-01 | 0.97 (0.85, 1.12)   |
| 706.1       | Acne                                                                               | 1.42           | 7.12E-01 | 1.01 (0.96, 1.06)   |
| 800.2       | Fracture of unspecified part of femur                                              | 0.25           | 7.12E-01 | 0.98 (0.88, 1.09)   |
| 368.2       | Diplopia and disorders of binocular vision                                         | 1.28           | 7.13E-01 | 1.01 (0.96, 1.06)   |
| 327.31      | Central/nonobstructive sleep apnea                                                 | 0.47           | 7.13E-01 | 1.01 (0.94, 1.09)   |
| 363         | Chorioretinal inflammations, scars, and other disorders of choroid                 | 1.42           | 7.14E-01 | 0.99 (0.95, 1.04)   |
| 590         | Pyelonephritis                                                                     | 0.39           | 7.15E-01 | 1.02 (0.93, 1.1)    |
| 426.32      | Left bundle branch block                                                           | 0.54           | 7.16E-01 | 1.01 (0.94, 1.09)   |
| 972         | Poisoning by agents primarily affecting the cardiovascular system                  | 0.25           | 7.17E-01 | 0.98 (0.88, 1.09)   |
| 465.4       | Acute laryngitis and tracheitis                                                    | 0.12           | 7.19E-01 | 1.03 (0.88, 1.2)    |
| 382         | Otalgia                                                                            | 1.37           | 7.19E-01 | 1.01 (0.96, 1.05)   |
| 464         | Acute sinusitis                                                                    | 3.96           | 7.19E-01 | 1.01 (0.98, 1.03)   |
| 520         | Disorders of tooth development                                                     | 0.61           | 7.21E-01 | 1.01 (0.95, 1.08)   |
| 379.51      | Pigmentary iris degeneration                                                       | 0.24           | 7.21E-01 | 1.02 (0.92, 1.13)   |
| 53.1        | Herpes zoster with nervous system                                                  | 0.44           | 7.21E-01 | 1.01 (0.94, 1.1)    |

| PheWAS code | Phenotype description                                           | Prevalence (%) | p-value  | Odds Ratio (95% CI) |
|-------------|-----------------------------------------------------------------|----------------|----------|---------------------|
|             | complications                                                   |                |          |                     |
| 1008        | Crushing or internal injury to organs                           | 0.22           | 7.23E-01 | 1.02 (0.91, 1.14)   |
| 565         | Anal and rectal conditions                                      | 2.84           | 7.24E-01 | 0.99 (0.96, 1.03)   |
| 818         | Intracranial hemorrhage (injury)                                | 0.15           | 7.25E-01 | 0.98 (0.85, 1.12)   |
| 361.1       | Retinal detachment with retinal defect                          | 0.78           | 7.25E-01 | 1.01 (0.95, 1.07)   |
| 365.1       | Open-angle glaucoma                                             | 11.26          | 7.26E-01 | 1 (0.98, 1.01)      |
| 241.2       | Nontoxic multinodular goiter                                    | 0.81           | 7.26E-01 | 0.99 (0.93, 1.05)   |
| 222         | Benign neoplasm of male genital organs                          | 0.3            | 7.27E-01 | 1.02 (0.93, 1.12)   |
| 550.1       | Inguinal hernia                                                 | 5.12           | 7.27E-01 | 1 (0.98, 1.03)      |
| 277.5       | Other disorders of lipid metabolism                             | 1.38           | 7.28E-01 | 1.01 (0.96, 1.05)   |
| 327.4       | Insomnia                                                        | 11.36          | 7.30E-01 | 1 (0.99, 1.02)      |
| 270.2       | Disorders of amino-acid metabolism                              | 0.5            | 7.32E-01 | 0.99 (0.92, 1.06)   |
| 525.1       | Loss of teeth or edentulism                                     | 11.22          | 7.33E-01 | 1 (0.99, 1.02)      |
| 214.1       | Lipoma of skin and subcutaneous tissue                          | 1.18           | 7.35E-01 | 0.99 (0.94, 1.04)   |
| 523.32      | Chronic periodontitis                                           | 2.49           | 7.35E-01 | 1.01 (0.97, 1.04)   |
| 250.24      | Type 2 diabetes with neurological manifestations                | 7.62           | 7.36E-01 | 1 (0.98, 1.02)      |
| 563         | Constipation                                                    | 7.65           | 7.37E-01 | 1 (0.98, 1.02)      |
| 519.8       | Other diseases of respiratory system, NEC                       | 0.44           | 7.38E-01 | 0.99 (0.91, 1.07)   |
| 686.4       | Pyogenic granuloma                                              | 0.16           | 7.39E-01 | 1.02 (0.9, 1.17)    |
| 361         | Retinal detachments and defects                                 | 2.24           | 7.40E-01 | 1.01 (0.97, 1.04)   |
| 964.1       | Anticoagulants causing adverse effects                          | 0.2            | 7.40E-01 | 0.98 (0.87, 1.1)    |
| 695.42      | Systemic lupus erythematosus                                    | 0.26           | 7.41E-01 | 1.02 (0.91, 1.13)   |
| 958         | Certain early complications of trauma or procedure              | 0.11           | 7.41E-01 | 1.03 (0.88, 1.2)    |
| 363.3       | Chorioretinal scars                                             | 1.24           | 7.41E-01 | 1.01 (0.96, 1.06)   |
| 198.4       | Secondary malignant neoplasm of liver                           | 0.31           | 7.42E-01 | 0.98 (0.9, 1.08)    |
| 599.2       | Retention of urine                                              | 3.34           | 7.43E-01 | 1 (0.98, 1.03)      |
| 370.2       | Superficial keratitis                                           | 0.31           | 7.43E-01 | 0.98 (0.9, 1.08)    |
| 580.3       | Nephritis and nephropathy without mention of glomerulonephritis | 1.16           | 7.45E-01 | 1.01 (0.96, 1.06)   |
| 761         | Cervicalgia                                                     | 14.05          | 7.46E-01 | 1 (0.99, 1.02)      |
| 841         | Sprains and strains of                                          | 2.4            | 7.47E-01 | 0.99 (0.96, 1.03)   |

| PheWAS code | Phenotype description                                                                        | Prevalence (%) | p-value  | Odds Ratio (95% CI) |
|-------------|----------------------------------------------------------------------------------------------|----------------|----------|---------------------|
|             | back and neck                                                                                |                |          |                     |
| 994         | Sepsis and SIRS                                                                              | 1.2            | 7.47E-01 | 1.01 (0.96, 1.06)   |
| 473.3       | Paralysis/spasm of vocal cords or larynx                                                     | 0.22           | 7.49E-01 | 1.02 (0.91, 1.14)   |
| 187         | Cancer of other male genital organs                                                          | 0.39           | 7.50E-01 | 0.99 (0.91, 1.07)   |
| 428.4       | Heart failure with preserved EF [Diastolic heart failure]                                    | 1.14           | 7.51E-01 | 0.99 (0.94, 1.04)   |
| 470         | Septal Deviations/Turbinate Hypertrophy                                                      | 2.25           | 7.51E-01 | 1.01 (0.97, 1.04)   |
| 502         | Postinflammatory pulmonary fibrosis                                                          | 0.77           | 7.52E-01 | 0.99 (0.93, 1.05)   |
| 250.41      | Impaired fasting glucose                                                                     | 6.42           | 7.52E-01 | 1 (0.98, 1.02)      |
| 580.12      | Non-proliferative glomerulonephritis                                                         | 0.13           | 7.56E-01 | 0.98 (0.84, 1.14)   |
| 561.1       | Diarrhea                                                                                     | 7.11           | 7.56E-01 | 1 (0.98, 1.02)      |
| 402         | Elevated blood pressure reading without diagnosis of hypertension                            | 4.46           | 7.57E-01 | 1 (0.97, 1.02)      |
| 292.11      | Aphasia                                                                                      | 0.38           | 7.58E-01 | 0.99 (0.91, 1.08)   |
| 528.5       | Diseases of lips                                                                             | 0.18           | 7.58E-01 | 1.02 (0.91, 1.15)   |
| 512.8       | Cough                                                                                        | 11.03          | 7.58E-01 | 1 (0.99, 1.02)      |
| 694.1       | Vitiligo                                                                                     | 0.29           | 7.59E-01 | 1.02 (0.92, 1.12)   |
| 751         | Genitourinary congenital anomalies                                                           | 1.62           | 7.59E-01 | 1.01 (0.97, 1.05)   |
| 729.1       | Rheumatism, unspecified and fibrositis                                                       | 0.44           | 7.59E-01 | 0.99 (0.91, 1.07)   |
| 789         | Nausea and vomiting                                                                          | 4.63           | 7.61E-01 | 1 (0.98, 1.03)      |
| 276.4       | Acid-base balance disorder                                                                   | 1.04           | 7.62E-01 | 1.01 (0.96, 1.06)   |
| 281         | Other deficiency anemia                                                                      | 1.51           | 7.62E-01 | 0.99 (0.95, 1.04)   |
| 198.1       | Secondary malignancy of lymph nodes                                                          | 0.85           | 7.64E-01 | 1.01 (0.95, 1.07)   |
| 145.3       | Cancer of major salivary glands                                                              | 0.18           | 7.65E-01 | 0.98 (0.87, 1.11)   |
| 609.2       | Abnormal spermatozoa                                                                         | 0.18           | 7.66E-01 | 1.02 (0.9, 1.15)    |
| 735.23      | Hallux rigidus                                                                               | 1.17           | 7.66E-01 | 0.99 (0.94, 1.04)   |
| 159         | Malignant neoplasm of other and ill-defined sites within the digestive organs and peritoneum | 0.25           | 7.67E-01 | 1.02 (0.92, 1.13)   |
| 809         | Fracture of unspecified bones                                                                | 1.67           | 7.67E-01 | 1.01 (0.97, 1.05)   |
| 364.1       | Corneal opacity                                                                              | 1.15           | 7.68E-01 | 1.01 (0.96, 1.06)   |
| 577.2       | Chronic pancreatitis                                                                         | 0.55           | 7.69E-01 | 0.99 (0.92, 1.06)   |
| 495.1       | Chronic obstructive asthma                                                                   | 0.94           | 7.70E-01 | 0.99 (0.94, 1.05)   |
| 374.1       | Ectropion or entropion                                                                       | 1              | 7.70E-01 | 1.01 (0.96, 1.06)   |

| PheWAS code | Phenotype description                                                                    | Prevalence (%) | p-value  | Odds Ratio (95% CI) |
|-------------|------------------------------------------------------------------------------------------|----------------|----------|---------------------|
| 284         | Aplastic anemia                                                                          | 0.75           | 7.70E-01 | 0.99 (0.93, 1.05)   |
| 803.3       | Fracture of clavicle or scapula                                                          | 0.43           | 7.70E-01 | 1.01 (0.94, 1.09)   |
| 710.1       | Osteomyelitis                                                                            | 1.5            | 7.71E-01 | 1.01 (0.96, 1.05)   |
| 530.5       | Disorders of esophageal motility                                                         | 0.33           | 7.73E-01 | 0.99 (0.9, 1.08)    |
| 726.3       | Bursitis                                                                                 | 2.39           | 7.73E-01 | 1.01 (0.97, 1.04)   |
| 539         | Bariatric surgery                                                                        | 0.38           | 7.73E-01 | 1.01 (0.93, 1.1)    |
| 569         | Other disorders of intestine                                                             | 0.78           | 7.74E-01 | 1.01 (0.95, 1.07)   |
| 525         | Other diseases of the teeth and supporting structures                                    | 19.2           | 7.74E-01 | 1 (0.99, 1.02)      |
| 700         | Corns and callosities                                                                    | 5.35           | 7.75E-01 | 1 (0.97, 1.02)      |
| 110.12      | Athlete's foot                                                                           | 3.52           | 7.76E-01 | 1 (0.97, 1.03)      |
| 302         | Sexual and gender identity disorders                                                     | 1.13           | 7.76E-01 | 0.99 (0.94, 1.04)   |
| 250.23      | Type 2 diabetes with ophthalmic manifestations                                           | 4.93           | 7.76E-01 | 1 (0.98, 1.03)      |
| 931         | Contact dermatitis and other eczema due to plants [except food]                          | 0.28           | 7.77E-01 | 1.01 (0.92, 1.12)   |
| 480.1       | Bacterial pneumonia                                                                      | 0.81           | 7.77E-01 | 0.99 (0.94, 1.05)   |
| 378.2       | Nystagmus and other irregular eye movements                                              | 0.13           | 7.77E-01 | 0.98 (0.85, 1.13)   |
| 520.1       | Hereditary disturbances in tooth structure                                               | 0.3            | 7.78E-01 | 1.01 (0.92, 1.12)   |
| 10          | Tuberculosis                                                                             | 0.49           | 7.79E-01 | 0.99 (0.91, 1.07)   |
| 872         | Traumatic amputation                                                                     | 0.62           | 7.79E-01 | 1.01 (0.94, 1.08)   |
| 805         | Fracture of vertebral column without mention of spinal cord injury                       | 0.77           | 7.80E-01 | 1.01 (0.95, 1.07)   |
| 364.2       | Corneal edema                                                                            | 0.28           | 7.81E-01 | 1.01 (0.92, 1.12)   |
| 535.9       | Gastritis and duodenitis, NOS                                                            | 1.51           | 7.82E-01 | 1.01 (0.96, 1.05)   |
| 327.3       | Sleep apnea                                                                              | 25.18          | 7.83E-01 | 1 (0.99, 1.01)      |
| 875         | Non-healing surgical wound                                                               | 0.76           | 7.83E-01 | 1.01 (0.95, 1.07)   |
| 364.9       | Cornea replaced by transplant                                                            | 0.21           | 7.84E-01 | 0.98 (0.88, 1.1)    |
| 528.12      | Oral aphthae                                                                             | 0.15           | 7.84E-01 | 1.02 (0.89, 1.17)   |
| 429.2       | Abnormal function study of cardiovascular system                                         | 0.76           | 7.86E-01 | 0.99 (0.93, 1.05)   |
| 938.1       | Acute dermatitis due to solar radiation                                                  | 0.13           | 7.86E-01 | 1.02 (0.89, 1.17)   |
| 731         | Osteitis deformans and osteopathies associated with other disorders classified elsewhere | 0.34           | 7.87E-01 | 1.01 (0.92, 1.11)   |
| 609.1       | Infertility, male                                                                        | 0.15           | 7.88E-01 | 1.02 (0.89, 1.17)   |

| PheWAS code | Phenotype description                                                             | Prevalence (%) | p-value  | Odds Ratio (95% CI) |
|-------------|-----------------------------------------------------------------------------------|----------------|----------|---------------------|
| 535.1       | Acute gastritis                                                                   | 0.26           | 7.88E-01 | 0.99 (0.89, 1.09)   |
| 799         | Debility unspecified                                                              | 4              | 7.89E-01 | 1 (0.97, 1.02)      |
| 1001        | Foreign body injury                                                               | 1.3            | 7.89E-01 | 1.01 (0.96, 1.05)   |
| 450         | Noninfectious disorders of lymphatic channels                                     | 0.58           | 7.89E-01 | 1.01 (0.94, 1.08)   |
| 189.4       | Malignant neoplasm of other urinary organs                                        | 0.11           | 7.90E-01 | 1.02 (0.88, 1.19)   |
| 626.1       | Irregular menstrual cycle/bleeding                                                | 1.52           | 7.91E-01 | 1.01 (0.96, 1.06)   |
| 574.12      | Cholelithiasis with other cholecystitis                                           | 0.39           | 7.92E-01 | 1.01 (0.93, 1.1)    |
| 426         | Cardiac conduction disorders                                                      | 9.31           | 7.93E-01 | 1 (0.98, 1.02)      |
| 858         | Complication of internal orthopedic device                                        | 0.94           | 7.93E-01 | 1.01 (0.95, 1.06)   |
| 150         | Cancer of esophagus                                                               | 0.25           | 7.95E-01 | 1.01 (0.92, 1.12)   |
| 375         | Disorders of lacrimal system                                                      | 0.39           | 7.97E-01 | 0.99 (0.91, 1.07)   |
| 592.2       | Urethritis and urethral syndrome                                                  | 0.23           | 7.98E-01 | 1.02 (0.9, 1.15)    |
| 130         | Spirochetal infection                                                             | 0.18           | 8.00E-01 | 1.02 (0.9, 1.14)    |
| 250.22      | Type 2 diabetes with renal manifestations                                         | 2.32           | 8.00E-01 | 1 (0.96, 1.03)      |
| 457         | Encounter for long-term (current) use of anticoagulants, antithrombotics, aspirin | 2.13           | 8.00E-01 | 1 (0.96, 1.03)      |
| 290.2       | Delirium due to conditions classified elsewhere                                   | 0.61           | 8.02E-01 | 1.01 (0.94, 1.08)   |
| 610         | Benign mammary dysplasias                                                         | 0.53           | 8.04E-01 | 0.99 (0.92, 1.07)   |
| 380.4       | Impacted cerumen                                                                  | 8.53           | 8.04E-01 | 1 (0.98, 1.02)      |
| 279.1       | Immunity deficiency                                                               | 0.13           | 8.04E-01 | 1.02 (0.88, 1.17)   |
| 522         | Diseases of pulp and periapical tissues                                           | 3.94           | 8.05E-01 | 1 (0.97, 1.02)      |
| 737         | Curvature of spine                                                                | 0.75           | 8.05E-01 | 1.01 (0.95, 1.07)   |
| 275.53      | Disorders of phosphorus metabolism                                                | 0.45           | 8.05E-01 | 1.01 (0.93, 1.1)    |
| 300.3       | Obsessive-compulsive disorders                                                    | 0.72           | 8.06E-01 | 0.99 (0.93, 1.05)   |
| 765         | Cervical radiculitis                                                              | 3.55           | 8.07E-01 | 1 (0.97, 1.03)      |
| 564         | Functional digestive disorders                                                    | 3.72           | 8.08E-01 | 1 (0.98, 1.03)      |
| 619.4       | Noninflammatory disorders of vagina                                               | 0.22           | 8.08E-01 | 0.99 (0.87, 1.11)   |
| 261.41      | Rickets or osteomalacia                                                           | 0.14           | 8.09E-01 | 1.02 (0.88, 1.17)   |
| 292         | Neurological disorders                                                            | 7.25           | 8.10E-01 | 1 (0.98, 1.02)      |
| 611.1       | Abnormal mammogram                                                                | 0.43           | 8.11E-01 | 0.99 (0.91, 1.08)   |
| 345.3       | Convulsions                                                                       | 2.88           | 8.12E-01 | 1 (0.97, 1.04)      |
| 592.1       | Cystitis                                                                          | 0.57           | 8.14E-01 | 1.01 (0.94, 1.08)   |

| PheWAS code | Phenotype description                                          | Prevalence (%) | p-value  | Odds Ratio (95% CI) |
|-------------|----------------------------------------------------------------|----------------|----------|---------------------|
| 302.1       | Decreased libido                                               | 0.36           | 8.14E-01 | 0.99 (0.91, 1.08)   |
| 282         | Hereditary hemolytic anemias                                   | 0.5            | 8.14E-01 | 1.01 (0.93, 1.1)    |
| 871         | Open wounds of extremities                                     | 2.59           | 8.14E-01 | 1 (0.96, 1.03)      |
| 519.9       | Symptoms involving respiratory system and other chest symptoms | 1.43           | 8.17E-01 | 0.99 (0.95, 1.04)   |
| 695.8       | Other specified erythematous conditions                        | 0.71           | 8.20E-01 | 1.01 (0.95, 1.07)   |
| 300.11      | Generalized anxiety disorder                                   | 4.44           | 8.21E-01 | 1 (0.98, 1.03)      |
| 525.2       | Atrophy of edentulous alveolar ridge                           | 0.64           | 8.22E-01 | 0.99 (0.93, 1.06)   |
| 352.1       | Trigeminal nerve disorders [CN5]                               | 0.42           | 8.23E-01 | 0.99 (0.91, 1.07)   |
| 430.2       | Intracerebral hemorrhage                                       | 0.14           | 8.23E-01 | 1.02 (0.88, 1.17)   |
| 149.5       | Hx of malignant neoplasm of oral cavity and pharynx            | 0.21           | 8.24E-01 | 1.01 (0.91, 1.13)   |
| 425.2       | Secondary/extrinsic cardiomyopathies                           | 0.4            | 8.25E-01 | 0.99 (0.91, 1.08)   |
| 564.1       | Irritable Bowel Syndrome                                       | 2.21           | 8.26E-01 | 1 (0.97, 1.04)      |
| 386         | Vertiginous syndromes and other disorders of vestibular system | 1.93           | 8.27E-01 | 1 (0.96, 1.03)      |
| 255.21      | Glucocorticoid deficiency                                      | 0.16           | 8.28E-01 | 0.99 (0.87, 1.12)   |
| 733.6       | Costochondritis                                                | 0.18           | 8.30E-01 | 0.99 (0.87, 1.12)   |
| 729         | Other disorders of soft tissues                                | 0.73           | 8.31E-01 | 0.99 (0.93, 1.06)   |
| 938         | Dermatitis due to solar radiation                              | 1.18           | 8.32E-01 | 1.01 (0.96, 1.05)   |
| 276.14      | Hypopotassemia                                                 | 3.78           | 8.32E-01 | 1 (0.97, 1.03)      |
| 735.2       | Acquired toe deformities                                       | 6.23           | 8.33E-01 | 1 (0.98, 1.03)      |
| 8           | Intestinal infection                                           | 1.2            | 8.34E-01 | 0.99 (0.95, 1.04)   |
| 593.1       | Gross hematuria                                                | 1.66           | 8.34E-01 | 1 (0.96, 1.05)      |
| 694         | Dyschromia and Vitiligo                                        | 1.98           | 8.34E-01 | 1 (0.96, 1.03)      |
| 512.9       | Other dyspnea                                                  | 8.13           | 8.35E-01 | 1 (0.98, 1.02)      |
| 350.1       | Abnormal involuntary movements                                 | 2.73           | 8.35E-01 | 1 (0.97, 1.04)      |
| 427.3       | Other specified cardiac dysrhythmias                           | 6.43           | 8.37E-01 | 1 (0.98, 1.02)      |
| 613.9       | Breast disorder NOS                                            | 0.1            | 8.37E-01 | 1.02 (0.86, 1.2)    |
| 459         | Other disorders of circulatory system                          | 2.6            | 8.40E-01 | 1 (0.96, 1.03)      |
| 741.2       | Stiffness of joint                                             | 0.55           | 8.40E-01 | 0.99 (0.92, 1.07)   |
| 198.2       | Secondary malignancy of respiratory organs                     | 0.34           | 8.41E-01 | 0.99 (0.91, 1.08)   |
| 165         | Cancer within the respiratory system                           | 1.62           | 8.41E-01 | 1 (0.96, 1.05)      |



| PheWAS code | Phenotype description                                                           | Prevalence (%) | p-value  | Odds Ratio (95% CI) |
|-------------|---------------------------------------------------------------------------------|----------------|----------|---------------------|
| 626         | Disorders of menstruation and other abnormal bleeding from female genital tract | 1.95           | 8.42E-01 | 0.99 (0.95, 1.05)   |
| 381.9       | Otorrhea                                                                        | 0.14           | 8.44E-01 | 0.99 (0.86, 1.13)   |
| 580         | Nephritis; nephrosis; renal sclerosis                                           | 1.56           | 8.44E-01 | 1 (0.96, 1.05)      |
| 733.4       | Aseptic necrosis of bone                                                        | 0.56           | 8.45E-01 | 0.99 (0.92, 1.07)   |
| 803         | Fracture of upper limb                                                          | 2.15           | 8.45E-01 | 1 (0.97, 1.04)      |
| 430         | Intracranial hemorrhage                                                         | 0.55           | 8.46E-01 | 0.99 (0.93, 1.07)   |
| 300.12      | Agoraphobia, social phobia, and panic disorder                                  | 3.05           | 8.47E-01 | 1 (0.97, 1.03)      |
| 626.11      | Absent or infrequent menstruation                                               | 0.22           | 8.47E-01 | 1.01 (0.9, 1.14)    |
| 742.9       | Other derangement of joint                                                      | 0.83           | 8.47E-01 | 0.99 (0.94, 1.05)   |
| 364.5       | Corneal dystrophy                                                               | 0.78           | 8.47E-01 | 0.99 (0.94, 1.05)   |
| 562         | Diverticulosis and diverticulitis                                               | 9.84           | 8.48E-01 | 1 (0.98, 1.02)      |
| 229         | Benign neoplasm of unspecified sites                                            | 0.15           | 8.49E-01 | 1.01 (0.89, 1.15)   |
| 172.1       | Melanomas of skin, dx or hx                                                     | 2.09           | 8.50E-01 | 1 (0.97, 1.04)      |
| 389.5       | Disorders of acoustic nerve                                                     | 0.12           | 8.50E-01 | 0.99 (0.85, 1.14)   |
| 876         | Posttraumatic wound infection not elsewhere classified                          | 0.23           | 8.51E-01 | 1.01 (0.91, 1.13)   |
| 426.21      | First degree AV block                                                           | 0.71           | 8.53E-01 | 1.01 (0.95, 1.07)   |
| 295.1       | Schizophrenia                                                                   | 2.91           | 8.55E-01 | 1 (0.96, 1.03)      |
| 599.3       | Dysuria                                                                         | 1.31           | 8.55E-01 | 1 (0.95, 1.04)      |
| 535         | Gastritis and duodenitis                                                        | 3.92           | 8.56E-01 | 1 (0.97, 1.03)      |
| 426.91      | Cardiac pacemaker in situ                                                       | 2.63           | 8.56E-01 | 1 (0.97, 1.03)      |
| 710         | Osteomyelitis, periostitis, and other infections involving bone                 | 1.56           | 8.57E-01 | 1 (0.96, 1.05)      |
| 604         | Disorders of penis                                                              | 1.56           | 8.58E-01 | 1 (0.96, 1.05)      |
| 429.1       | Heart transplant/surgery                                                        | 0.33           | 8.58E-01 | 0.99 (0.91, 1.09)   |
| 1015        | Effects of other external causes                                                | 4.17           | 8.59E-01 | 1 (0.97, 1.02)      |
| 601.4       | Balanoposthitis                                                                 | 0.44           | 8.61E-01 | 0.99 (0.92, 1.07)   |
| 245.2       | Chronic thyroiditis                                                             | 0.17           | 8.61E-01 | 0.99 (0.87, 1.12)   |
| 561.2       | Flatulence                                                                      | 0.88           | 8.62E-01 | 1.01 (0.95, 1.06)   |
| 327         | Sleep disorders                                                                 | 18.58          | 8.64E-01 | 1 (0.99, 1.02)      |
| 625         | Pain and other symptoms associated with female genital organs                   | 0.59           | 8.64E-01 | 1.01 (0.93, 1.09)   |
| 301.1       | Schizoid personality                                                            | 0.31           | 8.64E-01 | 0.99 (0.9, 1.09)    |

| PheWAS code | Phenotype description                                            | Prevalence (%) | p-value  | Odds Ratio (95% CI) |
|-------------|------------------------------------------------------------------|----------------|----------|---------------------|
|             | disorder                                                         |                |          |                     |
| 706.8       | Other specified diseases of sebaceous glands                     | 2.82           | 8.67E-01 | 1 (0.97, 1.04)      |
| 513.3       | Hypoventilation                                                  | 0.44           | 8.70E-01 | 1.01 (0.93, 1.09)   |
| 198         | Secondary malignant neoplasm                                     | 2.02           | 8.70E-01 | 1 (0.97, 1.04)      |
| 965         | Poisoning by analgesics, antipyretics, and antirheumatics        | 0.2            | 8.72E-01 | 1.01 (0.9, 1.14)    |
| 8.5         | Bacterial enteritis                                              | 0.67           | 8.72E-01 | 0.99 (0.93, 1.06)   |
| 705.3       | Hidradenitis                                                     | 0.31           | 8.75E-01 | 0.99 (0.9, 1.1)     |
| 290.16      | Vascular dementia                                                | 0.4            | 8.75E-01 | 0.99 (0.91, 1.08)   |
| 286.5       | Hemorrhagic disorder due to intrinsic circulating anticoagulants | 0.19           | 8.75E-01 | 0.99 (0.88, 1.12)   |
| 350.6       | Disturbances of sensation of smell and taste                     | 0.21           | 8.76E-01 | 1.01 (0.9, 1.13)    |
| 374.6       | Dermatochalasis                                                  | 1.68           | 8.76E-01 | 1 (0.96, 1.04)      |
| 401.22      | Hypertensive chronic kidney disease                              | 5.64           | 8.77E-01 | 1 (0.98, 1.03)      |
| 627.1       | Postmenopausal bleeding                                          | 0.26           | 8.77E-01 | 0.99 (0.89, 1.1)    |
| 287.3       | Thrombocytopenia                                                 | 2.78           | 8.78E-01 | 1 (0.97, 1.03)      |
| 368.9       | Subjective visual disturbances                                   | 1.49           | 8.80E-01 | 1 (0.96, 1.05)      |
| 394.1       | Mitral valve stenosis and aortic valve stenosis                  | 0.31           | 8.82E-01 | 0.99 (0.9, 1.09)    |
| 597.2       | Urinary complications NEC                                        | 0.11           | 8.83E-01 | 0.99 (0.85, 1.15)   |
| 292.5       | Transient alteration of awareness                                | 0.13           | 8.83E-01 | 0.99 (0.86, 1.14)   |
| 613.7       | Other signs and symptoms in breast                               | 0.13           | 8.85E-01 | 1.01 (0.87, 1.17)   |
| 577.3       | Cyst and pseudocyst of pancreas                                  | 0.34           | 8.87E-01 | 1.01 (0.92, 1.1)    |
| 224         | Benign neoplasm of eye                                           | 2.24           | 8.87E-01 | 1 (0.96, 1.03)      |
| 497         | Bronchitis                                                       | 4.64           | 8.87E-01 | 1 (0.97, 1.02)      |
| 79          | Viral infection                                                  | 0.77           | 8.88E-01 | 1 (0.94, 1.07)      |
| 756         | Other congenital musculoskeletal anomalies                       | 0.16           | 8.89E-01 | 1.01 (0.89, 1.15)   |
| 519         | Other diseases of respiratory system, not elsewhere classified   | 2.3            | 8.89E-01 | 1 (0.96, 1.03)      |
| 681.6       | Cellulitis and abscess of foot, toe                              | 0.78           | 8.90E-01 | 1 (0.95, 1.07)      |
| 386.3       | Labyrinthitis                                                    | 0.15           | 8.90E-01 | 1.01 (0.88, 1.15)   |
| 327.32      | Obstructive sleep apnea                                          | 14.23          | 8.91E-01 | 1 (0.98, 1.01)      |
| 110.13      | Dermatophytosis of the body                                      | 0.84           | 8.93E-01 | 1 (0.94, 1.05)      |

| PheWAS code | Phenotype description                                                                                                   | Prevalence (%) | p-value  | Odds Ratio (95% CI) |
|-------------|-------------------------------------------------------------------------------------------------------------------------|----------------|----------|---------------------|
| 290.3       | Other persistent mental disorders due to conditions classified elsewhere                                                | 4.93           | 8.93E-01 | 1 (0.98, 1.03)      |
| 180         | Cervical cancer and dysplasia                                                                                           | 0.35           | 8.94E-01 | 1.01 (0.92, 1.1)    |
| 527.7       | Disturbance of salivary secretion                                                                                       | 0.29           | 8.96E-01 | 1.01 (0.91, 1.11)   |
| 512.2       | Painful respiration                                                                                                     | 1.62           | 8.96E-01 | 1 (0.96, 1.04)      |
| 695.4       | Lupus (localized and systemic)                                                                                          | 0.36           | 8.96E-01 | 0.99 (0.91, 1.09)   |
| 245.21      | Chronic lymphocytic thyroiditis                                                                                         | 0.16           | 8.97E-01 | 0.99 (0.87, 1.13)   |
| 198.5       | Secondary malignancy of brain/spine                                                                                     | 0.19           | 8.99E-01 | 0.99 (0.88, 1.12)   |
| 149.4       | Cancer of larynx                                                                                                        | 0.41           | 8.99E-01 | 1.01 (0.93, 1.09)   |
| 586.4       | Stricture/obstruction of ureter                                                                                         | 0.27           | 9.00E-01 | 0.99 (0.9, 1.1)     |
| 327.1       | Hypersomnia                                                                                                             | 0.38           | 9.01E-01 | 0.99 (0.91, 1.08)   |
| 454         | Varicose veins                                                                                                          | 3.43           | 9.02E-01 | 1 (0.97, 1.03)      |
| 733.8       | Malunion and nonunion of fracture                                                                                       | 0.31           | 9.03E-01 | 1.01 (0.92, 1.1)    |
| 713.5       | Arthropathy associated with neurological disorders                                                                      | 0.26           | 9.06E-01 | 0.99 (0.9, 1.1)     |
| 371.1       | Uveitis, noninfectious or NOS                                                                                           | 1.1            | 9.06E-01 | 1 (0.95, 1.06)      |
| 278         | Overweight, obesity and other hyperalimentation                                                                         | 38.52          | 9.06E-01 | 1 (0.99, 1.01)      |
| 772.4       | Rhabdomyolysis                                                                                                          | 0.29           | 9.06E-01 | 0.99 (0.9, 1.1)     |
| 1010        | Other tests                                                                                                             | 76.07          | 9.07E-01 | 1 (0.99, 1.01)      |
| 324         | Other CNS infection and poliomyelitis                                                                                   | 0.16           | 9.08E-01 | 0.99 (0.87, 1.13)   |
| 694.2       | Other dyschromia                                                                                                        | 1.66           | 9.08E-01 | 1 (0.96, 1.04)      |
| 619         | Noninflammatory female genital disorders                                                                                | 0.98           | 9.10E-01 | 1 (0.94, 1.07)      |
| 793.2       | Nonspecific abnormal findings on radiological and other examination of other intrathoracic organs (echocardiogram, etc) | 0.17           | 9.10E-01 | 0.99 (0.88, 1.12)   |
| 70.4        | Chronic hepatitis                                                                                                       | 0.3            | 9.11E-01 | 1.01 (0.91, 1.11)   |
| 110.2       | Dermatomycoses                                                                                                          | 0.73           | 9.11E-01 | 1 (0.93, 1.06)      |
| 457.3       | Encounter for long-term (current) use of aspirin                                                                        | 1.55           | 9.13E-01 | 1 (0.96, 1.05)      |
| 418.1       | Precordial pain                                                                                                         | 0.21           | 9.13E-01 | 0.99 (0.89, 1.11)   |
| 602         | Other disorders of prostate                                                                                             | 0.57           | 9.15E-01 | 1 (0.94, 1.08)      |
| 380         | Disorders of external ear                                                                                               | 0.69           | 9.15E-01 | 1 (0.94, 1.07)      |
| 614.52      | Vaginitis and vulvovaginitis                                                                                            | 1              | 9.17E-01 | 1 (0.94, 1.07)      |

| PheWAS code | Phenotype description                                                    | Prevalence (%) | p-value  | Odds Ratio (95% CI) |
|-------------|--------------------------------------------------------------------------|----------------|----------|---------------------|
| 495.2       | Asthma with exacerbation                                                 | 0.64           | 9.17E-01 | 1 (0.94, 1.07)      |
| 483         | Acute bronchitis and bronchiolitis                                       | 5.14           | 9.18E-01 | 1 (0.98, 1.03)      |
| 965.1       | Opiates and related narcotics causing adverse effects in therapeutic use | 0.18           | 9.18E-01 | 1.01 (0.89, 1.14)   |
| 153.3       | Malignant neoplasm of rectum, rectosigmoid junction, and anus            | 0.58           | 9.19E-01 | 1 (0.94, 1.07)      |
| 611         | Abnormal findings on mammogram or breast exam                            | 1.54           | 9.21E-01 | 1 (0.96, 1.05)      |
| 952         | Spinal cord injury without evidence of spinal bone injury                | 0.2            | 9.21E-01 | 1.01 (0.89, 1.13)   |
| 772.3       | Muscle weakness                                                          | 3.94           | 9.21E-01 | 1 (0.97, 1.03)      |
| 561         | Symptoms involving digestive system                                      | 9.26           | 9.22E-01 | 1 (0.98, 1.02)      |
| 355.1       | Chronic pain syndrome                                                    | 2.08           | 9.22E-01 | 1 (0.97, 1.04)      |
| 555.21      | Ulcerative colitis (chronic)                                             | 0.2            | 9.23E-01 | 1.01 (0.9, 1.13)    |
| 803.2       | Fracture of radius and ulna                                              | 1.13           | 9.24E-01 | 1 (0.95, 1.05)      |
| 790.6       | Other abnormal blood chemistry                                           | 4.45           | 9.24E-01 | 1 (0.98, 1.03)      |
| 216         | Benign neoplasm of skin                                                  | 5.52           | 9.24E-01 | 1 (0.98, 1.02)      |
| 701.2       | Scar conditions and fibrosis of skin                                     | 1.09           | 9.25E-01 | 1 (0.95, 1.05)      |
| 840.3       | Joint/ligament sprain                                                    | 0.75           | 9.26E-01 | 1 (0.94, 1.06)      |
| 425.1       | Primary/intrinsic cardiomyopathies                                       | 3.03           | 9.31E-01 | 1 (0.97, 1.03)      |
| 556         | Ulceration of the lower GI tract                                         | 0.23           | 9.32E-01 | 1 (0.9, 1.12)       |
| 367.1       | Myopia                                                                   | 10.44          | 9.32E-01 | 1 (0.98, 1.02)      |
| 521.2       | Dental abrasion, erosion and attrition                                   | 1.52           | 9.32E-01 | 1 (0.96, 1.04)      |
| 364.51      | Fuchs' dystrophy                                                         | 0.46           | 9.32E-01 | 1 (0.92, 1.07)      |
| 165.1       | Cancer of bronchus; lung                                                 | 1.59           | 9.33E-01 | 1 (0.96, 1.04)      |
| 747.2       | Congenital anomalies of peripheral vascular system                       | 0.11           | 9.35E-01 | 1.01 (0.86, 1.18)   |
| 580.31      | Nephritis and nephropathy in diseases classified elsewhere               | 0.8            | 9.35E-01 | 1 (0.94, 1.06)      |
| 250.42      | Other abnormal glucose                                                   | 5.38           | 9.36E-01 | 1 (0.98, 1.02)      |
| 559         | Ileostomy status                                                         | 0.34           | 9.36E-01 | 1 (0.92, 1.1)       |
| 117         | Mycoses                                                                  | 0.55           | 9.36E-01 | 1 (0.93, 1.07)      |
| 41.4        | E. coli                                                                  | 0.29           | 9.40E-01 | 1 (0.9, 1.1)        |
| 224.1       | Benign neoplasm of eye,                                                  | 2.1            | 9.41E-01 | 1 (0.97, 1.04)      |

| PheWAS code | Phenotype description                                                           | Prevalence | p-value  | Odds Ratio (95% CI) |
|-------------|---------------------------------------------------------------------------------|------------|----------|---------------------|
|             | uveal                                                                           |            |          |                     |
| 276.41      | Acidosis                                                                        | 0.84       | 9.41E-01 | 1 (0.94, 1.06)      |
| 713         | Arthropathy associated with other disorders classified elsewhere                | 0.28       | 9.42E-01 | 1 (0.91, 1.11)      |
| 158         | Neoplasm of unspecified nature of digestive system                              | 0.41       | 9.42E-01 | 1 (0.92, 1.09)      |
| 626.13      | Irregular menstrual cycle                                                       | 0.34       | 9.42E-01 | 1 (0.91, 1.11)      |
| 442.3       | Aneurysm of artery of lower extremity                                           | 0.15       | 9.44E-01 | 1 (0.88, 1.14)      |
| 575.2       | Obstruction of bile duct                                                        | 0.14       | 9.44E-01 | 1.01 (0.87, 1.16)   |
| 441         | Vascular insufficiency of intestine                                             | 0.21       | 9.45E-01 | 1 (0.89, 1.11)      |
| 41          | Bacterial infection NOS                                                         | 4.22       | 9.46E-01 | 1 (0.97, 1.03)      |
| 550.5       | Ventral hernia                                                                  | 1.39       | 9.46E-01 | 1 (0.96, 1.04)      |
| 696.42      | Psoriatic arthropathy                                                           | 0.47       | 9.47E-01 | 1 (0.93, 1.07)      |
| 743.2       | Pathologic fracture                                                             | 0.29       | 9.47E-01 | 1 (0.91, 1.1)       |
| 427.1       | Paroxysmal tachycardia, unspecified                                             | 1.8        | 9.47E-01 | 1 (0.96, 1.04)      |
| 857         | Mechanical complication of unspecified genitourinary device, implant, and graft | 0.22       | 9.48E-01 | 1 (0.9, 1.12)       |
| 278.1       | Obesity                                                                         | 34.96      | 9.49E-01 | 1 (0.99, 1.01)      |
| 454.11      | Varicose veins of lower extremity, symptomatic                                  | 1.64       | 9.50E-01 | 1 (0.96, 1.04)      |
| 578.9       | Hemorrhage of gastrointestinal tract                                            | 2.11       | 9.51E-01 | 1 (0.96, 1.04)      |
| 287         | Purpura and other hemorrhagic conditions                                        | 2.96       | 9.52E-01 | 1 (0.97, 1.03)      |
| 578.1       | Hematemesis                                                                     | 0.28       | 9.52E-01 | 1 (0.91, 1.11)      |
| 394.2       | Mitral valve disease                                                            | 0.16       | 9.53E-01 | 1 (0.88, 1.14)      |
| 614.5       | Inflammatory disease of cervix, vagina, and vulva                               | 1.2        | 9.54E-01 | 1 (0.94, 1.06)      |
| 250.4       | Abnormal glucose                                                                | 11.55      | 9.55E-01 | 1 (0.98, 1.02)      |
| 277.51      | Lipoprotein disorders                                                           | 0.24       | 9.55E-01 | 1 (0.9, 1.12)       |
| 558         | Noninfectious gastroenteritis                                                   | 2.62       | 9.56E-01 | 1 (0.97, 1.03)      |
| 217.1       | Nevus, non-neoplastic                                                           | 1.19       | 9.56E-01 | 1 (0.96, 1.05)      |
| 743.9       | Osteopenia or other disorder of bone and cartilage                              | 3.74       | 9.57E-01 | 1 (0.97, 1.03)      |
| 741.1       | Ankylosis of joint                                                              | 0.12       | 9.59E-01 | 1 (0.85, 1.16)      |
| 710.12      | Chronic osteomyelitis                                                           | 0.55       | 9.60E-01 | 1 (0.93, 1.07)      |
| 250.6       | Polyneuropathy in diabetes                                                      | 4.63       | 9.60E-01 | 1 (0.98, 1.03)      |
| 562.1       | Diverticulosis                                                                  | 8.77       | 9.60E-01 | 1 (0.98, 1.02)      |
| 350.2       | Abnormality of gait                                                             | 7.36       | 9.61E-01 | 1 (0.98, 1.02)      |
| 608         | Other disorders of male                                                         | 1.76       | 9.62E-01 | 1 (0.96, 1.04)      |

| PheWAS code | Phenotype description                                        | Prevalence (%) | p-value  | Odds Ratio (95% CI) |
|-------------|--------------------------------------------------------------|----------------|----------|---------------------|
|             | genital organs                                               |                |          |                     |
| 272.13      | Mixed hyperlipidemia                                         | 8.69           | 9.62E-01 | 1 (0.98, 1.02)      |
| 242.3       | Exophthalmos                                                 | 0.18           | 9.63E-01 | 1 (0.88, 1.14)      |
| 871.2       | Open wound of finger(s)                                      | 0.55           | 9.64E-01 | 1 (0.93, 1.07)      |
| 359         | Muscular dystrophies and other myopathies                    | 0.27           | 9.67E-01 | 1 (0.9, 1.11)       |
| 603.2       | Spermatocele                                                 | 0.33           | 9.67E-01 | 1 (0.92, 1.1)       |
| 131         | Protozoan infection                                          | 0.15           | 9.68E-01 | 1 (0.84, 1.18)      |
| 818.1       | Subdural hemorrhage (injury)                                 | 0.1            | 9.69E-01 | 1 (0.85, 1.17)      |
| 681.2       | Cellulitis and abscess of face/neck                          | 0.49           | 9.70E-01 | 1 (0.93, 1.08)      |
| 454.1       | Varicose veins of lower extremity                            | 2.99           | 9.70E-01 | 1 (0.97, 1.03)      |
| 415.21      | Primary pulmonary hypertension                               | 0.29           | 9.71E-01 | 1 (0.91, 1.11)      |
| 278.3       | Localized adiposity                                          | 0.11           | 9.72E-01 | 1 (0.85, 1.18)      |
| 980         | Encounter for long-term (current) use of antibiotics         | 0.64           | 9.72E-01 | 1 (0.94, 1.07)      |
| 290         | Delirium dementia and amnestic and other cognitive disorders | 2.36           | 9.73E-01 | 1 (0.97, 1.04)      |
| 389         | Hearing loss                                                 | 40.83          | 9.73E-01 | 1 (0.99, 1.01)      |
| 478         | Throat pain                                                  | 0.27           | 9.74E-01 | 1 (0.91, 1.11)      |
| 217         | Vascular hamartomas and non-neoplastic nevi                  | 1.2            | 9.75E-01 | 1 (0.95, 1.05)      |
| 300.8       | Acute reaction to stress                                     | 0.78           | 9.75E-01 | 1 (0.94, 1.06)      |
| 395.1       | Nonrheumatic mitral valve disorders                          | 1.84           | 9.76E-01 | 1 (0.96, 1.04)      |
| 458         | Hypotension                                                  | 5.25           | 9.76E-01 | 1 (0.98, 1.03)      |
| 628         | Ovarian cyst                                                 | 0.47           | 9.76E-01 | 1 (0.92, 1.09)      |
| 193         | Thyroid cancer                                               | 0.43           | 9.77E-01 | 1 (0.93, 1.08)      |
| 198.6       | Secondary malignancy of bone                                 | 0.53           | 9.78E-01 | 1 (0.93, 1.08)      |
| 481         | Influenza                                                    | 0.47           | 9.78E-01 | 1 (0.93, 1.08)      |
| 249         | Secondary diabetes mellitus                                  | 0.1            | 9.78E-01 | 1 (0.84, 1.18)      |
| 297.2       | Suicide or self-inflicted injury                             | 0.8            | 9.83E-01 | 1 (0.94, 1.06)      |
| 281.12      | Other vitamin B12 deficiency anemia                          | 0.62           | 9.83E-01 | 1 (0.94, 1.07)      |
| 960         | Poisoning by antibiotics                                     | 0.25           | 9.83E-01 | 1 (0.9, 1.11)       |
| 782.3       | Edema                                                        | 10.16          | 9.85E-01 | 1 (0.98, 1.02)      |
| 90          | Sexually transmitted infections (not HIV or hepatitis)       | 0.88           | 9.87E-01 | 1 (0.94, 1.06)      |
| 579.2       | Splenomegaly                                                 | 0.36           | 9.88E-01 | 1 (0.92, 1.09)      |
| 704.11      | Alopecia Areata                                              | 0.14           | 9.88E-01 | 1 (0.87, 1.16)      |
| 722.7       | Intervertebral disc                                          | 0.61           | 9.89E-01 | 1 (0.93, 1.07)      |

| <b>PheWAS code</b> | <b>Phenotype description</b>                                | <b>Prevalence (%)</b> | <b>p-value</b> | <b>Odds Ratio (95% CI)</b> |
|--------------------|-------------------------------------------------------------|-----------------------|----------------|----------------------------|
|                    | disorder with myelopathy                                    |                       |                |                            |
| 726.4              | Calcaneal spur;<br>Exostosis NOS                            | 2.22                  | 9.90E-01       | 1 (0.96, 1.04)             |
| 427.42             | Cardiac arrest                                              | 0.16                  | 9.91E-01       | 1 (0.88, 1.14)             |
| 562.2              | Diverticulitis                                              | 1.63                  | 9.91E-01       | 1 (0.96, 1.04)             |
| 783                | Fever of unknown origin                                     | 2.27                  | 9.92E-01       | 1 (0.96, 1.04)             |
| 368.3              | Anisometropia                                               | 0.59                  | 9.92E-01       | 1 (0.94, 1.07)             |
| 612                | Breast conditions,<br>congenital or relating to<br>hormones | 1.06                  | 9.92E-01       | 1 (0.95, 1.05)             |
| 359.2              | Myopathy                                                    | 0.23                  | 9.93E-01       | 1 (0.89, 1.12)             |
| 332                | Parkinson's disease                                         | 1.1                   | 9.95E-01       | 1 (0.95, 1.05)             |
| 446                | Polyarteritis nodosa and<br>allied conditions               | 0.38                  | 9.96E-01       | 1 (0.92, 1.09)             |
| 695.41             | Cutaneous lupus<br>erythematosus                            | 0.2                   | 9.97E-01       | 1 (0.88, 1.13)             |
| 70.3               | Viral hepatitis C                                           | 5.74                  | 9.99E-01       | 1 (0.98, 1.02)             |
| 473.1              | Chronic laryngitis                                          | 0.16                  | 1.00E+00       | 1 (0.88, 1.14)             |

**eTable 2.** Positive predictive value of PheWAS codes based on medical record review\*

| <b>PheWAS Code Description</b>                                                       | <b>PheWAS Code</b> | <b>PPV for patients<br/>≥1 PheWAS code</b> | <b>PPV for patients<br/>≥2 PheWAS codes</b> |
|--------------------------------------------------------------------------------------|--------------------|--------------------------------------------|---------------------------------------------|
| Abdominal aortic aneurysm                                                            | 442.11             | 0.65                                       | 0.8                                         |
| Coronary atherosclerosis                                                             | 411.4              | 1                                          | 1                                           |
| Ischemic heart disease                                                               | 411                | 0.95                                       | 1                                           |
| Other chronic ischemic heart disease                                                 | 411.8              | 0.95                                       | 0.94                                        |
| Aortic aneurysm                                                                      | 442.1              | 0.7                                        | 0.9                                         |
| Other aneurysm                                                                       | 442                | 0.95                                       | 1                                           |
| Myocardial infarction                                                                | 411.2              | 0.95                                       | 1                                           |
| Atherosclerosis of native arteries of the extremities with intermittent claudication | 440.22             | 0.55                                       | 0.5                                         |
| Peripheral vascular disease, unspecified                                             | 443.9              | 0.95                                       | 1                                           |
| Atherosclerosis of the extremities                                                   | 440.2              | 0.8                                        | 1                                           |
| Atherosclerosis                                                                      | 440                | 1                                          | 1                                           |
| Peripheral vascular disease                                                          | 443                | 0.9                                        | 0.92                                        |
| Degenerative skin conditions and other dermatoses                                    | 702                | 0.9                                        | 0.93                                        |
| Acquired deformities of finger                                                       | 736.2              | 1                                          | 1                                           |
| Aneurysm of iliac artery                                                             | 442.2              | 0.95                                       | 1                                           |
| Seborrheic dermatitis                                                                | 690.1              | 0.85                                       | 1                                           |
| Pleurisy; pleural effusion                                                           | 507                | 0.95                                       | 0.86                                        |
| Atopic dermatitis                                                                    | 939                | 1                                          | 1                                           |
| Disorders resulting from impaired renal function                                     | 588                | 0.9                                        | 0.9                                         |
| Erythematous squamous dermatosis                                                     | 690                | 1                                          | 1                                           |



|                               |        |     |      |
|-------------------------------|--------|-----|------|
| Gouty arthropathy             | 274.11 | 1   | 1    |
| Conjunctivitis, noninfectious | 371.2  | 0.9 | 0.67 |

---

\*In order of significance with *IL6R*

**eTable 3.** Replication of significant associations in the Million Veteran Program (false discovery rate < 0.05) in the UK Biobank\* and BioVU

| Phenotype                                         | UK Biobank*                                              |      |        |                |         | BioVU |      |                |         |
|---------------------------------------------------|----------------------------------------------------------|------|--------|----------------|---------|-------|------|----------------|---------|
|                                                   | Phenotype/<br>ICD10 group                                | (%)  | OR     | 95% CI         | p-value | (%)   | OR   | 95% CI         | p-value |
| Abdominal aortic aneurysm                         | I71 Aortic aneurysm and dissection                       | 0.33 | 0.9997 | 0.9995, 1      | 0.0545  | 4.57  | 0.83 | 0.7082, 0.9726 | 0.0213  |
| Coronary atherosclerosis                          | I25 Chronic ischemic heart disease                       | 6.2  | 0.9983 | 0.9973, 0.9993 | 0.0016  | NA    | NA   | NA             | >0.05   |
| Ischemic Heart Disease                            | I20-I25 Ischemic heart diseases                          | 7.47 | 0.9979 | 0.9968, 0.9991 | 0.0003  | NA    | NA   | NA             | >0.05   |
| Other chronic ischemic heart disease, unspecified | I25 Chronic ischemic heart disease                       | 6.2  | 0.9983 | 0.9973, 0.9993 | 0.0016  | NA    | NA   | NA             | >0.05   |
| Aortic aneurysm                                   | I71 Aortic aneurysm and dissection                       | 0.33 | 0.9997 | 0.9995, 1      | 0.0545  | NA    | NA   | NA             | >0.05   |
| Other aneurysm                                    | I70-I79 Diseases of arteries, arterioles and capillaries | 1.84 | 0.9997 | 0.9991, 1.0003 | 0.4102  | NA    | NA   | NA             | >0.05   |
| Myocardial infarction                             | I20-I25 Ischemic heart diseases                          | 7.47 | 0.9979 | 0.9968, 0.9991 | 0.0003  | NA    | NA   | NA             | >0.05   |
| Atherosclerosis of native arteries**              | NA                                                       | NA   | NA     | NA             | NA      | NA    | NA   | NA             | >0.05   |
| Peripheral vascular disease, unspecified          | NA                                                       | NA   | NA     | NA             | NA      | NA    | NA   | NA             | >0.05   |
| Atherosclerosis of the extremities                | NA                                                       | NA   | NA     | NA             | NA      | NA    | NA   | NA             | >0.05   |
| Atherosclerosis                                   | I70 Atherosclerosis                                      | 0.31 | 0.9999 | 0.9996, 1.0001 | 0.2442  | NA    | NA   | NA             | >0.05   |
| Peripheral vascular disease                       | I73 Other peripheral vascular diseases                   | 0.9  | 0.9998 | 0.9994, 1.0002 | 0.4020  | NA    | NA   | NA             | >0.05   |

| Phenotype                                             | UK Biobank*                                  |      |        |                |                        | BioVU |       |               |             |
|-------------------------------------------------------|----------------------------------------------|------|--------|----------------|------------------------|-------|-------|---------------|-------------|
|                                                       | Phenotype/<br>ICD10 group                    | (%)  | OR     | 95% CI         | p-<br>value            | (%)   | OR    | 95% CI        | p-<br>value |
| Acquired deformities of finger                        | M20 Acquired deformities of fingers and toes | 2.37 | 1.0003 | 0.9996, 1.0009 | 0.3660                 | NA    | NA    | NA            | >0.05       |
| Aneurysm of iliac artery                              | I72 Other aneurysm                           | 0.12 | 0.9999 | 0.9998, 1.0001 | 0.5264                 | NA    | NA    | NA            | >0.05       |
| Seborrheic dermatitis                                 | NA                                           | NA   | NA     | NA             | NA                     | NA    | NA    | NA            | >0.05       |
| Pleurisy; pleural effusion                            | J90-J94 Other diseases of pleura             | 1.61 | 1.0005 | 1, 1.001       | 0.0494                 | NA    | NA    | NA            | >0.05       |
| Atopic/contact dermatitis due to other or unspecified | L20-L30 Dermatitis and eczema                | 0.76 | 1.0008 | 1.0004, 1.0012 | 2.85 x10 <sup>-5</sup> | 26.32 | 1.076 | 1.002, 1.1554 | 0.0426      |
| Disorders resulting from impaired renal function      | N25-N29 Other disorders of kidney and ureter | 0.64 | 1.0002 | 0.9999, 1.0006 | 0.1656                 | NA    | NA    | NA            | >0.05       |
| Erythematous squamous dermatosis                      | L20-L30 Dermatitis and eczema                | 0.76 | 1.0008 | 1.0004, 1.0012 | 2.85 x10 <sup>-5</sup> | NA    | NA    | NA            | >0.05       |
| Gouty arthropathy                                     | M10 Gout                                     | 0.78 | 1.0004 | 1.0001, 1.0008 | 0.0143                 | NA    | NA    | NA            | >0.05       |
| Conjunctivitis, noninfectious                         | H10-H13 Disorders of conjunctiva             | 0.25 | 1.0002 | 1, 1.0004      | 0.039                  | NA    | NA    | NA            | >0.05       |

\*UK Biobank does not provide individual inpatient ICD10 codes in their dataset; data are grouped into larger groups as listed in this table. Thus, some groups were too large to map back to specific PheWAS codes. If no PheWAS code was available, association was listed as NA. In BioVU all associations with p>0.05 were listed as NA.

\*\*Full description: Atherosclerosis of native arteries of the extremities with intermittent claudication

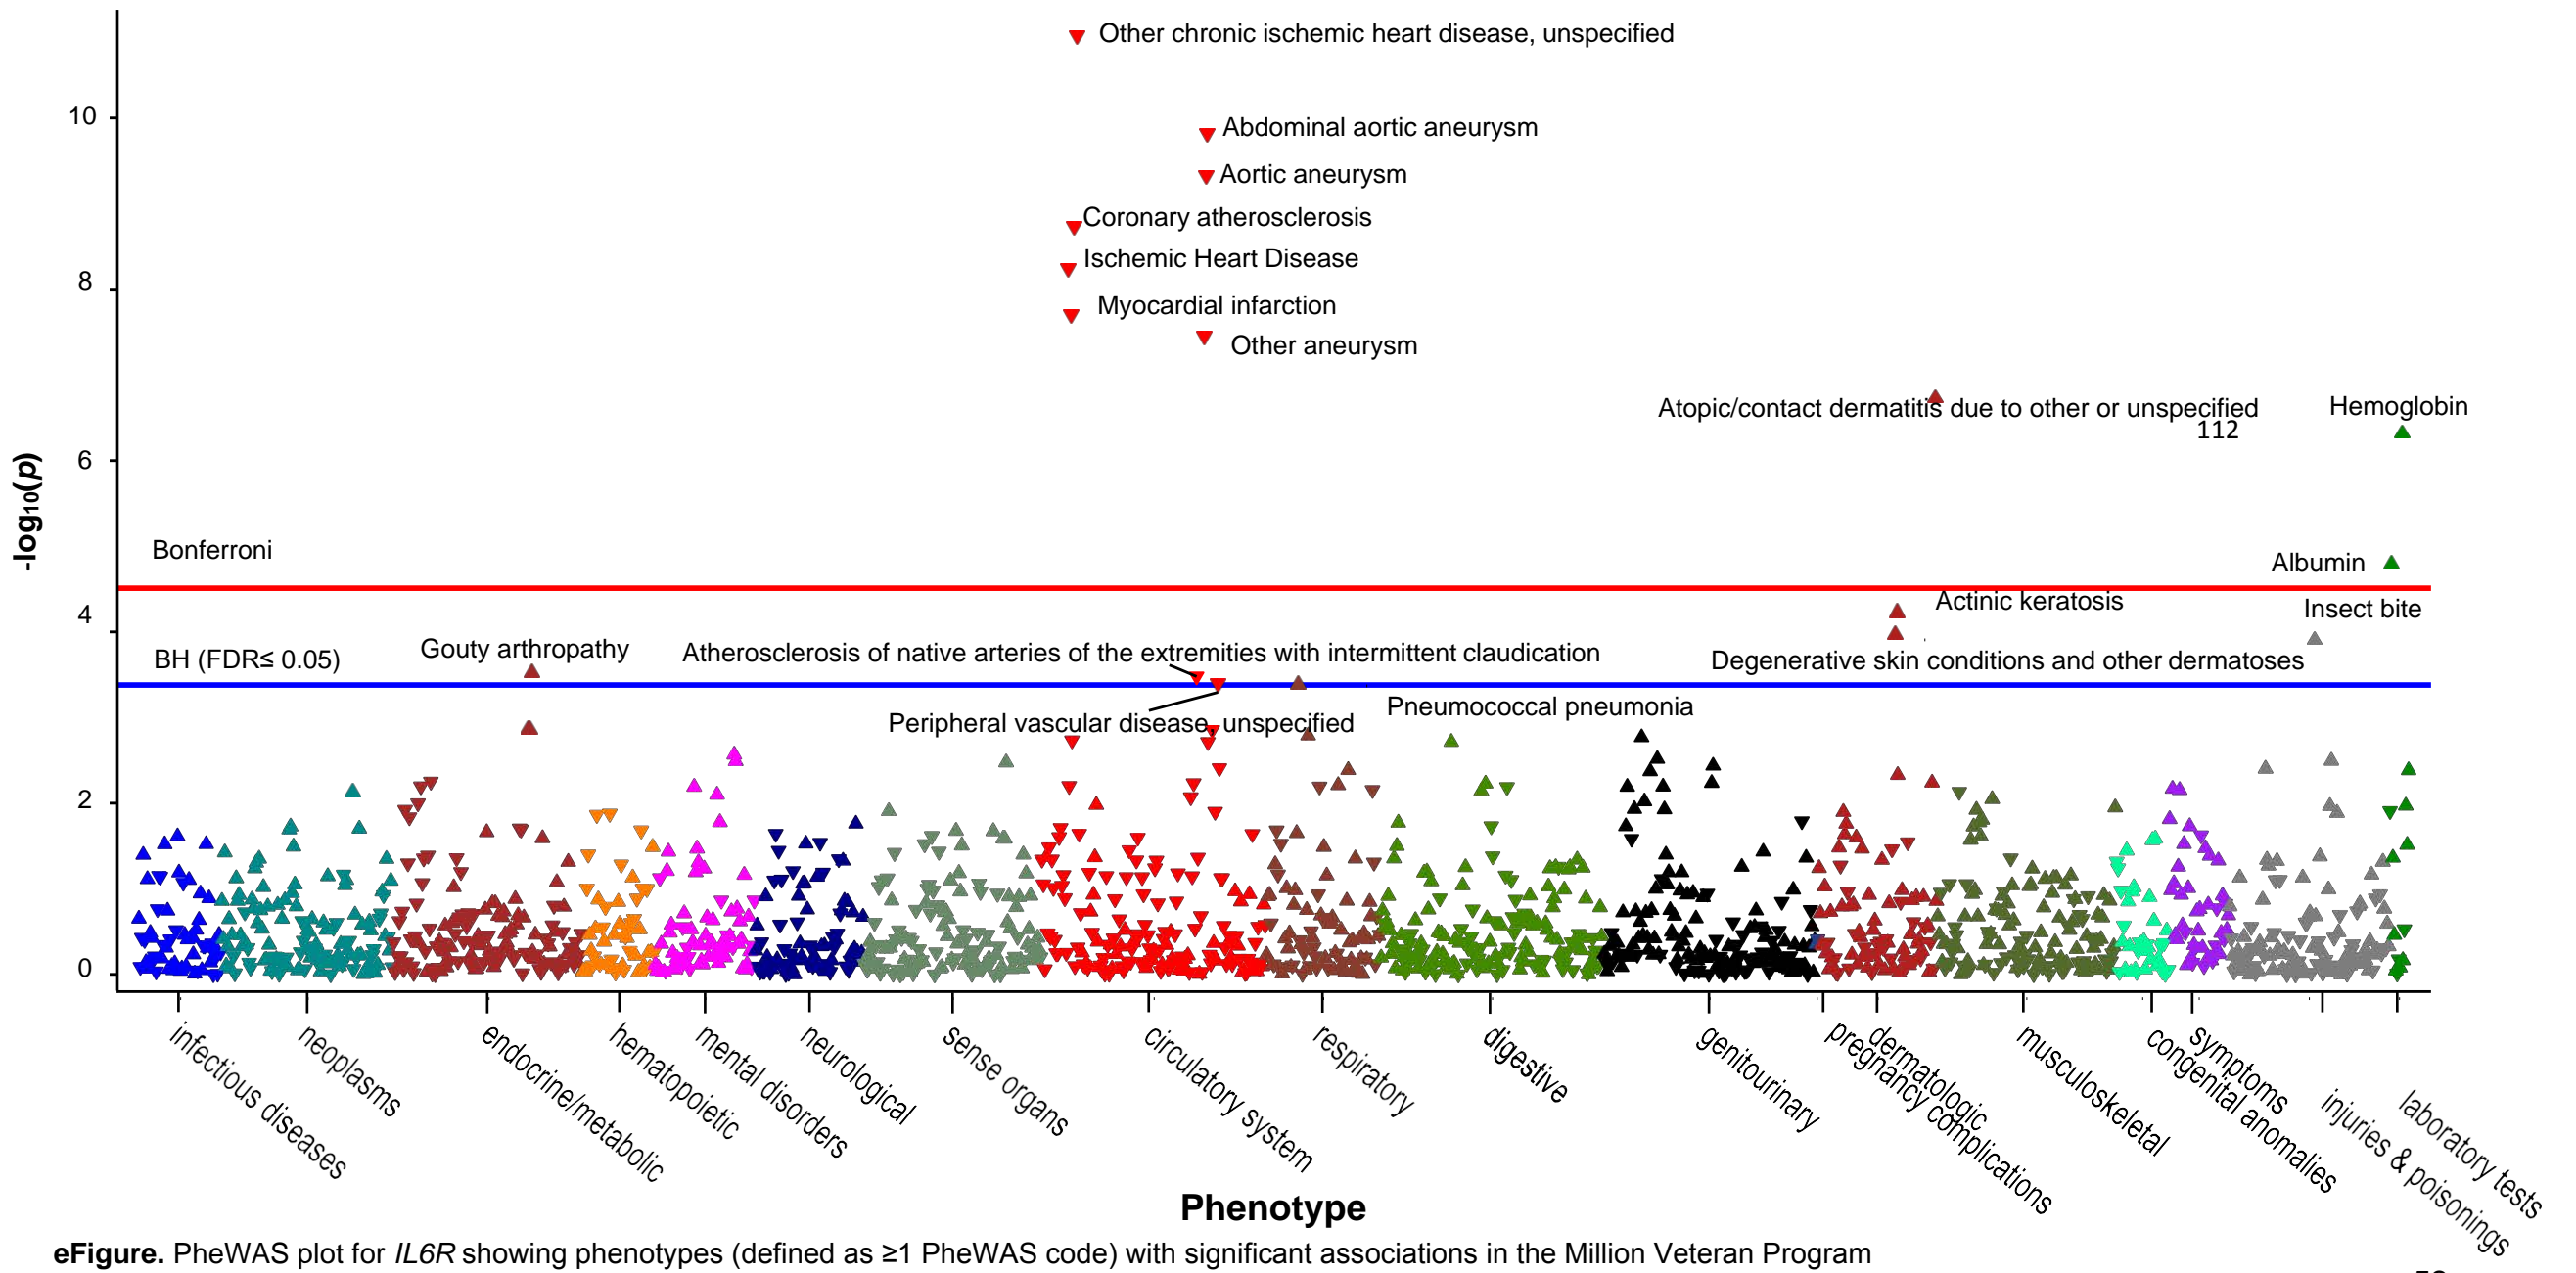

**eFigure.** PheWAS plot for *IL6R* showing phenotypes (defined as ≥1 PheWAS code) with significant associations in the Million Veteran Program

The blue line denotes the B-H FDR ≤ 0.05, and the red line provides Bonferroni correction as a reference. Arrowheads pointing up represent an increased risk while arrowheads pointing down represent a reduced risk for a phenotype or laboratory measurement.
